# Supplementary material
Source: publisher figshare collection journal article supplement (https://acs.figshare.com/ndownloader/files/5197372)
Supplement: Supplementary file 1 [file 5197372]

data_01il02
_database_code_CSD                  190225

_audit_creation_method            SHELXL-97
_chemical_name_systematic
;
?
;
_chemical_name_common             ?
_chemical_melting_point           ?
_chemical_formula_moiety          ?
_chemical_formula_sum
'C83 H77 Cu3 I3 N P6 S'
_chemical_formula_weight          1877.66

loop_
_atom_type_symbol
_atom_type_description
_atom_type_scat_dispersion_real
_atom_type_scat_dispersion_imag
_atom_type_scat_source
'Cu'  'Cu'   0.3201   1.2651
'International Tables Vol C Tables 4.2.6.8 and 6.1.1.4'
'I'  'I'  -0.4742   1.8119
'International Tables Vol C Tables 4.2.6.8 and 6.1.1.4'
'S'  'S'   0.1246   0.1234
'International Tables Vol C Tables 4.2.6.8 and 6.1.1.4'
'P'  'P'   0.1023   0.0942
'International Tables Vol C Tables 4.2.6.8 and 6.1.1.4'
'N'  'N'   0.0061   0.0033
'International Tables Vol C Tables 4.2.6.8 and 6.1.1.4'
'C'  'C'   0.0033   0.0016
'International Tables Vol C Tables 4.2.6.8 and 6.1.1.4'
'H'  'H'   0.0000   0.0000
'International Tables Vol C Tables 4.2.6.8 and 6.1.1.4'

_symmetry_cell_setting            'Orthorhombic'
_symmetry_space_group_name_H-M    'P2(1)2(1)2(1)'
_symmetry_Int_Tables_number      19


loop_
_symmetry_equiv_pos_as_xyz
'x, y, z'
'-x+1/2, -y, z+1/2'
'x+1/2, -y+1/2, -z'
'-x, y+1/2, -z+1/2'

_cell_length_a                    11.6109(18)
_cell_length_b                    23.191(4)
_cell_length_c                    32.917(5)
_cell_angle_alpha                 90.00
_cell_angle_beta                  90.00
_cell_angle_gamma                 90.00
_cell_volume                      8864(2)
_cell_formula_units_Z             4
_cell_measurement_temperature     293(2)
_cell_measurement_reflns_used     3504
_cell_measurement_theta_min       2.14
_cell_measurement_theta_max       26.07

_exptl_crystal_description        plate
_exptl_crystal_colour             yellow
_exptl_crystal_size_max           0.34
_exptl_crystal_size_mid           0.33
_exptl_crystal_size_min           0.06
_exptl_crystal_density_meas       ?
_exptl_crystal_density_diffrn     1.407
_exptl_crystal_density_method     'not measured'
_exptl_crystal_F_000              3736
_exptl_absorpt_coefficient_mu     1.929
_exptl_absorpt_correction_type    SADABS
_exptl_absorpt_correction_T_min   0.5600
_exptl_absorpt_correction_T_max   0.8930
_exptl_absorpt_process_details    ?

_exptl_special_details
;
?
;

_diffrn_ambient_temperature       293(2)
_diffrn_radiation_wavelength      0.71073
_diffrn_radiation_type            MoK\a
_diffrn_radiation_source          'fine-focus sealed tube'
_diffrn_radiation_monochromator   graphite
_diffrn_measurement_device_type   'SMART CCD-1000 Bruker'
_diffrn_measurement_method        'omega scans'
_diffrn_detector_area_resol_mean  ?
_diffrn_standards_number          ?
_diffrn_standards_interval_count  ?
_diffrn_standards_interval_time   ?
_diffrn_standards_decay_%         0
_diffrn_reflns_number             18160
_diffrn_reflns_av_R_equivalents   0.0000
_diffrn_reflns_av_sigmaI/netI     0.1976
_diffrn_reflns_limit_h_min        -14
_diffrn_reflns_limit_h_max        14
_diffrn_reflns_limit_k_min        -28
_diffrn_reflns_limit_k_max        0
_diffrn_reflns_limit_l_min        -41
_diffrn_reflns_limit_l_max        0
_diffrn_reflns_theta_min          1.07
_diffrn_reflns_theta_max          26.49
_reflns_number_total              18160
_reflns_number_gt                 6605
_reflns_threshold_expression      >2sigma(I)

_computing_data_collection        'SMART-Software (Bruker, 1998)'
_computing_cell_refinement        'SMART-Software (Bruker, 1998)'
_computing_data_reduction         'SAINT-Software (Bruker, 1998)'
_computing_structure_solution     'SHELXS-97 (Sheldrick, 1990)'
_computing_structure_refinement   'SHELXL-97 (Sheldrick, 1997)'
_computing_molecular_graphics     'PLATON (Spek, 2000)'
_computing_publication_material   'SHELXL-97 (Sheldrick, 1997)'

_refine_special_details
;
Refinement of F^2^ against ALL reflections.  The weighted R-factor wR
and
goodness of fit S are based on F^2^, conventional R-factors R are based
on F, with F set to zero for negative F^2^. The threshold expression of
F^2^ > 2sigma(F^2^) is used only for calculating R-factors(gt) etc. and
is
not relevant to the choice of reflections for refinement.  R-factors
based
on F^2^ are statistically about twice as large as those based on F, and
R-
factors based on ALL data will be even larger.
;

_refine_ls_structure_factor_coef  Fsqd
_refine_ls_matrix_type            full
_refine_ls_weighting_scheme       calc
_refine_ls_weighting_details
'calc w=1/[\s^2^(Fo^2^)+(0.1093P)^2^+0.0000P] where P=(Fo^2^+2Fc^2^)/3'
_atom_sites_solution_primary      direct
_atom_sites_solution_secondary    difmap
_atom_sites_solution_hydrogens    geom
_refine_ls_hydrogen_treatment     noref
_refine_ls_extinction_method      SHELXL
_refine_ls_extinction_coef        0.00412(19)
_refine_ls_extinction_expression
'Fc^*^=kFc[1+0.001xFc^2^\l^3^/sin(2\q)]^-1/4^'
_refine_ls_abs_structure_details
'Flack H D (1983), Acta Cryst. A39, 876-881'
_refine_ls_abs_structure_Flack    0.00(3)
_refine_ls_number_reflns          18160
_refine_ls_number_parameters      876
_refine_ls_number_restraints      0
_refine_ls_R_factor_all           0.1814
_refine_ls_R_factor_gt            0.0724
_refine_ls_wR_factor_ref          0.2126
_refine_ls_wR_factor_gt           0.1635
_refine_ls_goodness_of_fit_ref    0.822
_refine_ls_restrained_S_all       0.822
_refine_ls_shift/su_max           0.001
_refine_ls_shift/su_mean          0.000

loop_
_atom_site_label
_atom_site_type_symbol
_atom_site_fract_x
_atom_site_fract_y
_atom_site_fract_z
_atom_site_U_iso_or_equiv
_atom_site_adp_type
_atom_site_occupancy
_atom_site_symmetry_multiplicity
_atom_site_calc_flag
_atom_site_refinement_flags
_atom_site_disorder_assembly
_atom_site_disorder_group
Cu1 Cu 0.14971(15) -0.42198(8) -0.72134(6) 0.0589(5) Uani 1 1 d . . .
Cu2 Cu 0.27137(14) -0.52806(8) -0.76624(5) 0.0543(5) Uani 1 1 d . . .
Cu3 Cu 0.33159(19) -0.58984(9) -0.57668(6) 0.0689(6) Uani 1 1 d . . .
I1 I 0.07742(9) -0.53262(4) -0.71981(3) 0.0596(3) Uani 1 1 d . . .
I2 I 0.37571(8) -0.42844(4) -0.74473(3) 0.0585(3) Uani 1 1 d . . .
I3 I 0.41627(17) -0.63022(7) -0.50551(4) 0.1154(6) Uani 1 1 d . . .
S1 S 0.1384(5) -0.5632(2) -0.56476(16) 0.0855(15) Uani 1 1 d . . .
P11 P 0.0680(4) -0.37566(16) -0.77355(13) 0.0564(10) Uani 1 1 d . . .
P12 P 0.2029(4) -0.51502(17) -0.82983(13) 0.0561(11) Uani 1 1 d . . .
P21 P 0.1575(4) -0.39849(17) -0.65516(14) 0.0595(11) Uani 1 1 d . . .
P22 P 0.4248(4) -0.50726(19) -0.59511(13) 0.0650(11) Uani 1 1 d . . .
P31 P 0.3940(3) -0.60023(16) -0.74974(13) 0.0555(10) Uani 1 1 d . . .
P32 P 0.3314(4) -0.66311(19) -0.62288(13) 0.0622(12) Uani 1 1 d . . .
N131 N 0.1040(19) -0.6593(7) -0.5212(5) 0.118(7) Uani 1 1 d . . .
H131 H 0.1767 -0.6649 -0.5244 0.142 Uiso 1 1 d R . .
C1 C 0.1243(14) -0.3992(5) -0.8209(4) 0.053(4) Uani 1 1 d . . .
H1A H 0.0981 -0.3732 -0.8421 0.063 Uiso 1 1 d R . .
H1B H 0.2077 -0.3971 -0.8200 0.063 Uiso 1 1 d R . .
C2 C 0.0870(13) -0.4640(6) -0.8326(5) 0.067(4) Uani 1 1 d . . .
H2A H 0.0561 -0.4641 -0.8600 0.080 Uiso 1 1 d R . .
H2B H 0.0260 -0.4763 -0.8144 0.080 Uiso 1 1 d R . .
C3 C 0.2271(13) -0.4538(6) -0.6228(4) 0.058(4) Uani 1 1 d . . .
H3A H 0.2210 -0.4422 -0.5945 0.069 Uiso 1 1 d R . .
H3B H 0.1865 -0.4901 -0.6259 0.069 Uiso 1 1 d R . .
C4 C 0.3550(13) -0.4628(7) -0.6335(5) 0.067(5) Uani 1 1 d . . .
H4A H 0.3934 -0.4257 -0.6351 0.080 Uiso 1 1 d R . .
H4B H 0.3612 -0.4813 -0.6598 0.080 Uiso 1 1 d R . .
C5 C 0.4175(14) -0.6131(6) -0.6960(4) 0.061(4) Uani 1 1 d . . .
H5A H 0.4854 -0.6370 -0.6926 0.073 Uiso 1 1 d R . .
H5B H 0.4315 -0.5766 -0.6825 0.073 Uiso 1 1 d R . .
C6 C 0.3143(13) -0.6429(7) -0.6762(4) 0.061(4) Uani 1 1 d . . .
H6A H 0.2969 -0.6774 -0.6916 0.073 Uiso 1 1 d R . .
H6B H 0.2483 -0.6174 -0.6784 0.073 Uiso 1 1 d R . .
C11 C -0.0884(11) -0.3811(6) -0.7815(5) 0.051(4) Uani 1 1 d . . .
C12 C -0.1374(14) -0.3654(7) -0.8168(6) 0.075(5) Uani 1 1 d . . .
H12 H -0.0925 -0.3472 -0.8364 0.090 Uiso 1 1 d R . .
C13 C -0.2536(17) -0.3754(9) -0.8249(7) 0.088(6) Uani 1 1 d . . .
H13 H -0.2867 -0.3689 -0.8502 0.106 Uiso 1 1 d R . .
C14 C -0.3128(16) -0.3952(7) -0.7935(7) 0.082(6) Uani 1 1 d . . .
H14 H -0.3918 -0.3989 -0.7973 0.099 Uiso 1 1 d R . .
C15 C -0.2716(15) -0.4109(8) -0.7555(6) 0.085(6) Uani 1 1 d . . .
H15 H -0.3175 -0.4254 -0.7347 0.102 Uiso 1 1 d R . .
C16 C -0.1526(14) -0.4024(6) -0.7524(5) 0.069(5) Uani 1 1 d . . .
H16 H -0.1168 -0.4124 -0.7281 0.082 Uiso 1 1 d R . .
C21 C 0.0940(15) -0.2973(6) -0.7779(5) 0.065(4) Uani 1 1 d . . .
C22 C 0.2031(13) -0.2800(7) -0.7850(6) 0.074(5) Uani 1 1 d . . .
H22 H 0.2620 -0.3070 -0.7874 0.089 Uiso 1 1 d R . .
C23 C 0.227(2) -0.2216(10) -0.7886(10) 0.144(12) Uani 1 1 d . . .
H23 H 0.2964 -0.2089 -0.7991 0.173 Uiso 1 1 d R . .
C24 C 0.143(3) -0.1827(9) -0.7762(8) 0.128(9) Uani 1 1 d . . .
H24 H 0.1650 -0.1444 -0.7723 0.153 Uiso 1 1 d R . .
C25 C 0.0232(19) -0.1982(7) -0.7689(7) 0.099(7) Uani 1 1 d . . .
H25 H -0.0354 -0.1713 -0.7655 0.119 Uiso 1 1 d R . .
C26 C 0.0052(15) -0.2586(7) -0.7674(5) 0.076(5) Uani 1 1 d . . .
H26 H -0.0661 -0.2730 -0.7594 0.091 Uiso 1 1 d R . .
C31 C 0.1371(13) -0.5769(6) -0.8512(4) 0.052(4) Uani 1 1 d . . .
C32 C 0.0321(14) -0.5996(8) -0.8356(6) 0.078(5) Uani 1 1 d . . .
H32 H -0.0033 -0.5796 -0.8145 0.094 Uiso 1 1 d R . .
C33 C -0.020(2) -0.6479(9) -0.8493(8) 0.116(8) Uani 1 1 d . . .
H33 H -0.0905 -0.6595 -0.8391 0.139 Uiso 1 1 d R . .
C34 C 0.036(3) -0.6798(10) -0.8791(8) 0.114(9) Uani 1 1 d . . .
H34 H 0.0028 -0.7135 -0.8888 0.137 Uiso 1 1 d R . .
C35 C 0.135(3) -0.6628(9) -0.8935(7) 0.127(10) Uani 1 1 d . . .
H35 H 0.1718 -0.6861 -0.9124 0.152 Uiso 1 1 d R . .
C36 C 0.188(2) -0.6103(8) -0.8817(7) 0.102(7) Uani 1 1 d . . .
H36 H 0.2564 -0.5984 -0.8940 0.122 Uiso 1 1 d R . .
C41 C 0.2941(14) -0.4865(6) -0.8701(5) 0.061(4) Uani 1 1 d . . .
C42 C 0.2626(16) -0.4751(8) -0.9084(5) 0.077(5) Uani 1 1 d . . .
H42 H 0.1867 -0.4821 -0.9160 0.092 Uiso 1 1 d R . .
C43 C 0.338(2) -0.4535(8) -0.9371(7) 0.099(7) Uani 1 1 d . . .
H43 H 0.3118 -0.4466 -0.9634 0.119 Uiso 1 1 d R . .
C44 C 0.445(2) -0.4427(11) -0.9277(8) 0.123(9) Uani 1 1 d . . .
H44 H 0.4927 -0.4244 -0.9466 0.147 Uiso 1 1 d R . .
C45 C 0.4913(18) -0.4584(9) -0.8889(6) 0.097(7) Uani 1 1 d . . .
H45 H 0.5693 -0.4546 -0.8831 0.116 Uiso 1 1 d R . .
C46 C 0.4143(18) -0.4793(7) -0.8606(5) 0.081(5) Uani 1 1 d . . .
H46 H 0.4407 -0.4891 -0.8348 0.097 Uiso 1 1 d R . .
C51 C 0.0214(13) -0.3901(6) -0.6281(5) 0.058(4) Uani 1 1 d . . .
C52 C -0.0431(17) -0.3400(8) -0.6340(7) 0.099(7) Uani 1 1 d . . .
H52 H -0.0145 -0.3098 -0.6496 0.119 Uiso 1 1 d R . .
C53 C -0.151(2) -0.3362(13) -0.6159(11) 0.176(14) Uani 1 1 d . . .
H53 H -0.1992 -0.3062 -0.6235 0.211 Uiso 1 1 d R . .
C54 C -0.1870(17) -0.3732(10) -0.5886(8) 0.102(7) Uani 1 1 d . . .
H54 H -0.2502 -0.3649 -0.5722 0.122 Uiso 1 1 d R . .
C55 C -0.132(2) -0.4214(11) -0.5852(9) 0.143(10) Uani 1 1 d . . .
H55 H -0.1604 -0.4504 -0.5684 0.172 Uiso 1 1 d R . .
C56 C -0.0293(16) -0.4297(10) -0.6069(8) 0.122(9) Uani 1 1 d . . .
H56 H 0.0046 -0.4660 -0.6061 0.147 Uiso 1 1 d R . .
C61 C 0.2280(15) -0.3323(8) -0.6434(6) 0.072(5) Uani 1 1 d . . .
C62 C 0.2527(16) -0.2938(8) -0.6728(6) 0.083(6) Uani 1 1 d . . .
H62 H 0.2379 -0.3028 -0.6998 0.100 Uiso 1 1 d R . .
C63 C 0.300(2) -0.2408(9) -0.6629(7) 0.108(8) Uani 1 1 d . . .
H63 H 0.3065 -0.2132 -0.6833 0.129 Uiso 1 1 d R . .
C64 C 0.338(3) -0.2270(12) -0.6259(11) 0.167(13) Uani 1 1 d . . .
H64 H 0.3788 -0.1932 -0.6213 0.200 Uiso 1 1 d R . .
C65 C 0.314(3) -0.2643(12) -0.5949(9) 0.20(2) Uani 1 1 d . . .
H65 H 0.3326 -0.2544 -0.5684 0.243 Uiso 1 1 d R . .
C66 C 0.258(3) -0.3193(11) -0.6031(8) 0.153(12) Uani 1 1 d . . .
H66 H 0.2437 -0.3453 -0.5822 0.184 Uiso 1 1 d R . .
C71 C 0.4413(16) -0.4540(7) -0.5553(6) 0.073(5) Uani 1 1 d . . .
C72 C 0.505(2) -0.4040(10) -0.5621(7) 0.113(8) Uani 1 1 d . . .
H72 H 0.5420 -0.3989 -0.5869 0.135 Uiso 1 1 d R . .
C73 C 0.515(2) -0.3628(11) -0.5330(9) 0.143(11) Uani 1 1 d . . .
H73 H 0.5558 -0.3293 -0.5384 0.172 Uiso 1 1 d R . .
C74 C 0.466(3) -0.3696(14) -0.4983(10) 0.179(15) Uani 1 1 d . . .
H74 H 0.4868 -0.3453 -0.4771 0.215 Uiso 1 1 d R . .
C75 C 0.381(2) -0.4146(12) -0.4913(8) 0.145(10) Uani 1 1 d . . .
H75 H 0.3312 -0.4149 -0.4691 0.174 Uiso 1 1 d R . .
C76 C 0.381(2) -0.4555(10) -0.5199(6) 0.115(8) Uani 1 1 d . . .
H76 H 0.3366 -0.4880 -0.5151 0.138 Uiso 1 1 d R . .
C81 C 0.5693(15) -0.5177(7) -0.6145(5) 0.069(5) Uani 1 1 d . . .
C82 C 0.6207(18) -0.4856(9) -0.6434(6) 0.090(6) Uani 1 1 d . . .
H82 H 0.5803 -0.4551 -0.6549 0.108 Uiso 1 1 d R . .
C83 C 0.727(2) -0.4961(10) -0.6560(7) 0.115(8) Uani 1 1 d . . .
H83 H 0.7636 -0.4711 -0.6739 0.138 Uiso 1 1 d R . .
C84 C 0.783(2) -0.5451(12) -0.6418(8) 0.122(9) Uani 1 1 d . . .
H84 H 0.8557 -0.5524 -0.6526 0.146 Uiso 1 1 d R . .
C85 C 0.744(2) -0.5829(13) -0.6145(9) 0.138(10) Uani 1 1 d . . .
H85 H 0.7818 -0.6162 -0.6061 0.166 Uiso 1 1 d R . .
C86 C 0.6345(18) -0.5636(10) -0.6004(7) 0.116(8) Uani 1 1 d . . .
H86 H 0.6028 -0.5844 -0.5789 0.139 Uiso 1 1 d R . .
C91 C 0.5356(12) -0.5870(6) -0.7718(5) 0.056(4) Uani 1 1 d . . .
C92 C 0.6307(15) -0.5681(7) -0.7495(7) 0.093(6) Uani 1 1 d . . .
H92 H 0.6262 -0.5681 -0.7213 0.111 Uiso 1 1 d R . .
C93 C 0.7303(19) -0.5495(8) -0.7675(6) 0.087(7) Uani 1 1 d . . .
H93 H 0.7892 -0.5335 -0.7520 0.104 Uiso 1 1 d R . .
C94 C 0.7405(18) -0.5546(8) -0.8063(9) 0.101(8) Uani 1 1 d . . .
H94 H 0.8095 -0.5441 -0.8185 0.121 Uiso 1 1 d R . .
C95 C 0.658(2) -0.5739(9) -0.8287(7) 0.105(7) Uani 1 1 d . . .
H95 H 0.6684 -0.5769 -0.8566 0.126 Uiso 1 1 d R . .
C96 C 0.5534(18) -0.5901(8) -0.8120(6) 0.091(6) Uani 1 1 d . . .
H96 H 0.4949 -0.6035 -0.8288 0.109 Uiso 1 1 d R . .
C101 C 0.3730(16) -0.6750(7) -0.7686(5) 0.067(5) Uani 1 1 d . . .
C102 C 0.2654(18) -0.6837(7) -0.7857(5) 0.080(6) Uani 1 1 d . . .
H102 H 0.2127 -0.6536 -0.7876 0.096 Uiso 1 1 d R . .
C103 C 0.237(2) -0.7404(9) -0.8005(7) 0.107(7) Uani 1 1 d . . .
H103 H 0.1646 -0.7483 -0.8111 0.129 Uiso 1 1 d R . .
C104 C 0.325(3) -0.7845(10) -0.7984(7) 0.121(9) Uani 1 1 d . . .
H104 H 0.3103 -0.8216 -0.8080 0.145 Uiso 1 1 d R . .
C105 C 0.424(2) -0.7714(8) -0.7830(8) 0.111(8) Uani 1 1 d . . .
H105 H 0.4814 -0.7992 -0.7827 0.133 Uiso 1 1 d R . .
C106 C 0.4487(16) -0.7154(8) -0.7662(6) 0.095(7) Uani 1 1 d . . .
H106 H 0.5192 -0.7085 -0.7537 0.114 Uiso 1 1 d R . .
C111 C 0.4431(14) -0.7163(7) -0.6249(4) 0.054(4) Uani 1 1 d . . .
C112 C 0.5368(17) -0.7118(11) -0.5982(6) 0.108(8) Uani 1 1 d . . .
H112 H 0.5379 -0.6814 -0.5797 0.130 Uiso 1 1 d R . .
C113 C 0.632(2) -0.7522(12) -0.5982(9) 0.162(13) Uani 1 1 d . . .
H113 H 0.6937 -0.7494 -0.5803 0.195 Uiso 1 1 d R . .
C114 C 0.623(2) -0.7970(9) -0.6281(8) 0.120(9) Uani 1 1 d . . .
H114 H 0.6809 -0.8246 -0.6294 0.144 Uiso 1 1 d R . .
C115 C 0.534(2) -0.8010(10) -0.6546(8) 0.103(8) Uani 1 1 d . . .
H115 H 0.5317 -0.8309 -0.6734 0.124 Uiso 1 1 d R . .
C116 C 0.4486(19) -0.7609(8) -0.6536(7) 0.093(6) Uani 1 1 d . . .
H116 H 0.3904 -0.7633 -0.6729 0.112 Uiso 1 1 d R . .
C121 C 0.2058(14) -0.7095(7) -0.6151(5) 0.061(4) Uani 1 1 d . . .
C122 C 0.2159(19) -0.7570(8) -0.5918(5) 0.082(6) Uani 1 1 d . . .
H122 H 0.2874 -0.7690 -0.5822 0.098 Uiso 1 1 d R . .
C123 C 0.116(2) -0.7878(8) -0.5823(5) 0.080(6) Uani 1 1 d . . .
H123 H 0.1224 -0.8199 -0.5655 0.096 Uiso 1 1 d R . .
C124 C 0.012(2) -0.7735(10) -0.5961(7) 0.095(7) Uani 1 1 d . . .
H124 H -0.0513 -0.7960 -0.5894 0.115 Uiso 1 1 d R . .
C125 C -0.001(2) -0.7263(11) -0.6198(8) 0.109(8) Uani 1 1 d . . .
H125 H -0.0732 -0.7159 -0.6295 0.131 Uiso 1 1 d R . .
C126 C 0.0948(16) -0.6938(8) -0.6292(6) 0.080(5) Uani 1 1 d . . .
H126 H 0.0864 -0.6610 -0.6452 0.097 Uiso 1 1 d R . .
C132 C 0.0643(19) -0.6107(8) -0.5383(5) 0.080(5) Uani 1 1 d . . .
C133 C -0.057(2) -0.6100(11) -0.5333(8) 0.132(9) Uani 1 1 d . . .
H133 H -0.1011 -0.5811 -0.5453 0.159 Uiso 1 1 d R . .
C134 C -0.114(4) -0.656(2) -0.5092(16) 0.29(4) Uani 1 1 d . . .
H134 H -0.1892 -0.6512 -0.4999 0.344 Uiso 1 1 d R . .
C135 C -0.059(5) -0.698(2) -0.5017(17) 0.29(4) Uani 1 1 d . . .
H135 H -0.1012 -0.7322 -0.4975 0.345 Uiso 1 1 d R . .
C136 C 0.049(4) -0.7020(13) -0.4993(9) 0.180(16) Uani 1 1 d . . .
H136 H 0.0871 -0.7302 -0.4844 0.216 Uiso 1 1 d R . .

loop_
_atom_site_aniso_label
_atom_site_aniso_U_11
_atom_site_aniso_U_22
_atom_site_aniso_U_33
_atom_site_aniso_U_23
_atom_site_aniso_U_13
_atom_site_aniso_U_12
Cu1 0.0548(11) 0.0478(10) 0.0742(12) 0.0102(10) 0.0022(10) -0.0007(9)
Cu2 0.0433(10) 0.0515(11) 0.0681(13) 0.0045(9) 0.0038(9) 0.0004(9)
Cu3 0.0751(15) 0.0662(14) 0.0654(13) 0.0110(10) 0.0028(11) 0.0078(11)
I1 0.0467(5) 0.0471(5) 0.0850(7) 0.0070(5) 0.0118(6) -0.0034(5)
I2 0.0445(5) 0.0552(6) 0.0757(7) 0.0021(5) 0.0039(5) -0.0065(5)
I3 0.1563(16) 0.1191(12) 0.0708(9) 0.0163(8) -0.0048(9) 0.0645(12)
S1 0.082(3) 0.070(3) 0.104(4) 0.021(3) 0.008(3) 0.009(3)
P11 0.049(2) 0.051(2) 0.069(3) 0.004(2) 0.006(2) -0.005(2)
P12 0.049(2) 0.049(2) 0.071(3) 0.001(2) 0.001(2) 0.0020(19)
P21 0.051(3) 0.047(2) 0.081(3) 0.004(2) 0.004(2) 0.002(2)
P22 0.061(3) 0.070(3) 0.064(3) 0.000(2) -0.004(2) 0.006(2)
P31 0.047(2) 0.052(2) 0.067(3) 0.008(2) 0.006(2) 0.0005(18)
P32 0.056(3) 0.067(3) 0.063(3) 0.007(2) 0.003(2) 0.006(2)
N131 0.18(2) 0.078(12) 0.093(12) 0.021(10) 0.061(14) 0.035(13)
C1 0.064(10) 0.036(8) 0.058(9) -0.001(7) 0.015(8) 0.014(7)
C2 0.049(9) 0.068(10) 0.083(11) -0.010(9) 0.026(9) 0.019(9)
C3 0.055(10) 0.060(10) 0.058(10) 0.004(8) -0.024(8) 0.001(8)
C4 0.051(10) 0.060(10) 0.089(12) -0.015(9) -0.012(9) 0.022(9)
C5 0.064(10) 0.050(9) 0.069(10) 0.010(8) 0.011(9) 0.006(8)
C6 0.051(9) 0.074(11) 0.057(10) 0.030(8) 0.012(8) 0.014(8)
C11 0.023(7) 0.060(9) 0.069(10) -0.015(8) 0.000(8) -0.003(7)
C12 0.042(10) 0.070(11) 0.112(15) 0.008(11) 0.001(11) 0.016(9)
C13 0.069(14) 0.097(15) 0.099(16) 0.019(13) -0.016(12) 0.013(12)
C14 0.060(12) 0.068(12) 0.119(18) 0.015(12) -0.017(12) 0.008(9)
C15 0.060(11) 0.099(14) 0.095(15) 0.016(12) 0.037(12) 0.003(10)
C16 0.064(11) 0.060(10) 0.082(12) 0.009(9) 0.028(11) -0.003(8)
C21 0.072(12) 0.048(9) 0.074(11) 0.009(8) -0.024(10) -0.004(8)
C22 0.037(9) 0.057(11) 0.128(16) 0.007(10) -0.013(10) -0.013(8)
C23 0.083(16) 0.071(15) 0.28(4) -0.023(19) -0.04(2) -0.022(13)
C24 0.18(3) 0.067(14) 0.14(2) 0.045(14) -0.04(2) -0.025(17)
C25 0.098(15) 0.040(10) 0.16(2) 0.019(11) 0.036(15) -0.002(10)
C26 0.078(12) 0.056(11) 0.094(14) -0.026(9) 0.037(11) -0.015(9)
C31 0.054(9) 0.041(8) 0.062(9) 0.001(8) -0.023(8) -0.008(8)
C32 0.051(10) 0.075(13) 0.108(15) -0.031(11) 0.001(10) -0.004(9)
C33 0.13(2) 0.060(14) 0.16(2) -0.025(14) 0.003(18) -0.017(13)
C34 0.15(3) 0.064(15) 0.13(2) 0.004(15) -0.036(19) -0.011(16)
C35 0.22(3) 0.068(15) 0.091(16) -0.002(12) 0.02(2) -0.038(18)
C36 0.129(19) 0.053(12) 0.123(18) -0.012(12) -0.008(15) -0.002(12)
C41 0.051(10) 0.050(10) 0.082(12) 0.002(8) 0.008(10) 0.006(8)
C42 0.066(12) 0.107(15) 0.058(11) 0.015(11) 0.001(10) 0.010(11)
C43 0.13(2) 0.072(13) 0.091(15) 0.036(11) -0.006(16) -0.003(13)
C44 0.10(2) 0.16(2) 0.11(2) 0.019(16) -0.009(16) -0.043(17)
C45 0.070(13) 0.144(19) 0.077(14) -0.008(13) 0.024(12) -0.018(13)
C46 0.093(15) 0.069(12) 0.079(12) 0.028(10) 0.017(12) 0.000(11)
C51 0.044(9) 0.043(9) 0.086(12) 0.001(8) 0.022(9) 0.001(7)
C52 0.078(15) 0.084(14) 0.134(19) 0.033(12) 0.024(13) 0.034(11)
C53 0.063(16) 0.17(3) 0.29(4) 0.04(3) 0.06(2) 0.059(18)
C54 0.055(13) 0.099(18) 0.15(2) 0.013(15) 0.038(13) -0.011(13)
C55 0.098(18) 0.104(18) 0.23(3) 0.045(19) 0.06(2) 0.019(17)
C56 0.053(12) 0.114(18) 0.20(3) 0.062(18) 0.036(15) -0.004(13)
C61 0.062(12) 0.079(13) 0.073(13) -0.005(11) 0.000(10) -0.008(10)
C62 0.092(15) 0.078(13) 0.079(13) 0.006(11) 0.017(11) -0.039(12)
C63 0.16(2) 0.069(15) 0.090(16) 0.009(12) 0.019(17) -0.025(15)
C64 0.22(4) 0.10(2) 0.18(3) 0.01(2) -0.02(3) 0.05(2)
C65 0.37(6) 0.088(19) 0.15(3) -0.001(18) -0.15(3) -0.05(3)
C66 0.25(4) 0.11(2) 0.11(2) -0.011(16) -0.04(2) -0.02(2)
C71 0.067(12) 0.063(11) 0.089(13) -0.013(9) -0.023(11) 0.000(10)
C72 0.113(18) 0.108(18) 0.118(18) -0.026(15) 0.021(14) -0.044(15)
C73 0.17(3) 0.13(2) 0.13(2) -0.061(19) 0.05(2) -0.084(19)
C74 0.22(4) 0.19(3) 0.13(2) -0.07(2) 0.01(2) -0.10(3)
C75 0.12(2) 0.15(2) 0.16(3) -0.04(2) 0.064(19) -0.024(19)
C76 0.15(2) 0.121(18) 0.074(13) -0.040(13) 0.052(15) 0.016(16)
C81 0.062(11) 0.087(13) 0.057(10) -0.009(9) 0.010(9) 0.007(10)
C82 0.068(13) 0.124(17) 0.080(13) 0.015(12) 0.007(12) 0.020(13)
C83 0.12(2) 0.112(19) 0.111(18) 0.022(14) -0.030(17) 0.025(17)
C84 0.086(17) 0.16(3) 0.11(2) -0.018(18) 0.005(16) 0.035(18)
C85 0.089(18) 0.19(3) 0.14(2) 0.03(2) 0.024(16) 0.03(2)
C86 0.078(14) 0.15(2) 0.118(17) 0.038(16) -0.003(14) 0.044(15)
C91 0.042(8) 0.059(10) 0.067(11) 0.001(8) 0.001(8) -0.007(7)
C92 0.060(10) 0.066(11) 0.151(18) 0.029(12) 0.012(13) -0.017(10)
C93 0.105(17) 0.092(14) 0.064(12) 0.013(11) 0.009(12) -0.034(12)
C94 0.052(12) 0.079(15) 0.17(3) -0.017(16) -0.002(16) 0.004(11)
C95 0.12(2) 0.092(16) 0.099(16) 0.008(13) 0.043(16) 0.025(16)
C96 0.089(15) 0.089(14) 0.093(14) -0.015(11) 0.054(13) 0.003(11)
C101 0.069(11) 0.061(10) 0.070(11) 0.028(8) 0.017(10) -0.016(10)
C102 0.108(16) 0.048(10) 0.084(13) 0.010(9) 0.008(12) -0.026(10)
C103 0.092(16) 0.067(14) 0.16(2) 0.005(14) -0.016(15) -0.009(13)
C104 0.17(3) 0.070(15) 0.12(2) 0.007(13) 0.001(19) -0.026(18)
C105 0.092(15) 0.054(12) 0.19(2) -0.037(14) -0.001(18) -0.010(12)
C106 0.068(12) 0.077(13) 0.141(19) 0.009(12) 0.033(12) 0.019(11)
C111 0.058(10) 0.068(11) 0.037(8) 0.002(7) -0.004(8) 0.013(9)
C112 0.088(16) 0.17(2) 0.062(13) -0.009(13) 0.000(12) 0.035(16)
C113 0.106(19) 0.18(3) 0.21(3) -0.07(2) -0.03(2) 0.11(2)
C114 0.12(2) 0.072(15) 0.17(2) 0.025(15) 0.05(2) 0.035(16)
C115 0.071(14) 0.079(16) 0.16(2) 0.007(14) 0.013(16) -0.018(13)
C116 0.089(16) 0.061(12) 0.129(18) -0.003(12) 0.005(14) 0.022(11)
C121 0.056(11) 0.055(10) 0.073(11) -0.018(9) 0.005(9) 0.003(8)
C122 0.104(16) 0.078(13) 0.063(12) 0.026(10) 0.011(11) -0.003(12)
C123 0.106(17) 0.063(11) 0.071(12) 0.018(9) 0.013(13) -0.007(12)
C124 0.097(18) 0.087(17) 0.103(18) -0.012(13) -0.004(15) -0.025(14)
C125 0.074(15) 0.12(2) 0.13(2) -0.039(17) 0.010(15) -0.020(15)
C126 0.064(13) 0.087(13) 0.090(13) 0.002(10) 0.007(11) -0.025(11)
C132 0.092(15) 0.080(13) 0.068(12) 0.004(10) 0.022(11) -0.026(12)
C133 0.070(16) 0.15(2) 0.18(3) -0.008(19) -0.004(17) -0.045(16)
C134 0.21(4) 0.29(6) 0.36(6) -0.20(5) 0.23(5) -0.16(4)
C135 0.22(5) 0.31(7) 0.33(6) -0.28(6) 0.10(5) -0.04(5)
C136 0.28(5) 0.11(2) 0.15(3) 0.07(2) 0.03(3) -0.01(3)

_geom_special_details
;
All esds (except the esd in the dihedral angle between two l.s. planes)
are estimated using the full covariance matrix.  The cell esds are
taken
into account individually in the estimation of esds in distances,
angles
and torsion angles; correlations between esds in cell parameters are
only
used when they are defined by crystal symmetry.  An approximate
(isotropic)
treatment of cell esds is used for estimating esds involving l.s.
planes.
;

loop_
_geom_bond_atom_site_label_1
_geom_bond_atom_site_label_2
_geom_bond_distance
_geom_bond_site_symmetry_2
_geom_bond_publ_flag
Cu1 P11 2.238(5) . y
Cu1 P21 2.247(5) . y
Cu1 I1 2.700(2) . y
Cu1 I2 2.739(2) . y
Cu1 Cu2 3.199(3) . y
Cu1 Cu3 6.503(3) . y
Cu2 P12 2.260(5) . y
Cu2 P31 2.263(4) . y
Cu2 I2 2.703(2) . y
Cu2 I1 2.723(2) . y
Cu2 Cu3 6.440(3) . y
Cu3 P32 2.281(5) . y
Cu3 P22 2.282(5) . y
Cu3 S1 2.359(6) . y
Cu3 I3 2.708(2) . y
I1 I2 4.3018(14) . y
S1 C132 1.648(18) . ?
P11 C1 1.777(13) . ?
P11 C11 1.839(14) . ?
P11 C21 1.849(15) . ?
P12 C31 1.772(14) . ?
P12 C2 1.793(15) . ?
P12 C41 1.820(17) . ?
P21 C61 1.783(18) . ?
P21 C51 1.823(15) . ?
P21 C3 1.854(14) . ?
P22 C81 1.811(18) . ?
P22 C71 1.810(17) . ?
P22 C4 1.820(15) . ?
P31 C5 1.813(15) . ?
P31 C91 1.823(15) . ?
P31 C101 1.858(17) . ?
P32 C111 1.791(15) . ?
P32 C6 1.827(14) . ?
P32 C121 1.830(17) . ?
N131 C132 1.34(2) . ?
N131 C136 1.38(3) . ?
N131 H131 0.8600 . ?
C1 C2 1.611(19) . ?
C1 H1A 0.9700 . ?
C1 H1B 0.9700 . ?
C2 H2A 0.9699 . ?
C2 H2B 0.9700 . ?
C3 C4 1.54(2) . ?
C3 H3A 0.9701 . ?
C3 H3B 0.9699 . ?
C4 H4A 0.9700 . ?
C4 H4B 0.9698 . ?
C5 C6 1.53(2) . ?
C5 H5A 0.9701 . ?
C5 H5B 0.9699 . ?
C6 H6A 0.9700 . ?
C6 H6B 0.9700 . ?
C11 C16 1.311(19) . ?
C11 C12 1.34(2) . ?
C12 C13 1.40(2) . ?
C12 H12 0.9300 . ?
C13 C14 1.32(2) . ?
C13 H13 0.9301 . ?
C14 C15 1.39(2) . ?
C14 H14 0.9300 . ?
C15 C16 1.40(2) . ?
C15 H15 0.9301 . ?
C16 H16 0.9298 . ?
C21 C22 1.35(2) . ?
C21 C26 1.41(2) . ?
C22 C23 1.39(3) . ?
C22 H22 0.9301 . ?
C23 C24 1.39(3) . ?
C23 H23 0.9301 . ?
C24 C25 1.46(3) . ?
C24 H24 0.9301 . ?
C25 C26 1.42(2) . ?
C25 H25 0.9300 . ?
C26 H26 0.9301 . ?
C31 C36 1.40(2) . ?
C31 C32 1.42(2) . ?
C32 C33 1.35(2) . ?
C32 H32 0.9300 . ?
C33 C34 1.39(3) . ?
C33 H33 0.9301 . ?
C34 C35 1.30(3) . ?
C34 H34 0.9299 . ?
C35 C36 1.42(3) . ?
C35 H35 0.9300 . ?
C36 H36 0.9300 . ?
C41 C42 1.34(2) . ?
C41 C46 1.44(2) . ?
C42 C43 1.38(2) . ?
C42 H42 0.9300 . ?
C43 C44 1.31(3) . ?
C43 H43 0.9299 . ?
C44 C45 1.43(3) . ?
C44 H44 0.9299 . ?
C45 C46 1.38(2) . ?
C45 H45 0.9300 . ?
C46 H46 0.9301 . ?
C51 C56 1.30(2) . ?
C51 C52 1.40(2) . ?
C52 C53 1.39(3) . ?
C52 H52 0.9301 . ?
C53 C54 1.31(3) . ?
C53 H53 0.9299 . ?
C54 C55 1.29(3) . ?
C54 H54 0.9300 . ?
C55 C56 1.40(3) . ?
C55 H55 0.9300 . ?
C56 H56 0.9301 . ?
C61 C62 1.35(2) . ?
C61 C66 1.40(3) . ?
C62 C63 1.39(3) . ?
C62 H62 0.9299 . ?
C63 C64 1.33(3) . ?
C63 H63 0.9299 . ?
C64 C65 1.37(4) . ?
C64 H64 0.9299 . ?
C65 C66 1.45(3) . ?
C65 H65 0.9300 . ?
C66 H66 0.9301 . ?
C71 C76 1.36(2) . ?
C71 C72 1.39(2) . ?
C72 C73 1.36(3) . ?
C72 H72 0.9297 . ?
C73 C74 1.28(3) . ?
C73 H73 0.9299 . ?
C74 C75 1.46(3) . ?
C74 H74 0.9301 . ?
C75 C76 1.34(3) . ?
C75 H75 0.9300 . ?
C76 H76 0.9301 . ?
C81 C82 1.35(2) . ?
C81 C86 1.39(2) . ?
C82 C83 1.32(3) . ?
C82 H82 0.9299 . ?
C83 C84 1.39(3) . ?
C83 H83 0.9300 . ?
C84 C85 1.34(3) . ?
C84 H84 0.9301 . ?
C85 C86 1.43(3) . ?
C85 H85 0.9299 . ?
C86 H86 0.9301 . ?
C91 C96 1.34(2) . ?
C91 C92 1.40(2) . ?
C92 C93 1.37(2) . ?
C92 H92 0.9304 . ?
C93 C94 1.29(3) . ?
C93 H93 0.9299 . ?
C94 C95 1.29(3) . ?
C94 H94 0.9301 . ?
C95 C96 1.38(3) . ?
C95 H95 0.9299 . ?
C96 H96 0.9300 . ?
C101 C106 1.29(2) . ?
C101 C102 1.39(2) . ?
C102 C103 1.44(2) . ?
C102 H102 0.9301 . ?
C103 C104 1.45(3) . ?
C103 H103 0.9301 . ?
C104 C105 1.29(3) . ?
C104 H104 0.9300 . ?
C105 C106 1.44(2) . ?
C105 H105 0.9299 . ?
C106 H106 0.9300 . ?
C111 C116 1.40(2) . ?
C111 C112 1.40(2) . ?
C112 C113 1.45(3) . ?
C112 H112 0.9299 . ?
C113 C114 1.43(3) . ?
C113 H113 0.9301 . ?
C114 C115 1.35(3) . ?
C114 H114 0.9300 . ?
C115 C116 1.36(3) . ?
C115 H115 0.9302 . ?
C116 H116 0.9301 . ?
C121 C122 1.35(2) . ?
C121 C126 1.42(2) . ?
C122 C123 1.40(3) . ?
C122 H122 0.9301 . ?
C123 C124 1.33(3) . ?
C123 H123 0.9301 . ?
C124 C125 1.35(3) . ?
C124 H124 0.9300 . ?
C125 C126 1.38(3) . ?
C125 H125 0.9300 . ?
C126 H126 0.9300 . ?
C132 C133 1.42(3) . ?
C133 C134 1.48(5) . ?
C133 H133 0.9300 . ?
C134 C135 1.21(9) . ?
C134 H134 0.9302 . ?
C135 C136 1.26(6) . ?
C135 H135 0.9300 . ?
C136 H136 0.9300 . ?

loop_
_geom_angle_atom_site_label_1
_geom_angle_atom_site_label_2
_geom_angle_atom_site_label_3
_geom_angle
_geom_angle_site_symmetry_1
_geom_angle_site_symmetry_3
_geom_angle_publ_flag
P11 Cu1 P21 130.17(17) . . y
P11 Cu1 I1 109.79(13) . . y
P21 Cu1 I1 102.99(12) . . y
P11 Cu1 I2 102.52(13) . . y
P21 Cu1 I2 104.33(13) . . y
I1 Cu1 I2 104.54(7) . . y
P11 Cu1 Cu2 101.64(13) . . ?
P21 Cu1 Cu2 128.07(13) . . ?
I1 Cu1 Cu2 54.20(5) . . ?
I2 Cu1 Cu2 53.48(5) . . ?
P11 Cu1 Cu3 170.89(12) . . ?
P21 Cu1 Cu3 54.71(11) . . ?
I1 Cu1 Cu3 61.21(5) . . ?
I2 Cu1 Cu3 82.07(5) . . ?
Cu2 Cu1 Cu3 74.60(5) . . ?
P12 Cu2 P31 122.87(17) . . y
P12 Cu2 I2 106.62(12) . . y
P31 Cu2 I2 106.70(12) . . y
P12 Cu2 I1 103.53(13) . . y
P31 Cu2 I1 110.90(12) . . y
I2 Cu2 I1 104.89(7) . . y
P12 Cu2 Cu1 99.76(12) . . ?
P31 Cu2 Cu1 137.36(14) . . ?
I2 Cu2 Cu1 54.52(5) . . ?
I1 Cu2 Cu1 53.53(5) . . ?
P12 Cu2 Cu3 164.91(12) . . ?
P31 Cu2 Cu3 62.27(12) . . ?
I2 Cu2 Cu3 83.56(5) . . ?
I1 Cu2 Cu3 62.45(5) . . ?
Cu1 Cu2 Cu3 76.79(5) . . ?
P32 Cu3 P22 116.65(18) . . y
P32 Cu3 S1 107.8(2) . . y
P22 Cu3 S1 105.97(18) . . y
P32 Cu3 I3 108.64(14) . . y
P22 Cu3 I3 110.38(15) . . y
S1 Cu3 I3 106.98(15) . . y
P32 Cu3 Cu2 61.28(12) . . ?
P22 Cu3 Cu2 66.87(12) . . ?
S1 Cu3 Cu2 89.97(13) . . ?
I3 Cu3 Cu2 162.67(7) . . ?
P32 Cu3 Cu1 87.56(12) . . ?
P22 Cu3 Cu1 57.10(12) . . ?
S1 Cu3 Cu1 69.89(13) . . ?
I3 Cu3 Cu1 163.44(7) . . ?
Cu2 Cu3 Cu1 28.61(2) . . ?
Cu1 I1 Cu2 72.28(6) . . y
Cu1 I1 I2 38.05(4) . . ?
Cu2 I1 I2 37.39(4) . . ?
Cu2 I2 Cu1 72.00(6) . . y
Cu2 I2 I1 37.72(4) . . ?
Cu1 I2 I1 37.42(4) . . ?
C132 S1 Cu3 114.1(8) . . ?
C1 P11 C11 102.6(8) . . ?
C1 P11 C21 100.0(7) . . ?
C11 P11 C21 102.6(7) . . ?
C1 P11 Cu1 111.7(5) . . ?
C11 P11 Cu1 119.7(6) . . ?
C21 P11 Cu1 117.5(5) . . ?
C31 P12 C2 101.0(7) . . ?
C31 P12 C41 104.9(8) . . ?
C2 P12 C41 99.2(7) . . ?
C31 P12 Cu2 114.3(5) . . ?
C2 P12 Cu2 113.5(5) . . ?
C41 P12 Cu2 121.2(6) . . ?
C61 P21 C51 101.5(8) . . ?
C61 P21 C3 105.7(8) . . ?
C51 P21 C3 99.9(7) . . ?
C61 P21 Cu1 116.0(7) . . ?
C51 P21 Cu1 117.6(6) . . ?
C3 P21 Cu1 114.0(5) . . ?
C81 P22 C71 104.3(8) . . ?
C81 P22 C4 104.1(8) . . ?
C71 P22 C4 99.3(8) . . ?
C81 P22 Cu3 114.8(6) . . ?
C71 P22 Cu3 115.5(7) . . ?
C4 P22 Cu3 116.7(6) . . ?
C5 P31 C91 106.3(7) . . ?
C5 P31 C101 101.0(7) . . ?
C91 P31 C101 98.2(7) . . ?
C5 P31 Cu2 116.8(5) . . ?
C91 P31 Cu2 110.3(5) . . ?
C101 P31 Cu2 121.9(6) . . ?
C111 P32 C6 102.7(7) . . ?
C111 P32 C121 100.2(8) . . ?
C6 P32 C121 101.4(8) . . ?
C111 P32 Cu3 122.5(5) . . ?
C6 P32 Cu3 116.7(6) . . ?
C121 P32 Cu3 110.3(5) . . ?
C132 N131 C136 131(3) . . ?
C132 N131 H131 114.2 . . ?
C136 N131 H131 114.3 . . ?
C2 C1 P11 113.4(10) . . ?
C2 C1 H1A 108.9 . . ?
P11 C1 H1A 108.9 . . ?
C2 C1 H1B 108.9 . . ?
P11 C1 H1B 108.9 . . ?
H1A C1 H1B 107.7 . . ?
C1 C2 P12 113.7(11) . . ?
C1 C2 H2A 108.8 . . ?
P12 C2 H2A 108.8 . . ?
C1 C2 H2B 108.8 . . ?
P12 C2 H2B 108.8 . . ?
H2A C2 H2B 107.7 . . ?
C4 C3 P21 112.5(11) . . ?
C4 C3 H3A 109.1 . . ?
P21 C3 H3A 109.1 . . ?
C4 C3 H3B 109.1 . . ?
P21 C3 H3B 109.1 . . ?
H3A C3 H3B 107.8 . . ?
C3 C4 P22 110.3(11) . . ?
C3 C4 H4A 109.6 . . ?
P22 C4 H4A 109.6 . . ?
C3 C4 H4B 109.6 . . ?
P22 C4 H4B 109.6 . . ?
H4A C4 H4B 108.1 . . ?
C6 C5 P31 111.9(11) . . ?
C6 C5 H5A 109.2 . . ?
P31 C5 H5A 109.2 . . ?
C6 C5 H5B 109.2 . . ?
P31 C5 H5B 109.2 . . ?
H5A C5 H5B 107.9 . . ?
C5 C6 P32 116.2(11) . . ?
C5 C6 H6A 108.2 . . ?
P32 C6 H6A 108.2 . . ?
C5 C6 H6B 108.2 . . ?
P32 C6 H6B 108.2 . . ?
H6A C6 H6B 107.4 . . ?
C16 C11 C12 119.6(15) . . ?
C16 C11 P11 118.9(14) . . ?
C12 C11 P11 121.5(12) . . ?
C11 C12 C13 122.0(18) . . ?
C11 C12 H12 119.0 . . ?
C13 C12 H12 119.0 . . ?
C14 C13 C12 114.2(19) . . ?
C14 C13 H13 122.9 . . ?
C12 C13 H13 122.9 . . ?
C13 C14 C15 128.1(19) . . ?
C13 C14 H14 116.0 . . ?
C15 C14 H14 116.0 . . ?
C14 C15 C16 111.6(17) . . ?
C14 C15 H15 124.2 . . ?
C16 C15 H15 124.2 . . ?
C11 C16 C15 124.1(18) . . ?
C11 C16 H16 117.9 . . ?
C15 C16 H16 118.0 . . ?
C22 C21 C26 122.8(15) . . ?
C22 C21 P11 117.3(13) . . ?
C26 C21 P11 119.1(13) . . ?
C21 C22 C23 119.3(18) . . ?
C21 C22 H22 120.3 . . ?
C23 C22 H22 120.4 . . ?
C22 C23 C24 118(2) . . ?
C22 C23 H23 120.8 . . ?
C24 C23 H23 120.8 . . ?
C23 C24 C25 124(2) . . ?
C23 C24 H24 118.2 . . ?
C25 C24 H24 118.2 . . ?
C26 C25 C24 113.1(18) . . ?
C26 C25 H25 123.5 . . ?
C24 C25 H25 123.5 . . ?
C21 C26 C25 120.8(16) . . ?
C21 C26 H26 119.6 . . ?
C25 C26 H26 119.6 . . ?
C36 C31 C32 114.7(16) . . ?
C36 C31 P12 123.4(14) . . ?
C32 C31 P12 121.6(13) . . ?
C33 C32 C31 124.5(19) . . ?
C33 C32 H32 117.7 . . ?
C31 C32 H32 117.7 . . ?
C32 C33 C34 118(2) . . ?
C32 C33 H33 120.9 . . ?
C34 C33 H33 120.9 . . ?
C35 C34 C33 120(3) . . ?
C35 C34 H34 119.8 . . ?
C33 C34 H34 119.8 . . ?
C34 C35 C36 123(3) . . ?
C34 C35 H35 118.4 . . ?
C36 C35 H35 118.5 . . ?
C31 C36 C35 119(2) . . ?
C31 C36 H36 120.5 . . ?
C35 C36 H36 120.6 . . ?
C42 C41 C46 116.5(16) . . ?
C42 C41 P12 126.7(14) . . ?
C46 C41 P12 116.7(13) . . ?
C41 C42 C43 122.9(19) . . ?
C41 C42 H42 118.6 . . ?
C43 C42 H42 118.5 . . ?
C44 C43 C42 121(2) . . ?
C44 C43 H43 119.7 . . ?
C42 C43 H43 119.6 . . ?
C43 C44 C45 121(2) . . ?
C43 C44 H44 119.4 . . ?
C45 C44 H44 119.5 . . ?
C46 C45 C44 117(2) . . ?
C46 C45 H45 121.6 . . ?
C44 C45 H45 121.6 . . ?
C45 C46 C41 121.5(18) . . ?
C45 C46 H46 119.2 . . ?
C41 C46 H46 119.3 . . ?
C56 C51 C52 114.9(16) . . ?
C56 C51 P21 125.4(14) . . ?
C52 C51 P21 119.1(13) . . ?
C53 C52 C51 118(2) . . ?
C53 C52 H52 120.8 . . ?
C51 C52 H52 120.8 . . ?
C54 C53 C52 123(2) . . ?
C54 C53 H53 118.6 . . ?
C52 C53 H53 118.5 . . ?
C55 C54 C53 118(2) . . ?
C55 C54 H54 121.2 . . ?
C53 C54 H54 121.0 . . ?
C54 C55 C56 120(2) . . ?
C54 C55 H55 120.2 . . ?
C56 C55 H55 120.2 . . ?
C51 C56 C55 124(2) . . ?
C51 C56 H56 117.8 . . ?
C55 C56 H56 117.9 . . ?
C62 C61 C66 118.9(19) . . ?
C62 C61 P21 120.7(15) . . ?
C66 C61 P21 120.4(17) . . ?
C61 C62 C63 120.1(19) . . ?
C61 C62 H62 119.9 . . ?
C63 C62 H62 119.9 . . ?
C64 C63 C62 124(2) . . ?
C64 C63 H63 118.0 . . ?
C62 C63 H63 118.1 . . ?
C63 C64 C65 118(3) . . ?
C63 C64 H64 121.3 . . ?
C65 C64 H64 121.1 . . ?
C64 C65 C66 121(3) . . ?
C64 C65 H65 119.8 . . ?
C66 C65 H65 119.6 . . ?
C61 C66 C65 118(2) . . ?
C61 C66 H66 120.8 . . ?
C65 C66 H66 120.9 . . ?
C76 C71 C72 115.6(18) . . ?
C76 C71 P22 123.3(16) . . ?
C72 C71 P22 120.5(16) . . ?
C73 C72 C71 121(2) . . ?
C73 C72 H72 119.5 . . ?
C71 C72 H72 119.5 . . ?
C74 C73 C72 120(3) . . ?
C74 C73 H73 119.8 . . ?
C72 C73 H73 119.8 . . ?
C73 C74 C75 122(3) . . ?
C73 C74 H74 119.0 . . ?
C75 C74 H74 119.1 . . ?
C76 C75 C74 113(2) . . ?
C76 C75 H75 123.5 . . ?
C74 C75 H75 123.5 . . ?
C75 C76 C71 126(2) . . ?
C75 C76 H76 116.9 . . ?
C71 C76 H76 116.9 . . ?
C82 C81 C86 114.7(18) . . ?
C82 C81 P22 125.8(15) . . ?
C86 C81 P22 119.4(15) . . ?
C83 C82 C81 122(2) . . ?
C83 C82 H82 118.9 . . ?
C81 C82 H82 118.9 . . ?
C82 C83 C84 119(2) . . ?
C82 C83 H83 120.6 . . ?
C84 C83 H83 120.6 . . ?
C85 C84 C83 127(3) . . ?
C85 C84 H84 116.5 . . ?
C83 C84 H84 116.4 . . ?
C84 C85 C86 108(3) . . ?
C84 C85 H85 125.8 . . ?
C86 C85 H85 125.8 . . ?
C81 C86 C85 128(2) . . ?
C81 C86 H86 115.8 . . ?
C85 C86 H86 115.9 . . ?
C96 C91 C92 114.4(16) . . ?
C96 C91 P31 121.5(13) . . ?
C92 C91 P31 123.9(14) . . ?
C93 C92 C91 123(2) . . ?
C93 C92 H92 118.7 . . ?
C91 C92 H92 118.7 . . ?
C94 C93 C92 119(2) . . ?
C94 C93 H93 120.8 . . ?
C92 C93 H93 120.7 . . ?
C93 C94 C95 122(2) . . ?
C93 C94 H94 119.0 . . ?
C95 C94 H94 119.1 . . ?
C94 C95 C96 121(2) . . ?
C94 C95 H95 119.3 . . ?
C96 C95 H95 119.4 . . ?
C91 C96 C95 121(2) . . ?
C91 C96 H96 119.6 . . ?
C95 C96 H96 119.5 . . ?
C106 C101 C102 122.3(18) . . ?
C106 C101 P31 124.8(16) . . ?
C102 C101 P31 112.9(14) . . ?
C101 C102 C103 118.4(19) . . ?
C101 C102 H102 120.8 . . ?
C103 C102 H102 120.8 . . ?
C102 C103 C104 118(2) . . ?
C102 C103 H103 121.0 . . ?
C104 C103 H103 121.0 . . ?
C105 C104 C103 119(2) . . ?
C105 C104 H104 120.7 . . ?
C103 C104 H104 120.8 . . ?
C104 C105 C106 123(2) . . ?
C104 C105 H105 118.6 . . ?
C106 C105 H105 118.6 . . ?
C101 C106 C105 120(2) . . ?
C101 C106 H106 120.1 . . ?
C105 C106 H106 120.1 . . ?
C116 C111 C112 116.2(17) . . ?
C116 C111 P32 124.4(14) . . ?
C112 C111 P32 119.2(14) . . ?
C111 C112 C113 123(2) . . ?
C111 C112 H112 118.5 . . ?
C113 C112 H112 118.6 . . ?
C114 C113 C112 114(2) . . ?
C114 C113 H113 122.8 . . ?
C112 C113 H113 122.9 . . ?
C115 C114 C113 123(2) . . ?
C115 C114 H114 118.3 . . ?
C113 C114 H114 118.4 . . ?
C114 C115 C116 119(2) . . ?
C114 C115 H115 120.3 . . ?
C116 C115 H115 120.3 . . ?
C115 C116 C111 124(2) . . ?
C115 C116 H116 118.2 . . ?
C111 C116 H116 118.1 . . ?
C122 C121 C126 118.4(17) . . ?
C122 C121 P32 119.4(15) . . ?
C126 C121 P32 121.9(13) . . ?
C121 C122 C123 118.2(19) . . ?
C121 C122 H122 120.9 . . ?
C123 C122 H122 120.9 . . ?
C124 C123 C122 123.2(19) . . ?
C124 C123 H123 118.4 . . ?
C122 C123 H123 118.4 . . ?
C123 C124 C125 120(2) . . ?
C123 C124 H124 119.9 . . ?
C125 C124 H124 119.9 . . ?
C124 C125 C126 119(2) . . ?
C124 C125 H125 120.7 . . ?
C126 C125 H125 120.7 . . ?
C125 C126 C121 121(2) . . ?
C125 C126 H126 119.3 . . ?
C121 C126 H126 119.4 . . ?
N131 C132 C133 107.6(19) . . ?
N131 C132 S1 127.2(18) . . ?
C133 C132 S1 124.9(19) . . ?
C132 C133 C134 120(3) . . ?
C132 C133 H133 120.1 . . ?
C134 C133 H133 120.1 . . ?
C135 C134 C133 118(4) . . ?
C135 C134 H134 121.1 . . ?
C133 C134 H134 121.2 . . ?
C134 C135 C136 126(6) . . ?
C134 C135 H135 116.8 . . ?
C136 C135 H135 117.0 . . ?
C135 C136 N131 113(4) . . ?
C135 C136 H136 123.6 . . ?
N131 C136 H136 123.9 . . ?

loop_
_geom_torsion_atom_site_label_1
_geom_torsion_atom_site_label_2
_geom_torsion_atom_site_label_3
_geom_torsion_atom_site_label_4
_geom_torsion
_geom_torsion_site_symmetry_1
_geom_torsion_site_symmetry_2
_geom_torsion_site_symmetry_3
_geom_torsion_site_symmetry_4
_geom_torsion_publ_flag
P11 Cu1 Cu2 P12 -6.46(17) . . . . ?
P21 Cu1 Cu2 P12 177.37(19) . . . . ?
I1 Cu1 Cu2 P12 99.67(13) . . . . ?
I2 Cu1 Cu2 P12 -103.52(13) . . . . ?
Cu3 Cu1 Cu2 P12 165.01(12) . . . . ?
P11 Cu1 Cu2 P31 172.4(2) . . . . ?
P21 Cu1 Cu2 P31 -3.8(3) . . . . ?
I1 Cu1 Cu2 P31 -81.49(18) . . . . ?
I2 Cu1 Cu2 P31 75.33(18) . . . . ?
Cu3 Cu1 Cu2 P31 -16.15(17) . . . . ?
P11 Cu1 Cu2 I2 97.06(12) . . . . ?
P21 Cu1 Cu2 I2 -79.11(16) . . . . ?
I1 Cu1 Cu2 I2 -156.82(8) . . . . ?
Cu3 Cu1 Cu2 I2 -91.48(5) . . . . ?
P11 Cu1 Cu2 I1 -106.13(13) . . . . ?
P21 Cu1 Cu2 I1 77.70(16) . . . . ?
I2 Cu1 Cu2 I1 156.82(8) . . . . ?
Cu3 Cu1 Cu2 I1 65.34(5) . . . . ?
P11 Cu1 Cu2 Cu3 -171.47(12) . . . . ?
P21 Cu1 Cu2 Cu3 12.36(16) . . . . ?
I1 Cu1 Cu2 Cu3 -65.34(5) . . . . ?
I2 Cu1 Cu2 Cu3 91.48(5) . . . . ?
P12 Cu2 Cu3 P32 76.2(5) . . . . ?
P31 Cu2 Cu3 P32 -37.73(18) . . . . ?
I2 Cu2 Cu3 P32 -150.44(15) . . . . ?
I1 Cu2 Cu3 P32 99.04(15) . . . . ?
Cu1 Cu2 Cu3 P32 154.55(15) . . . . ?
P12 Cu2 Cu3 P22 -141.6(5) . . . . ?
P31 Cu2 Cu3 P22 104.47(18) . . . . ?
I2 Cu2 Cu3 P22 -8.23(14) . . . . ?
I1 Cu2 Cu3 P22 -118.75(14) . . . . ?
Cu1 Cu2 Cu3 P22 -63.24(14) . . . . ?
P12 Cu2 Cu3 S1 -34.2(5) . . . . ?
P31 Cu2 Cu3 S1 -148.11(18) . . . . ?
I2 Cu2 Cu3 S1 99.18(14) . . . . ?
I1 Cu2 Cu3 S1 -11.33(13) . . . . ?
Cu1 Cu2 Cu3 S1 44.18(14) . . . . ?
P12 Cu2 Cu3 I3 134.0(5) . . . . ?
P31 Cu2 Cu3 I3 20.1(3) . . . . ?
I2 Cu2 Cu3 I3 -92.6(3) . . . . ?
I1 Cu2 Cu3 I3 156.9(3) . . . . ?
Cu1 Cu2 Cu3 I3 -147.6(3) . . . . ?
P12 Cu2 Cu3 Cu1 -78.4(5) . . . . ?
P31 Cu2 Cu3 Cu1 167.71(14) . . . . ?
I2 Cu2 Cu3 Cu1 55.01(5) . . . . ?
I1 Cu2 Cu3 Cu1 -55.51(5) . . . . ?
P11 Cu1 Cu3 P32 44.5(8) . . . . ?
P21 Cu1 Cu3 P32 169.76(19) . . . . ?
I1 Cu1 Cu3 P32 35.09(13) . . . . ?
I2 Cu1 Cu3 P32 -76.36(14) . . . . ?
Cu2 Cu1 Cu3 P32 -22.16(13) . . . . ?
P11 Cu1 Cu3 P22 168.7(8) . . . . ?
P21 Cu1 Cu3 P22 -66.0(2) . . . . ?
I1 Cu1 Cu3 P22 159.30(15) . . . . ?
I2 Cu1 Cu3 P22 47.85(15) . . . . ?
Cu2 Cu1 Cu3 P22 102.06(15) . . . . ?
P11 Cu1 Cu3 S1 -65.4(8) . . . . ?
P21 Cu1 Cu3 S1 59.8(2) . . . . ?
I1 Cu1 Cu3 S1 -74.84(15) . . . . ?
I2 Cu1 Cu3 S1 173.70(15) . . . . ?
Cu2 Cu1 Cu3 S1 -132.09(15) . . . . ?
P11 Cu1 Cu3 I3 -147.4(8) . . . . ?
P21 Cu1 Cu3 I3 -22.1(3) . . . . ?
I1 Cu1 Cu3 I3 -156.8(3) . . . . ?
I2 Cu1 Cu3 I3 91.8(3) . . . . ?
Cu2 Cu1 Cu3 I3 146.0(3) . . . . ?
P11 Cu1 Cu3 Cu2 66.7(8) . . . . ?
P21 Cu1 Cu3 Cu2 -168.08(16) . . . . ?
I1 Cu1 Cu3 Cu2 57.25(5) . . . . ?
I2 Cu1 Cu3 Cu2 -54.21(5) . . . . ?
P11 Cu1 I1 Cu2 90.27(14) . . . . ?
P21 Cu1 I1 Cu2 -127.87(14) . . . . ?
I2 Cu1 I1 Cu2 -19.08(6) . . . . ?
Cu3 Cu1 I1 Cu2 -91.31(5) . . . . ?
P11 Cu1 I1 I2 109.35(15) . . . . ?
P21 Cu1 I1 I2 -108.79(14) . . . . ?
Cu2 Cu1 I1 I2 19.08(6) . . . . ?
Cu3 Cu1 I1 I2 -72.23(6) . . . . ?
P12 Cu2 I1 Cu1 -92.24(13) . . . . ?
P31 Cu2 I1 Cu1 134.19(14) . . . . ?
I2 Cu2 I1 Cu1 19.37(6) . . . . ?
Cu3 Cu2 I1 Cu1 93.73(5) . . . . ?
P12 Cu2 I1 I2 -111.61(14) . . . . ?
P31 Cu2 I1 I2 114.82(15) . . . . ?
Cu1 Cu2 I1 I2 -19.37(6) . . . . ?
Cu3 Cu2 I1 I2 74.36(6) . . . . ?
P12 Cu2 I2 Cu1 90.26(13) . . . . ?
P31 Cu2 I2 Cu1 -136.83(14) . . . . ?
I1 Cu2 I2 Cu1 -19.12(6) . . . . ?
Cu3 Cu2 I2 Cu1 -78.35(5) . . . . ?
P12 Cu2 I2 I1 109.38(14) . . . . ?
P31 Cu2 I2 I1 -117.71(15) . . . . ?
Cu1 Cu2 I2 I1 19.12(6) . . . . ?
Cu3 Cu2 I2 I1 -59.23(5) . . . . ?
P11 Cu1 I2 Cu2 -95.32(13) . . . . ?
P21 Cu1 I2 Cu2 127.07(13) . . . . ?
I1 Cu1 I2 Cu2 19.26(6) . . . . ?
Cu3 Cu1 I2 Cu2 76.68(5) . . . . ?
P11 Cu1 I2 I1 -114.58(14) . . . . ?
P21 Cu1 I2 I1 107.81(14) . . . . ?
Cu2 Cu1 I2 I1 -19.26(6) . . . . ?
Cu3 Cu1 I2 I1 57.42(6) . . . . ?
Cu1 I1 I2 Cu2 -149.16(10) . . . . ?
Cu2 I1 I2 Cu1 149.16(10) . . . . ?
P32 Cu3 S1 C132 71.8(7) . . . . ?
P22 Cu3 S1 C132 -162.7(7) . . . . ?
I3 Cu3 S1 C132 -44.9(7) . . . . ?
Cu2 Cu3 S1 C132 131.5(7) . . . . ?
Cu1 Cu3 S1 C132 152.3(7) . . . . ?
P21 Cu1 P11 C1 161.1(5) . . . . ?
I1 Cu1 P11 C1 -70.9(6) . . . . ?
I2 Cu1 P11 C1 39.8(6) . . . . ?
Cu2 Cu1 P11 C1 -15.0(6) . . . . ?
Cu3 Cu1 P11 C1 -79.6(10) . . . . ?
P21 Cu1 P11 C11 -79.1(6) . . . . ?
I1 Cu1 P11 C11 48.9(5) . . . . ?
I2 Cu1 P11 C11 159.6(5) . . . . ?
Cu2 Cu1 P11 C11 104.8(5) . . . . ?
Cu3 Cu1 P11 C11 40.2(10) . . . . ?
P21 Cu1 P11 C21 46.3(7) . . . . ?
I1 Cu1 P11 C21 174.4(7) . . . . ?
I2 Cu1 P11 C21 -75.0(7) . . . . ?
Cu2 Cu1 P11 C21 -129.7(7) . . . . ?
Cu3 Cu1 P11 C21 165.6(9) . . . . ?
P31 Cu2 P12 C31 53.4(7) . . . . ?
I2 Cu2 P12 C31 176.8(6) . . . . ?
I1 Cu2 P12 C31 -72.9(6) . . . . ?
Cu1 Cu2 P12 C31 -127.5(6) . . . . ?
Cu3 Cu2 P12 C31 -52.1(8) . . . . ?
P31 Cu2 P12 C2 168.6(6) . . . . ?
I2 Cu2 P12 C2 -68.1(6) . . . . ?
I1 Cu2 P12 C2 42.3(6) . . . . ?
Cu1 Cu2 P12 C2 -12.4(6) . . . . ?
Cu3 Cu2 P12 C2 63.0(8) . . . . ?
P31 Cu2 P12 C41 -73.6(6) . . . . ?
I2 Cu2 P12 C41 49.8(6) . . . . ?
I1 Cu2 P12 C41 160.1(6) . . . . ?
Cu1 Cu2 P12 C41 105.5(6) . . . . ?
Cu3 Cu2 P12 C41 -179.1(6) . . . . ?
P11 Cu1 P21 C61 -60.9(7) . . . . ?
I1 Cu1 P21 C61 168.6(7) . . . . ?
I2 Cu1 P21 C61 59.6(7) . . . . ?
Cu2 Cu1 P21 C61 114.2(7) . . . . ?
Cu3 Cu1 P21 C61 128.8(7) . . . . ?
P11 Cu1 P21 C51 59.5(6) . . . . ?
I1 Cu1 P21 C51 -71.0(6) . . . . ?
I2 Cu1 P21 C51 -180.0(6) . . . . ?
Cu2 Cu1 P21 C51 -125.4(6) . . . . ?
Cu3 Cu1 P21 C51 -110.8(6) . . . . ?
P11 Cu1 P21 C3 175.9(6) . . . . ?
I1 Cu1 P21 C3 45.4(6) . . . . ?
I2 Cu1 P21 C3 -63.5(6) . . . . ?
Cu2 Cu1 P21 C3 -9.0(6) . . . . ?
Cu3 Cu1 P21 C3 5.7(5) . . . . ?
P32 Cu3 P22 C81 -49.9(6) . . . . ?
S1 Cu3 P22 C81 -169.8(6) . . . . ?
I3 Cu3 P22 C81 74.7(6) . . . . ?
Cu2 Cu3 P22 C81 -86.9(6) . . . . ?
Cu1 Cu3 P22 C81 -117.5(6) . . . . ?
P32 Cu3 P22 C71 -171.5(6) . . . . ?
S1 Cu3 P22 C71 68.6(7) . . . . ?
I3 Cu3 P22 C71 -46.9(7) . . . . ?
Cu2 Cu3 P22 C71 151.6(7) . . . . ?
Cu1 Cu3 P22 C71 120.9(7) . . . . ?
P32 Cu3 P22 C4 72.3(6) . . . . ?
S1 Cu3 P22 C4 -47.6(6) . . . . ?
I3 Cu3 P22 C4 -163.1(6) . . . . ?
Cu2 Cu3 P22 C4 35.4(6) . . . . ?
Cu1 Cu3 P22 C4 4.8(6) . . . . ?
P12 Cu2 P31 C5 -168.0(6) . . . . ?
I2 Cu2 P31 C5 68.7(6) . . . . ?
I1 Cu2 P31 C5 -45.0(6) . . . . ?
Cu1 Cu2 P31 C5 13.3(7) . . . . ?
Cu3 Cu2 P31 C5 -4.5(6) . . . . ?
P12 Cu2 P31 C91 70.6(6) . . . . ?
I2 Cu2 P31 C91 -52.7(6) . . . . ?
I1 Cu2 P31 C91 -166.4(6) . . . . ?
Cu1 Cu2 P31 C91 -108.0(6) . . . . ?
Cu3 Cu2 P31 C91 -125.9(6) . . . . ?
P12 Cu2 P31 C101 -43.6(6) . . . . ?
I2 Cu2 P31 C101 -166.9(6) . . . . ?
I1 Cu2 P31 C101 79.4(6) . . . . ?
Cu1 Cu2 P31 C101 137.8(6) . . . . ?
Cu3 Cu2 P31 C101 120.0(6) . . . . ?
P22 Cu3 P32 C111 88.8(6) . . . . ?
S1 Cu3 P32 C111 -152.3(6) . . . . ?
I3 Cu3 P32 C111 -36.7(6) . . . . ?
Cu2 Cu3 P32 C111 127.9(6) . . . . ?
Cu1 Cu3 P32 C111 139.8(6) . . . . ?
P22 Cu3 P32 C6 -39.0(6) . . . . ?
S1 Cu3 P32 C6 80.0(6) . . . . ?
I3 Cu3 P32 C6 -164.4(6) . . . . ?
Cu2 Cu3 P32 C6 0.1(5) . . . . ?
Cu1 Cu3 P32 C6 12.0(6) . . . . ?
P22 Cu3 P32 C121 -153.9(6) . . . . ?
S1 Cu3 P32 C121 -35.0(7) . . . . ?
I3 Cu3 P32 C121 80.6(6) . . . . ?
Cu2 Cu3 P32 C121 -114.8(6) . . . . ?
Cu1 Cu3 P32 C121 -103.0(6) . . . . ?
C11 P11 C1 C2 -59.9(12) . . . . ?
C21 P11 C1 C2 -165.3(11) . . . . ?
Cu1 P11 C1 C2 69.6(12) . . . . ?
P11 C1 C2 P12 -109.1(11) . . . . ?
C31 P12 C2 C1 -171.9(10) . . . . ?
C41 P12 C2 C1 -64.6(12) . . . . ?
Cu2 P12 C2 C1 65.3(11) . . . . ?
C61 P21 C3 C4 -64.7(13) . . . . ?
C51 P21 C3 C4 -169.7(11) . . . . ?
Cu1 P21 C3 C4 63.9(11) . . . . ?
P21 C3 C4 P22 169.6(7) . . . . ?
C81 P22 C4 C3 175.7(11) . . . . ?
C71 P22 C4 C3 -76.8(12) . . . . ?
Cu3 P22 C4 C3 48.0(12) . . . . ?
C91 P31 C5 C6 -162.2(11) . . . . ?
C101 P31 C5 C6 -60.2(12) . . . . ?
Cu2 P31 C5 C6 74.3(11) . . . . ?
P31 C5 C6 P32 175.6(8) . . . . ?
C111 P32 C6 C5 -65.0(13) . . . . ?
C121 P32 C6 C5 -168.4(12) . . . . ?
Cu3 P32 C6 C5 71.8(12) . . . . ?
C1 P11 C11 C16 137.6(12) . . . . ?
C21 P11 C11 C16 -119.0(13) . . . . ?
Cu1 P11 C11 C16 13.3(14) . . . . ?
C1 P11 C11 C12 -40.5(14) . . . . ?
C21 P11 C11 C12 63.0(14) . . . . ?
Cu1 P11 C11 C12 -164.8(11) . . . . ?
C16 C11 C12 C13 -6(3) . . . . ?
P11 C11 C12 C13 172.5(14) . . . . ?
C11 C12 C13 C14 8(3) . . . . ?
C12 C13 C14 C15 -6(3) . . . . ?
C13 C14 C15 C16 2(3) . . . . ?
C12 C11 C16 C15 1(3) . . . . ?
P11 C11 C16 C15 -177.2(13) . . . . ?
C14 C15 C16 C11 1(2) . . . . ?
C1 P11 C21 C22 -56.2(16) . . . . ?
C11 P11 C21 C22 -161.6(15) . . . . ?
Cu1 P11 C21 C22 64.9(16) . . . . ?
C1 P11 C21 C26 133.8(14) . . . . ?
C11 P11 C21 C26 28.3(15) . . . . ?
Cu1 P11 C21 C26 -105.2(13) . . . . ?
C26 C21 C22 C23 -11(3) . . . . ?
P11 C21 C22 C23 179.7(18) . . . . ?
C21 C22 C23 C24 14(4) . . . . ?
C22 C23 C24 C25 -16(4) . . . . ?
C23 C24 C25 C26 13(4) . . . . ?
C22 C21 C26 C25 8(3) . . . . ?
P11 C21 C26 C25 177.7(15) . . . . ?
C24 C25 C26 C21 -8(3) . . . . ?
C2 P12 C31 C36 131.4(15) . . . . ?
C41 P12 C31 C36 28.7(16) . . . . ?
Cu2 P12 C31 C36 -106.3(14) . . . . ?
C2 P12 C31 C32 -54.8(14) . . . . ?
C41 P12 C31 C32 -157.6(13) . . . . ?
Cu2 P12 C31 C32 67.4(14) . . . . ?
C36 C31 C32 C33 -3(3) . . . . ?
P12 C31 C32 C33 -176.9(17) . . . . ?
C31 C32 C33 C34 4(3) . . . . ?
C32 C33 C34 C35 -1(4) . . . . ?
C33 C34 C35 C36 -3(4) . . . . ?
C32 C31 C36 C35 -1(3) . . . . ?
P12 C31 C36 C35 172.9(16) . . . . ?
C34 C35 C36 C31 4(4) . . . . ?
C31 P12 C41 C42 51.2(17) . . . . ?
C2 P12 C41 C42 -52.9(17) . . . . ?
Cu2 P12 C41 C42 -177.7(13) . . . . ?
C31 P12 C41 C46 -123.9(13) . . . . ?
C2 P12 C41 C46 132.0(13) . . . . ?
Cu2 P12 C41 C46 7.2(15) . . . . ?
C46 C41 C42 C43 -5(3) . . . . ?
P12 C41 C42 C43 -179.9(15) . . . . ?
C41 C42 C43 C44 0(3) . . . . ?
C42 C43 C44 C45 7(4) . . . . ?
C43 C44 C45 C46 -7(4) . . . . ?
C44 C45 C46 C41 2(3) . . . . ?
C42 C41 C46 C45 4(3) . . . . ?
P12 C41 C46 C45 179.6(15) . . . . ?
C61 P21 C51 C56 -137(2) . . . . ?
C3 P21 C51 C56 -29(2) . . . . ?
Cu1 P21 C51 C56 95(2) . . . . ?
C61 P21 C51 C52 51.1(17) . . . . ?
C3 P21 C51 C52 159.5(15) . . . . ?
Cu1 P21 C51 C52 -76.6(16) . . . . ?
C56 C51 C52 C53 2(3) . . . . ?
P21 C51 C52 C53 175(2) . . . . ?
C51 C52 C53 C54 11(5) . . . . ?
C52 C53 C54 C55 -16(5) . . . . ?
C53 C54 C55 C56 7(4) . . . . ?
C52 C51 C56 C55 -10(4) . . . . ?
P21 C51 C56 C55 178(2) . . . . ?
C54 C55 C56 C51 6(4) . . . . ?
C51 P21 C61 C62 -115.5(17) . . . . ?
C3 P21 C61 C62 140.7(16) . . . . ?
Cu1 P21 C61 C62 13.3(18) . . . . ?
C51 P21 C61 C66 64(2) . . . . ?
C3 P21 C61 C66 -39(2) . . . . ?
Cu1 P21 C61 C66 -166.9(18) . . . . ?
C66 C61 C62 C63 -4(3) . . . . ?
P21 C61 C62 C63 175.5(17) . . . . ?
C61 C62 C63 C64 9(4) . . . . ?
C62 C63 C64 C65 -9(5) . . . . ?
C63 C64 C65 C66 6(6) . . . . ?
C62 C61 C66 C65 1(4) . . . . ?
P21 C61 C66 C65 -179(2) . . . . ?
C64 C65 C66 C61 -2(5) . . . . ?
C81 P22 C71 C76 -141.9(17) . . . . ?
C4 P22 C71 C76 110.8(18) . . . . ?
Cu3 P22 C71 C76 -14.8(19) . . . . ?
C81 P22 C71 C72 47.5(18) . . . . ?
C4 P22 C71 C72 -59.7(18) . . . . ?
Cu3 P22 C71 C72 174.6(15) . . . . ?
C76 C71 C72 C73 6(3) . . . . ?
P22 C71 C72 C73 177(2) . . . . ?
C71 C72 C73 C74 1(5) . . . . ?
C72 C73 C74 C75 -13(6) . . . . ?
C73 C74 C75 C76 17(5) . . . . ?
C74 C75 C76 C71 -9(4) . . . . ?
C72 C71 C76 C75 -2(4) . . . . ?
P22 C71 C76 C75 -173(2) . . . . ?
C71 P22 C81 C82 -85.8(18) . . . . ?
C4 P22 C81 C82 17.9(18) . . . . ?
Cu3 P22 C81 C82 146.7(15) . . . . ?
C71 P22 C81 C86 96.9(17) . . . . ?
C4 P22 C81 C86 -159.4(16) . . . . ?
Cu3 P22 C81 C86 -30.6(17) . . . . ?
C86 C81 C82 C83 -3(3) . . . . ?
P22 C81 C82 C83 180.0(18) . . . . ?
C81 C82 C83 C84 7(4) . . . . ?
C82 C83 C84 C85 -4(4) . . . . ?
C83 C84 C85 C86 -2(4) . . . . ?
C82 C81 C86 C85 -5(3) . . . . ?
P22 C81 C86 C85 173(2) . . . . ?
C84 C85 C86 C81 7(4) . . . . ?
C5 P31 C91 C96 163.1(14) . . . . ?
C101 P31 C91 C96 59.0(15) . . . . ?
Cu2 P31 C91 C96 -69.5(15) . . . . ?
C5 P31 C91 C92 -22.7(15) . . . . ?
C101 P31 C91 C92 -126.8(14) . . . . ?
Cu2 P31 C91 C92 104.7(13) . . . . ?
C96 C91 C92 C93 6(3) . . . . ?
P31 C91 C92 C93 -169.1(14) . . . . ?
C91 C92 C93 C94 -7(3) . . . . ?
C92 C93 C94 C95 4(3) . . . . ?
C93 C94 C95 C96 0(4) . . . . ?
C92 C91 C96 C95 -2(3) . . . . ?
P31 C91 C96 C95 172.9(15) . . . . ?
C94 C95 C96 C91 -1(3) . . . . ?
C5 P31 C101 C106 -61.0(17) . . . . ?
C91 P31 C101 C106 47.4(17) . . . . ?
Cu2 P31 C101 C106 167.6(14) . . . . ?
C5 P31 C101 C102 118.7(13) . . . . ?
C91 P31 C101 C102 -132.9(12) . . . . ?
Cu2 P31 C101 C102 -12.7(14) . . . . ?
C106 C101 C102 C103 1(3) . . . . ?
P31 C101 C102 C103 -178.4(14) . . . . ?
C101 C102 C103 C104 -3(3) . . . . ?
C102 C103 C104 C105 1(4) . . . . ?
C103 C104 C105 C106 3(4) . . . . ?
C102 C101 C106 C105 2(3) . . . . ?
P31 C101 C106 C105 -178.2(15) . . . . ?
C104 C105 C106 C101 -4(4) . . . . ?
C6 P32 C111 C116 -44.2(17) . . . . ?
C121 P32 C111 C116 60.1(16) . . . . ?
Cu3 P32 C111 C116 -177.8(13) . . . . ?
C6 P32 C111 C112 131.0(15) . . . . ?
C121 P32 C111 C112 -124.7(15) . . . . ?
Cu3 P32 C111 C112 -2.6(17) . . . . ?
C116 C111 C112 C113 -3(3) . . . . ?
P32 C111 C112 C113 -178.9(19) . . . . ?
C111 C112 C113 C114 1(4) . . . . ?
C112 C113 C114 C115 1(4) . . . . ?
C113 C114 C115 C116 0(4) . . . . ?
C114 C115 C116 C111 -3(3) . . . . ?
C112 C111 C116 C115 5(3) . . . . ?
P32 C111 C116 C115 180.0(16) . . . . ?
C111 P32 C121 C122 36.3(15) . . . . ?
C6 P32 C121 C122 141.6(14) . . . . ?
Cu3 P32 C121 C122 -94.1(14) . . . . ?
C111 P32 C121 C126 -150.9(14) . . . . ?
C6 P32 C121 C126 -45.5(16) . . . . ?
Cu3 P32 C121 C126 78.8(15) . . . . ?
C126 C121 C122 C123 -1(3) . . . . ?
P32 C121 C122 C123 172.3(13) . . . . ?
C121 C122 C123 C124 2(3) . . . . ?
C122 C123 C124 C125 -2(3) . . . . ?
C123 C124 C125 C126 0(3) . . . . ?
C124 C125 C126 C121 1(3) . . . . ?
C122 C121 C126 C125 -1(3) . . . . ?
P32 C121 C126 C125 -173.5(15) . . . . ?
C136 N131 C132 C133 -5(3) . . . . ?
C136 N131 C132 S1 -179(2) . . . . ?
Cu3 S1 C132 N131 5(2) . . . . ?
Cu3 S1 C132 C133 -168.1(17) . . . . ?
N131 C132 C133 C134 5(3) . . . . ?
S1 C132 C133 C134 179(2) . . . . ?
C132 C133 C134 C135 -15(7) . . . . ?
C133 C134 C135 C136 26(9) . . . . ?
C134 C135 C136 N131 -24(8) . . . . ?
C132 N131 C136 C135 13(5) . . . . ?

loop_
_geom_hbond_atom_site_label_D
_geom_hbond_atom_site_label_H
_geom_hbond_atom_site_label_A
_geom_hbond_distance_DH
_geom_hbond_distance_HA
_geom_hbond_distance_DA
_geom_hbond_angle_DHA
_geom_hbond_site_symmetry_A
N131 H131 I3  0.86 2.96 3.72(2) 148.8 .

_diffrn_measured_fraction_theta_max    0.991
_diffrn_reflns_theta_full              26.49
_diffrn_measured_fraction_theta_full   0.991
_refine_diff_density_max    1.546
_refine_diff_density_min   -0.805
_refine_diff_density_rms    0.284
#==============================================================================

#_eof # End of Crystallographic Information File


#Plain Text Attachment [ Save to my Yahoo! Briefcase  |  Download File ]
data_01il01
_database_code_CSD                  208445

_audit_creation_method           SHELXL-97
_chemical_name_systematic
;
?
;
_chemical_name_common            ?
_chemical_melting_point          ?
_chemical_formula_moiety         ?
_chemical_formula_sum            'C17 H18 Cu3 I3 N4 S3'
_chemical_formula_weight         945.85

loop_
_atom_type_symbol
_atom_type_description
_atom_type_scat_dispersion_real
_atom_type_scat_dispersion_imag
_atom_type_scat_source
Cu Cu 0.3201 1.2651 'International Tables Vol C Tables 4.2.6.8 and 6.1.1.4'
I I -0.4742 1.8119 'International Tables Vol C Tables 4.2.6.8 and 6.1.1.4'
S S 0.1246 0.1234 'International Tables Vol C Tables 4.2.6.8 and 6.1.1.4'
N N 0.0061 0.0033 'International Tables Vol C Tables 4.2.6.8 and 6.1.1.4'
C C 0.0033 0.0016 'International Tables Vol C Tables 4.2.6.8 and 6.1.1.4'
H H 0.0000 0.0000 'International Tables Vol C Tables 4.2.6.8 and 6.1.1.4'

_symmetry_cell_setting           Triclinic
_symmetry_space_group_name_H-M   P-1
_symmetry_Int_Tables_number      2


loop_
_symmetry_equiv_pos_as_xyz
'x, y, z'
'-x, -y, -z'

_cell_length_a                   8.0465(16)
_cell_length_b                   13.454(3)
_cell_length_c                   13.770(3)
_cell_angle_alpha                64.097(3)
_cell_angle_beta                 79.996(4)
_cell_angle_gamma                81.448(4)
_cell_volume                     1316.1(5)
_cell_formula_units_Z            2
_cell_measurement_temperature    293(2)
_cell_measurement_reflns_used    915
_cell_measurement_theta_min      2.86
_cell_measurement_theta_max      26.32

_exptl_crystal_description       needle
_exptl_crystal_colour            orange
_exptl_crystal_size_max          0.50
_exptl_crystal_size_mid          0.06
_exptl_crystal_size_min          0.06
_exptl_crystal_density_meas      ?
_exptl_crystal_density_diffrn    2.387
_exptl_crystal_density_method    'not measured'
_exptl_crystal_F_000             884
_exptl_absorpt_coefficient_mu    6.172
_exptl_absorpt_correction_type   SADABS
_exptl_absorpt_correction_T_min  0.1484
_exptl_absorpt_correction_T_max  0.7084
_exptl_absorpt_process_details   ?

_exptl_special_details
;
?
;

_diffrn_ambient_temperature      293(2)
_diffrn_radiation_wavelength     0.71073
_diffrn_radiation_type           MoK\a
_diffrn_radiation_source         'fine-focus sealed tube'
_diffrn_radiation_monochromator  graphite
_diffrn_measurement_device_type  ' Bruker SMART CDD-1000'
_diffrn_measurement_method       '  omega scans'
_diffrn_detector_area_resol_mean ?
_diffrn_standards_number         ?
_diffrn_standards_interval_count ?
_diffrn_standards_interval_time  ?
_diffrn_standards_decay_%        0
_diffrn_reflns_number            13160
_diffrn_reflns_av_R_equivalents  0.0459
_diffrn_reflns_av_sigmaI/netI    0.0480
_diffrn_reflns_limit_h_min       -6
_diffrn_reflns_limit_h_max       10
_diffrn_reflns_limit_k_min       -16
_diffrn_reflns_limit_k_max       15
_diffrn_reflns_limit_l_min       -17
_diffrn_reflns_limit_l_max       17
_diffrn_reflns_theta_min         1.66
_diffrn_reflns_theta_max         26.37
_reflns_number_total             5354
_reflns_number_gt                3967
_reflns_threshold_expression     >2sigma(I)

_computing_data_collection       'SMART-Software (Bruker, 1998)'
_computing_cell_refinement       'SMART-Software (Bruker, 1998)'
_computing_data_reduction        'SAINT-Software (Bruker, 1998)'
_computing_structure_solution    'SHELXS-97 (Sheldrick, 1990)'
_computing_structure_refinement  'SHELXL-97 (Sheldrick, 1997)'
_computing_molecular_graphics    'PLATON (Spek, 2002)'
_computing_publication_material  'SHELXL-97 (Sheldrick, 1997)'

_refine_special_details
;
Refinement of F^2^ against ALL reflections.  The weighted R-factor wR
and
goodness of fit S are based on F^2^, conventional R-factors R are based
on F, with F set to zero for negative F^2^. The threshold expression of
F^2^ > 2sigma(F^2^) is used only for calculating R-factors(gt) etc. and
is
not relevant to the choice of reflections for refinement.  R-factors
based
on F^2^ are statistically about twice as large as those based on F, and
R-
factors based on ALL data will be even larger.
;

_refine_ls_structure_factor_coef Fsqd
_refine_ls_matrix_type           full
_refine_ls_weighting_scheme      calc
_refine_ls_weighting_details
'calc w=1/[\s^2^(Fo^2^)+(0.0478P)^2^+0.0000P] where P=(Fo^2^+2Fc^2^)/3'
_atom_sites_solution_primary     direct
_atom_sites_solution_secondary   difmap
_atom_sites_solution_hydrogens   geom
_refine_ls_hydrogen_treatment    noref
_refine_ls_extinction_method     none
_refine_ls_extinction_coef       ?
_refine_ls_number_reflns         5354
_refine_ls_number_parameters     271
_refine_ls_number_restraints     0
_refine_ls_R_factor_all          0.0513
_refine_ls_R_factor_gt           0.0342
_refine_ls_wR_factor_ref         0.0904
_refine_ls_wR_factor_gt          0.0828
_refine_ls_goodness_of_fit_ref   0.962
_refine_ls_restrained_S_all      0.962
_refine_ls_shift/su_max          0.000
_refine_ls_shift/su_mean         0.000

loop_
_atom_site_label
_atom_site_type_symbol
_atom_site_fract_x
_atom_site_fract_y
_atom_site_fract_z
_atom_site_U_iso_or_equiv
_atom_site_adp_type
_atom_site_occupancy
_atom_site_symmetry_multiplicity
_atom_site_calc_flag
_atom_site_refinement_flags
_atom_site_disorder_assembly
_atom_site_disorder_group
Cu1 Cu 0.46039(10) 0.09369(6) 0.62380(6) 0.0468(2) Uani 1 1 d . . .
Cu2 Cu 0.20196(10) 0.10617(6) 0.48239(6) 0.0470(2) Uani 1 1 d . . .
Cu3 Cu 0.70142(10) 0.21425(6) 0.33241(6) 0.0462(2) Uani 1 1 d . . .
I1 I 0.36792(5) 0.15989(3) 0.77743(3) 0.04597(12) Uani 1 1 d . . .
I2 I 0.73381(6) 0.38413(3) 0.14733(3) 0.05737(14) Uani 1 1 d . . .
I3 I 0.93627(5) 0.24540(3) 0.45345(3) 0.03858(11) Uani 1 1 d . . .
S1 S 0.45392(16) 0.21967(10) 0.44482(10) 0.0302(3) Uani 1 1 d . . .
S2 S 0.23469(17) -0.03736(10) 0.65066(10) 0.0315(3) Uani 1 1 d . . .
S3 S 0.69465(17) -0.03080(10) 0.63928(10) 0.0317(3) Uani 1 1 d . . .
N11 N 0.4919(6) 0.4346(4) 0.3601(4) 0.0426(12) Uani 1 1 d . . .
H11A H 0.5736 0.4081 0.3235 0.051 Uiso 1 1 d R . .
N21 N -0.0290(6) 0.0601(4) 0.7310(4) 0.0369(11) Uani 1 1 d . . .
H21A H -0.0036 0.1100 0.6577 0.044 Uiso 1 1 d R . .
N31 N 0.5516(6) -0.1215(4) 0.8448(4) 0.0460(12) Uani 1 1 d . . .
H31A H 0.4820 -0.0632 0.8264 0.055 Uiso 1 1 d R . .
C11 C 0.4035(7) 0.3522(4) 0.4369(4) 0.0328(12) Uani 1 1 d . . .
C12 C 0.2728(7) 0.3810(5) 0.5044(5) 0.0422(14) Uani 1 1 d . . .
H12 H 0.2067 0.3272 0.5582 0.051 Uiso 1 1 d R . .
C13 C 0.2430(8) 0.4894(5) 0.4899(6) 0.0515(16) Uani 1 1 d . . .
H13 H 0.1570 0.5091 0.5344 0.062 Uiso 1 1 d R . .
C14 C 0.3412(9) 0.5715(5) 0.4090(6) 0.0537(17) Uani 1 1 d . . .
H14 H 0.3218 0.6448 0.3997 0.064 Uiso 1 1 d R . .
C15 C 0.4625(9) 0.5415(5) 0.3459(5) 0.0552(17) Uani 1 1 d . . .
H15 H 0.5283 0.5948 0.2910 0.066 Uiso 1 1 d R . .
C21 C 0.0841(6) -0.0288(4) 0.7542(4) 0.0299(11) Uani 1 1 d . . .
C22 C 0.0751(8) -0.1065(5) 0.8621(4) 0.0427(14) Uani 1 1 d . . .
H22 H 0.1510 -0.1693 0.8822 0.051 Uiso 1 1 d R . .
C23 C -0.0436(9) -0.0905(6) 0.9394(5) 0.0534(17) Uani 1 1 d . . .
H23 H -0.0488 -0.1425 1.0115 0.064 Uiso 1 1 d R . .
C24 C -0.1581(8) 0.0031(6) 0.9094(5) 0.0531(17) Uani 1 1 d . . .
H24 H -0.2402 0.0147 0.9608 0.064 Uiso 1 1 d R . .
C25 C -0.1466(8) 0.0771(6) 0.8051(5) 0.0493(16) Uani 1 1 d . . .
H25 H -0.2218 0.1403 0.7842 0.059 Uiso 1 1 d R . .
C31 C 0.6708(7) -0.1362(4) 0.7692(4) 0.0321(11) Uani 1 1 d . . .
C32 C 0.7718(8) -0.2346(5) 0.8033(5) 0.0540(17) Uani 1 1 d . . .
H32 H 0.8538 -0.2498 0.7539 0.065 Uiso 1 1 d R . .
C33 C 0.7510(11) -0.3098(6) 0.9095(6) 0.077(2) Uani 1 1 d . . .
H33 H 0.8215 -0.3751 0.9328 0.093 Uiso 1 1 d R . .
C34 C 0.6264(11) -0.2905(6) 0.9845(6) 0.073(2) Uani 1 1 d . . .
H34 H 0.6112 -0.3423 1.0566 0.087 Uiso 1 1 d R . .
C35 C 0.5295(9) -0.1946(6) 0.9497(5) 0.0612(19) Uani 1 1 d . . .
H35 H 0.4461 -0.1785 0.9979 0.073 Uiso 1 1 d R . .
N1 N 0.2082(13) 0.7069(8) 0.1393(8) 0.113(3) Uani 1 1 d . . .
C1 C 0.1512(17) 0.6319(10) 0.1634(9) 0.114(4) Uani 1 1 d . . .
C2 C 0.092(4) 0.5290(17) 0.1942(14) 0.37(2) Uani 1 1 d . . .
H2A H 0.1749 0.4699 0.2276 0.562 Uiso 1 1 d R . .
H2B H 0.0637 0.5241 0.1315 0.562 Uiso 1 1 d R . .
H2C H -0.0083 0.5232 0.2452 0.562 Uiso 1 1 d R . .

loop_
_atom_site_aniso_label
_atom_site_aniso_U_11
_atom_site_aniso_U_22
_atom_site_aniso_U_33
_atom_site_aniso_U_23
_atom_site_aniso_U_13
_atom_site_aniso_U_12
Cu1 0.0616(5) 0.0360(4) 0.0359(4) -0.0149(3) 0.0008(3) 0.0079(3)
Cu2 0.0542(5) 0.0445(4) 0.0346(4) -0.0171(3) 0.0005(3) 0.0129(3)
Cu3 0.0562(5) 0.0274(4) 0.0421(4) -0.0112(3) 0.0137(3) 0.0000(3)
I1 0.0572(3) 0.0429(2) 0.0423(2) -0.02606(19) 0.00709(18) -0.00670(18)
I2 0.0796(3) 0.0370(2) 0.0375(2) -0.00458(18) 0.0053(2) -0.0019(2)
I3 0.0349(2) 0.0366(2) 0.0446(2) -0.01912(17) -0.00535(16) 0.00313(15)
S1 0.0313(7) 0.0250(6) 0.0330(7) -0.0136(6) 0.0047(5) -0.0042(5)
S2 0.0355(7) 0.0256(6) 0.0298(6) -0.0122(6) 0.0067(5) -0.0025(5)
S3 0.0390(8) 0.0255(6) 0.0275(6) -0.0109(6) 0.0023(5) -0.0022(5)
N11 0.052(3) 0.023(2) 0.046(3) -0.012(2) 0.005(2) -0.006(2)
N21 0.034(3) 0.041(3) 0.034(2) -0.017(2) 0.002(2) -0.002(2)
N31 0.055(3) 0.038(3) 0.035(3) -0.012(2) 0.005(2) 0.004(2)
C11 0.035(3) 0.029(3) 0.036(3) -0.017(2) -0.006(2) 0.002(2)
C12 0.039(3) 0.043(3) 0.050(4) -0.029(3) -0.004(3) 0.003(3)
C13 0.046(4) 0.050(4) 0.068(4) -0.040(4) -0.007(3) 0.013(3)
C14 0.070(5) 0.032(3) 0.065(4) -0.029(3) -0.011(4) 0.007(3)
C15 0.082(5) 0.027(3) 0.051(4) -0.013(3) -0.002(3) -0.009(3)
C21 0.030(3) 0.030(3) 0.035(3) -0.019(2) 0.002(2) -0.006(2)
C22 0.047(4) 0.039(3) 0.035(3) -0.015(3) 0.008(3) -0.001(3)
C23 0.067(5) 0.054(4) 0.035(3) -0.018(3) 0.012(3) -0.016(3)
C24 0.049(4) 0.072(5) 0.045(4) -0.037(4) 0.008(3) -0.002(3)
C25 0.039(4) 0.061(4) 0.049(4) -0.031(3) 0.002(3) 0.007(3)
C31 0.037(3) 0.031(3) 0.027(3) -0.013(2) 0.000(2) -0.003(2)
C32 0.055(4) 0.045(4) 0.042(3) -0.009(3) 0.000(3) 0.017(3)
C33 0.090(6) 0.047(4) 0.057(4) 0.002(4) -0.003(4) 0.026(4)
C34 0.096(6) 0.059(5) 0.033(4) 0.001(3) 0.005(4) 0.002(4)
C35 0.069(5) 0.066(5) 0.036(3) -0.017(3) 0.009(3) 0.003(4)
N1 0.139(8) 0.094(7) 0.105(7) -0.040(6) -0.004(6) -0.026(6)
C1 0.180(12) 0.088(8) 0.073(7) -0.012(6) -0.036(7) -0.051(8)
C2 0.76(6) 0.26(2) 0.138(15) -0.009(14) -0.08(2) -0.37(3)

_geom_special_details
;
All esds (except the esd in the dihedral angle between two l.s. planes)
are estimated using the full covariance matrix.  The cell esds are
taken
into account individually in the estimation of esds in distances,
angles
and torsion angles; correlations between esds in cell parameters are
only
used when they are defined by crystal symmetry.  An approximate
(isotropic)
treatment of cell esds is used for estimating esds involving l.s.
planes.
;

loop_
_geom_bond_atom_site_label_1
_geom_bond_atom_site_label_2
_geom_bond_distance
_geom_bond_site_symmetry_2
_geom_bond_publ_flag
Cu1 S3 2.3005(15) . y
Cu1 S1 2.3060(15) . y
Cu1 S2 2.5871(16) . y
Cu1 I1 2.5932(9) . y
Cu1 Cu2 3.0268(12) . y
Cu1 N31 3.261(5) . y
Cu1 Cu3 3.8778(12) . y
Cu1 Cu2 4.0782(11) 2_656 y
Cu1 S2 4.4277(16) 2_656 y
Cu1 S1 4.6402(17) 2_656 y
Cu1 Cu1 4.9662(16) 2_656 y
Cu2 S3 2.2970(14) 2_656 y
Cu2 S2 2.3062(15) . y
Cu2 S1 2.5643(16) . y
Cu2 I3 2.5867(9) 1_455 y
Cu2 N21 3.440(4) . y
Cu2 Cu1 4.0782(11) 2_656 y
Cu2 Cu3 4.3314(13) . y
Cu2 S1 4.6265(16) 2_656 y
Cu2 S2 4.7021(17) 2_656 y
Cu2 Cu2 5.1888(17) 2_656 y
Cu3 S2 2.2750(15) 2_656 y
Cu3 S1 2.3134(15) . y
Cu3 I2 2.5776(9) . y
Cu3 I3 2.9094(10) . y
Cu3 N11 3.324(5) . y
Cu3 S3 4.0656(16) . y
I3 Cu2 2.5867(9) 1_655 y
S1 C11 1.728(5) . ?
S1 S2 3.7240(18) 2_656 y
S1 S3 3.7755(19) . y
S1 S2 3.8232(19) . y
S1 Cu2 4.6265(16) 2_656 y
S1 Cu1 4.6402(17) 2_656 y
S1 S1 5.389(3) 2_656 y
S2 C21 1.737(5) . ?
S2 Cu3 2.2750(15) 2_656 y
S2 S3 3.690(2) . y
S2 S1 3.7240(18) 2_656 y
S2 Cu1 4.4277(16) 2_656 y
S2 Cu2 4.7021(17) 2_656 y
S2 S2 5.285(3) 2_656 y
S3 C31 1.731(5) . ?
S3 Cu2 2.2970(14) 2_656 y
S3 S1 3.6308(19) 2_656 y
S3 S2 3.643(2) 2_656 y
N11 C11 1.343(7) . ?
N11 C15 1.354(7) . ?
N11 H11A 0.8854 . ?
N21 C25 1.340(7) . ?
N21 C21 1.343(6) . ?
N21 H21A 0.9419 . ?
N31 C35 1.343(8) . ?
N31 C31 1.348(7) . ?
N31 H31A 0.8595 . ?
C11 C12 1.406(7) . ?
C12 C13 1.371(8) . ?
C12 H12 0.9300 . ?
C13 C14 1.402(9) . ?
C13 H13 0.9299 . ?
C14 C15 1.329(9) . ?
C14 H14 0.9300 . ?
C15 H15 0.9300 . ?
C21 C22 1.390(7) . ?
C22 C23 1.370(8) . ?
C22 H22 0.9301 . ?
C23 C24 1.393(9) . ?
C23 H23 0.9300 . ?
C24 C25 1.339(9) . ?
C24 H24 0.9300 . ?
C25 H25 0.9300 . ?
C31 C32 1.380(7) . ?
C32 C33 1.364(9) . ?
C32 H32 0.9300 . ?
C33 C34 1.392(10) . ?
C33 H33 0.9300 . ?
C34 C35 1.339(10) . ?
C34 H34 0.9299 . ?
C35 H35 0.9299 . ?
N1 C1 1.063(11) . ?
C1 C2 1.392(17) . ?
C2 H2A 0.9600 . ?
C2 H2B 0.9599 . ?
C2 H2C 0.9600 . ?

loop_
_geom_angle_atom_site_label_1
_geom_angle_atom_site_label_2
_geom_angle_atom_site_label_3
_geom_angle
_geom_angle_site_symmetry_1
_geom_angle_site_symmetry_3
_geom_angle_publ_flag
S3 Cu1 S1 110.09(5) . . y
S3 Cu1 S2 97.86(5) . . y
S1 Cu1 S2 102.61(5) . . y
S3 Cu1 I1 118.08(5) . . y
S1 Cu1 I1 119.59(4) . . y
S2 Cu1 I1 104.53(4) . . y
S3 Cu1 Cu2 118.52(4) . . ?
S1 Cu1 Cu2 55.52(4) . . ?
S2 Cu1 Cu2 47.72(4) . . ?
I1 Cu1 Cu2 119.22(3) . . ?
S3 Cu1 N31 53.94(9) . . ?
S1 Cu1 N31 163.53(9) . . ?
S2 Cu1 N31 77.94(10) . . ?
I1 Cu1 N31 75.51(9) . . ?
Cu2 Cu1 N31 125.19(10) . . ?
S3 Cu1 Cu3 77.70(4) . . ?
S1 Cu1 Cu3 32.98(4) . . ?
S2 Cu1 Cu3 113.93(4) . . ?
I1 Cu1 Cu3 136.05(3) . . ?
Cu2 Cu1 Cu3 76.61(3) . . ?
N31 Cu1 Cu3 131.62(9) . . ?
S3 Cu1 Cu2 27.47(4) . 2_656 ?
S1 Cu1 Cu2 88.34(4) . 2_656 ?
S2 Cu1 Cu2 86.70(4) . 2_656 ?
I1 Cu1 Cu2 145.53(3) . 2_656 ?
Cu2 Cu1 Cu2 92.62(3) . 2_656 ?
N31 Cu1 Cu2 75.22(8) . 2_656 ?
Cu3 Cu1 Cu2 59.84(2) . 2_656 ?
S3 Cu1 S2 55.20(4) . 2_656 ?
S1 Cu1 S2 57.23(4) . 2_656 ?
S2 Cu1 S2 94.09(4) . 2_656 ?
I1 Cu1 S2 161.17(4) . 2_656 ?
Cu2 Cu1 S2 75.62(3) . 2_656 ?
N31 Cu1 S2 106.32(9) . 2_656 ?
Cu3 Cu1 S2 30.90(2) . 2_656 ?
Cu2 Cu1 S2 31.12(2) 2_656 2_656 ?
S3 Cu1 S1 50.29(4) . 2_656 ?
S1 Cu1 S1 95.86(4) . 2_656 ?
S2 Cu1 S1 53.27(3) . 2_656 ?
I1 Cu1 S1 142.90(3) . 2_656 ?
Cu2 Cu1 S1 70.69(3) . 2_656 ?
N31 Cu1 S1 71.04(9) . 2_656 ?
Cu3 Cu1 S1 79.88(2) . 2_656 ?
Cu2 Cu1 S1 33.42(2) 2_656 2_656 ?
S2 Cu1 S1 49.81(2) 2_656 2_656 ?
S3 Cu1 Cu1 64.05(4) . 2_656 ?
S1 Cu1 Cu1 68.35(4) . 2_656 ?
S2 Cu1 Cu1 62.79(3) . 2_656 ?
I1 Cu1 Cu1 167.05(4) . 2_656 ?
Cu2 Cu1 Cu1 55.12(2) . 2_656 ?
N31 Cu1 Cu1 98.15(9) . 2_656 ?
Cu3 Cu1 Cu1 56.38(2) . 2_656 ?
Cu2 Cu1 Cu1 37.506(17) 2_656 2_656 ?
S2 Cu1 Cu1 31.31(2) 2_656 2_656 ?
S1 Cu1 Cu1 27.511(19) 2_656 2_656 ?
S3 Cu2 S2 104.63(5) 2_656 . y
S3 Cu2 S1 96.49(5) 2_656 . y
S2 Cu2 S1 103.31(5) . . y
S3 Cu2 I3 121.29(5) 2_656 1_455 y
S2 Cu2 I3 120.89(4) . 1_455 y
S1 Cu2 I3 105.98(4) . 1_455 y
S3 Cu2 Cu1 113.39(5) 2_656 . ?
S2 Cu2 Cu1 56.10(4) . . ?
S1 Cu2 Cu1 47.84(4) . . ?
I3 Cu2 Cu1 121.99(3) 1_455 . ?
S3 Cu2 N21 145.05(9) 2_656 . ?
S2 Cu2 N21 50.54(8) . . ?
S1 Cu2 N21 111.94(8) . . ?
I3 Cu2 N21 71.02(8) 1_455 . ?
Cu1 Cu2 N21 75.60(8) . . ?
S3 Cu2 Cu1 27.52(4) 2_656 2_656 ?
S2 Cu2 Cu1 82.84(4) . 2_656 ?
S1 Cu2 Cu1 85.40(4) . 2_656 ?
I3 Cu2 Cu1 148.81(3) 1_455 2_656 ?
Cu1 Cu2 Cu1 87.38(3) . 2_656 ?
N21 Cu2 Cu1 132.25(8) . 2_656 ?
S3 Cu2 Cu3 70.72(4) 2_656 . ?
S2 Cu2 Cu3 106.84(4) . . ?
S1 Cu2 Cu3 25.89(3) . . ?
I3 Cu2 Cu3 121.43(3) 1_455 . ?
Cu1 Cu2 Cu3 60.57(3) . . ?
N21 Cu2 Cu3 134.37(8) . . ?
Cu1 Cu2 Cu3 61.20(2) 2_656 . ?
S3 Cu2 S1 54.22(4) 2_656 2_656 ?
S2 Cu2 S1 52.96(4) . 2_656 ?
S1 Cu2 S1 92.55(4) . 2_656 ?
I3 Cu2 S1 161.46(3) 1_455 2_656 ?
Cu1 Cu2 S1 71.18(3) . 2_656 ?
N21 Cu2 S1 102.88(8) . 2_656 ?
Cu1 Cu2 S1 29.88(2) 2_656 2_656 ?
Cu3 Cu2 S1 75.67(3) . 2_656 ?
S3 Cu2 S2 50.39(4) 2_656 2_656 ?
S2 Cu2 S2 91.33(4) . 2_656 ?
S1 Cu2 S2 52.09(4) . 2_656 ?
I3 Cu2 S2 146.22(3) 1_455 2_656 ?
Cu1 Cu2 S2 65.80(3) . 2_656 ?
N21 Cu2 S2 137.28(8) . 2_656 ?
Cu1 Cu2 S2 33.32(2) 2_656 2_656 ?
Cu3 Cu2 S2 28.80(2) . 2_656 ?
S1 Cu2 S2 48.38(2) 2_656 2_656 ?
S3 Cu2 Cu2 62.26(4) 2_656 2_656 ?
S2 Cu2 Cu2 64.95(4) . 2_656 ?
S1 Cu2 Cu2 62.97(4) . 2_656 ?
I3 Cu2 Cu2 168.93(4) 1_455 2_656 ?
Cu1 Cu2 Cu2 51.73(2) . 2_656 ?
N21 Cu2 Cu2 112.54(8) . 2_656 ?
Cu1 Cu2 Cu2 35.642(16) 2_656 2_656 ?
Cu3 Cu2 Cu2 48.29(2) . 2_656 ?
S1 Cu2 Cu2 29.584(19) 2_656 2_656 ?
S2 Cu2 Cu2 26.381(19) 2_656 2_656 ?
S2 Cu3 S1 108.50(5) 2_656 . y
S2 Cu3 I2 122.51(5) 2_656 . y
S1 Cu3 I2 115.38(4) . . y
S2 Cu3 I3 105.23(5) 2_656 . y
S1 Cu3 I3 98.45(4) . . y
I2 Cu3 I3 103.12(3) . . y
S2 Cu3 N11 160.69(9) 2_656 . y
S1 Cu3 N11 52.34(9) . . y
I2 Cu3 N11 71.28(8) . . y
I3 Cu3 N11 82.38(9) . . y
S2 Cu3 Cu1 88.02(4) 2_656 . ?
S1 Cu3 Cu1 32.86(4) . . ?
I2 Cu3 Cu1 146.22(3) . . ?
I3 Cu3 Cu1 79.40(3) . . ?
N11 Cu3 Cu1 75.79(8) . . ?
S2 Cu3 S3 62.88(4) 2_656 . ?
S1 Cu3 S3 66.08(4) . . ?
I2 Cu3 S3 171.33(4) . . ?
I3 Cu3 S3 68.30(3) . . ?
N11 Cu3 S3 105.39(9) . . ?
Cu1 Cu3 S3 33.56(2) . . ?
S2 Cu3 Cu2 84.68(4) 2_656 . ?
S1 Cu3 Cu2 28.94(3) . . ?
I2 Cu3 Cu2 119.53(3) . . ?
I3 Cu3 Cu2 121.52(3) . . ?
N11 Cu3 Cu2 76.31(8) . . ?
Cu1 Cu3 Cu2 42.828(18) . . ?
S3 Cu3 Cu2 66.25(2) . . ?
Cu2 I3 Cu3 113.37(3) 1_655 . ?
C11 S1 Cu1 110.12(19) . . ?
C11 S1 Cu3 110.01(19) . . ?
Cu1 S1 Cu3 114.16(6) . . ?
C11 S1 Cu2 115.73(19) . . ?
Cu1 S1 Cu2 76.64(5) . . ?
Cu3 S1 Cu2 125.17(6) . . ?
C11 S1 S2 145.39(19) . 2_656 ?
Cu1 S1 S2 91.40(5) . 2_656 ?
Cu3 S1 S2 35.40(3) . 2_656 ?
Cu2 S1 S2 95.01(5) . 2_656 ?
C11 S1 S3 131.81(18) . . ?
Cu1 S1 S3 34.91(3) . . ?
Cu3 S1 S3 79.86(5) . . ?
Cu2 S1 S3 90.81(4) . . ?
S2 S1 S3 58.12(4) 2_656 . ?
C11 S1 S2 125.24(19) . . ?
Cu1 S1 S2 41.33(4) . . ?
Cu3 S1 S2 124.04(5) . . ?
Cu2 S1 S2 35.95(3) . . ?
S2 S1 S2 88.89(4) 2_656 . ?
S3 S1 S2 58.10(4) . . ?
C11 S1 Cu2 153.99(18) . 2_656 ?
Cu1 S1 Cu2 61.78(3) . 2_656 ?
Cu3 S1 Cu2 59.15(3) . 2_656 ?
Cu2 S1 Cu2 87.45(4) . 2_656 ?
S2 S1 Cu2 29.62(2) 2_656 2_656 ?
S3 S1 Cu2 29.58(2) . 2_656 ?
S2 S1 Cu2 66.84(3) . 2_656 ?
C11 S1 Cu1 164.80(18) . 2_656 ?
Cu1 S1 Cu1 84.14(4) . 2_656 ?
Cu3 S1 Cu1 66.65(3) . 2_656 ?
Cu2 S1 Cu1 61.17(3) . 2_656 ?
S2 S1 Cu1 33.84(3) 2_656 2_656 ?
S3 S1 Cu1 63.14(3) . 2_656 ?
S2 S1 Cu1 62.21(3) . 2_656 ?
Cu2 S1 Cu1 38.128(19) 2_656 2_656 ?
C11 S1 S1 168.01(19) . 2_656 ?
Cu1 S1 S1 58.94(3) . 2_656 ?
Cu3 S1 S1 80.43(4) . 2_656 ?
Cu2 S1 S1 59.06(3) . 2_656 ?
S2 S1 S1 45.18(3) 2_656 2_656 ?
S3 S1 S1 42.27(3) . 2_656 ?
S2 S1 S1 43.71(3) . 2_656 ?
Cu2 S1 S1 28.386(19) 2_656 2_656 ?
Cu1 S1 S1 25.196(18) 2_656 2_656 ?
C21 S2 Cu3 112.61(17) . 2_656 ?
C21 S2 Cu2 113.64(18) . . ?
Cu3 S2 Cu2 120.24(6) 2_656 . ?
C21 S2 Cu1 105.55(17) . . ?
Cu3 S2 Cu1 123.54(6) 2_656 . ?
Cu2 S2 Cu1 76.18(5) . . ?
C21 S2 S3 124.76(18) . . ?
Cu3 S2 S3 85.48(5) 2_656 . ?
Cu2 S2 S3 97.33(5) . . ?
Cu1 S2 S3 38.14(3) . . ?
C21 S2 S1 146.69(18) . 2_656 ?
Cu3 S2 S1 36.09(3) 2_656 2_656 ?
Cu2 S2 S1 97.42(5) . 2_656 ?
Cu1 S2 S1 92.89(5) . 2_656 ?
S3 S2 S1 58.65(3) . 2_656 ?
C21 S2 S1 120.09(17) . . ?
Cu3 S2 S1 126.93(5) 2_656 . ?
Cu2 S2 S1 40.75(4) . . ?
Cu1 S2 S1 36.06(3) . . ?
S3 S2 S1 60.30(3) . . ?
S1 S2 S1 91.11(4) 2_656 . ?
C21 S2 Cu1 168.27(17) . 2_656 ?
Cu3 S2 Cu1 61.08(3) 2_656 2_656 ?
Cu2 S2 Cu1 66.05(4) . 2_656 ?
Cu1 S2 Cu1 85.91(4) . 2_656 ?
S3 S2 Cu1 66.06(3) . 2_656 ?
S1 S2 Cu1 31.38(2) 2_656 2_656 ?
S1 S2 Cu1 67.99(3) . 2_656 ?
C21 S2 Cu2 150.79(18) . 2_656 ?
Cu3 S2 Cu2 66.52(4) 2_656 2_656 ?
Cu2 S2 Cu2 88.67(4) . 2_656 ?
Cu1 S2 Cu2 59.98(3) . 2_656 ?
S3 S2 Cu2 28.66(2) . 2_656 ?
S1 S2 Cu2 32.91(2) 2_656 2_656 ?
S1 S2 Cu2 64.78(3) . 2_656 ?
Cu1 S2 Cu2 38.576(18) 2_656 2_656 ?
C21 S2 S2 162.08(17) . 2_656 ?
Cu3 S2 S2 82.26(4) 2_656 2_656 ?
Cu2 S2 S2 62.80(4) . 2_656 ?
Cu1 S2 S2 56.68(3) . 2_656 ?
S3 S2 S2 43.53(3) . 2_656 ?
S1 S2 S2 46.32(3) 2_656 2_656 ?
S1 S2 S2 44.79(3) . 2_656 ?
Cu1 S2 S2 29.226(19) 2_656 2_656 ?
Cu2 S2 S2 25.864(18) 2_656 2_656 ?
C31 S3 Cu2 109.19(17) . 2_656 ?
C31 S3 Cu1 107.28(18) . . ?
Cu2 S3 Cu1 125.01(6) 2_656 . ?
C31 S3 S1 85.58(17) . 2_656 ?
Cu2 S3 S1 44.57(4) 2_656 2_656 ?
Cu1 S3 S1 100.54(5) . 2_656 ?
C31 S3 S2 145.57(17) . 2_656 ?
Cu2 S3 S2 37.77(3) 2_656 2_656 ?
Cu1 S3 S2 93.56(5) . 2_656 ?
S1 S3 S2 63.42(4) 2_656 2_656 ?
C31 S3 S2 84.80(19) . . ?
Cu2 S3 S2 100.95(5) 2_656 . ?
Cu1 S3 S2 43.99(4) . . ?
S1 S3 S2 61.15(3) 2_656 . ?
S2 S3 S2 92.23(4) 2_656 . ?
C31 S3 S1 141.39(18) . . ?
Cu2 S3 S1 96.20(5) 2_656 . ?
Cu1 S3 S1 35.00(3) . . ?
S1 S3 S1 93.34(4) 2_656 . ?
S2 S3 S1 60.23(3) 2_656 . ?
S2 S3 S1 61.60(4) . . ?
C31 S3 Cu3 174.24(19) . . ?
Cu2 S3 Cu3 71.18(4) 2_656 . ?
Cu1 S3 Cu3 68.73(4) . . ?
S1 S3 Cu3 91.03(4) 2_656 . ?
S2 S3 Cu3 33.77(3) 2_656 . ?
S2 S3 Cu3 89.48(4) . . ?
S1 S3 Cu3 34.06(2) . . ?
C11 N11 C15 123.6(5) . . ?
C11 N11 Cu3 78.5(3) . . ?
C15 N11 Cu3 157.3(4) . . ?
C11 N11 H11A 110.4 . . ?
C15 N11 H11A 125.9 . . ?
Cu3 N11 H11A 32.0 . . ?
C25 N21 C21 123.8(5) . . ?
C25 N21 Cu2 159.3(4) . . ?
C21 N21 Cu2 76.9(3) . . ?
C25 N21 H21A 126.9 . . ?
C21 N21 H21A 109.0 . . ?
Cu2 N21 H21A 32.6 . . ?
C35 N31 C31 124.2(5) . . ?
C35 N31 Cu1 157.1(4) . . ?
C31 N31 Cu1 78.2(3) . . ?
C35 N31 H31A 116.0 . . ?
C31 N31 H31A 119.7 . . ?
Cu1 N31 H31A 41.6 . . ?
N11 C11 C12 116.9(5) . . ?
N11 C11 S1 118.6(4) . . ?
C12 C11 S1 124.5(4) . . ?
C13 C12 C11 119.4(6) . . ?
C13 C12 H12 120.3 . . ?
C11 C12 H12 120.3 . . ?
C12 C13 C14 120.9(6) . . ?
C12 C13 H13 119.9 . . ?
C14 C13 H13 119.1 . . ?
C15 C14 C13 118.1(6) . . ?
C15 C14 H14 121.0 . . ?
C13 C14 H14 120.9 . . ?
C14 C15 N11 121.0(6) . . ?
C14 C15 H15 119.5 . . ?
N11 C15 H15 119.4 . . ?
N21 C21 C22 116.7(5) . . ?
N21 C21 S2 118.8(4) . . ?
C22 C21 S2 124.5(4) . . ?
C23 C22 C21 120.5(6) . . ?
C23 C22 H22 119.7 . . ?
C21 C22 H22 119.8 . . ?
C22 C23 C24 119.8(6) . . ?
C22 C23 H23 120.2 . . ?
C24 C23 H23 120.1 . . ?
C25 C24 C23 118.7(6) . . ?
C25 C24 H24 120.5 . . ?
C23 C24 H24 120.8 . . ?
C24 C25 N21 120.5(6) . . ?
C24 C25 H25 119.5 . . ?
N21 C25 H25 120.0 . . ?
N31 C31 C32 116.6(5) . . ?
N31 C31 S3 119.3(4) . . ?
C32 C31 S3 124.1(4) . . ?
C33 C32 C31 120.0(6) . . ?
C33 C32 H32 120.0 . . ?
C31 C32 H32 120.0 . . ?
C32 C33 C34 121.2(6) . . ?
C32 C33 H33 119.9 . . ?
C34 C33 H33 118.9 . . ?
C35 C34 C33 117.8(6) . . ?
C35 C34 H34 121.0 . . ?
C33 C34 H34 121.2 . . ?
C34 C35 N31 120.1(6) . . ?
C34 C35 H35 120.1 . . ?
N31 C35 H35 119.8 . . ?
N1 C1 C2 175(2) . . ?
C1 C2 H2A 111.0 . . ?
C1 C2 H2B 109.7 . . ?
H2A C2 H2B 109.5 . . ?
C1 C2 H2C 107.7 . . ?
H2A C2 H2C 109.5 . . ?
H2B C2 H2C 109.5 . . ?

loop_
_geom_torsion_atom_site_label_1
_geom_torsion_atom_site_label_2
_geom_torsion_atom_site_label_3
_geom_torsion_atom_site_label_4
_geom_torsion
_geom_torsion_site_symmetry_1
_geom_torsion_site_symmetry_2
_geom_torsion_site_symmetry_3
_geom_torsion_site_symmetry_4
_geom_torsion_publ_flag
S3 Cu1 Cu2 S3 -18.83(9) . . . 2_656 ?
S1 Cu1 Cu2 S3 76.96(6) . . . 2_656 ?
S2 Cu1 Cu2 S3 -92.35(6) . . . 2_656 ?
I1 Cu1 Cu2 S3 -175.45(5) . . . 2_656 ?
N31 Cu1 Cu2 S3 -82.95(11) . . . 2_656 ?
Cu3 Cu1 Cu2 S3 48.92(5) . . . 2_656 ?
Cu2 Cu1 Cu2 S3 -9.22(4) 2_656 . . 2_656 ?
S2 Cu1 Cu2 S3 17.09(5) 2_656 . . 2_656 ?
S1 Cu1 Cu2 S3 -34.88(5) 2_656 . . 2_656 ?
Cu1 Cu1 Cu2 S3 -9.22(4) 2_656 . . 2_656 ?
S3 Cu1 Cu2 S2 73.51(6) . . . . ?
S1 Cu1 Cu2 S2 169.31(6) . . . . ?
I1 Cu1 Cu2 S2 -83.10(5) . . . . ?
N31 Cu1 Cu2 S2 9.39(11) . . . . ?
Cu3 Cu1 Cu2 S2 141.27(4) . . . . ?
Cu2 Cu1 Cu2 S2 83.13(4) 2_656 . . . ?
S2 Cu1 Cu2 S2 109.43(4) 2_656 . . . ?
S1 Cu1 Cu2 S2 57.47(4) 2_656 . . . ?
Cu1 Cu1 Cu2 S2 83.13(4) 2_656 . . . ?
S3 Cu1 Cu2 S1 -95.79(6) . . . . ?
S2 Cu1 Cu2 S1 -169.31(6) . . . . ?
I1 Cu1 Cu2 S1 107.59(5) . . . . ?
N31 Cu1 Cu2 S1 -159.91(11) . . . . ?
Cu3 Cu1 Cu2 S1 -28.04(4) . . . . ?
Cu2 Cu1 Cu2 S1 -86.18(4) 2_656 . . . ?
S2 Cu1 Cu2 S1 -59.88(4) 2_656 . . . ?
S1 Cu1 Cu2 S1 -111.84(4) 2_656 . . . ?
Cu1 Cu1 Cu2 S1 -86.18(4) 2_656 . . . ?
S3 Cu1 Cu2 I3 -178.45(5) . . . 1_455 ?
S1 Cu1 Cu2 I3 -82.66(5) . . . 1_455 ?
S2 Cu1 Cu2 I3 108.03(5) . . . 1_455 ?
I1 Cu1 Cu2 I3 24.93(5) . . . 1_455 ?
N31 Cu1 Cu2 I3 117.43(11) . . . 1_455 ?
Cu3 Cu1 Cu2 I3 -110.70(4) . . . 1_455 ?
Cu2 Cu1 Cu2 I3 -168.84(4) 2_656 . . 1_455 ?
S2 Cu1 Cu2 I3 -142.53(4) 2_656 . . 1_455 ?
S1 Cu1 Cu2 I3 165.50(4) 2_656 . . 1_455 ?
Cu1 Cu1 Cu2 I3 -168.84(4) 2_656 . . 1_455 ?
S3 Cu1 Cu2 N21 125.35(9) . . . . ?
S1 Cu1 Cu2 N21 -138.86(9) . . . . ?
S2 Cu1 Cu2 N21 51.84(9) . . . . ?
I1 Cu1 Cu2 N21 -31.26(8) . . . . ?
N31 Cu1 Cu2 N21 61.23(13) . . . . ?
Cu3 Cu1 Cu2 N21 -166.89(8) . . . . ?
Cu2 Cu1 Cu2 N21 134.97(8) 2_656 . . . ?
S2 Cu1 Cu2 N21 161.27(8) 2_656 . . . ?
S1 Cu1 Cu2 N21 109.30(8) 2_656 . . . ?
Cu1 Cu1 Cu2 N21 134.97(8) 2_656 . . . ?
S3 Cu1 Cu2 Cu1 -9.62(4) . . . 2_656 ?
S1 Cu1 Cu2 Cu1 86.18(4) . . . 2_656 ?
S2 Cu1 Cu2 Cu1 -83.13(4) . . . 2_656 ?
I1 Cu1 Cu2 Cu1 -166.23(4) . . . 2_656 ?
N31 Cu1 Cu2 Cu1 -73.74(10) . . . 2_656 ?
Cu3 Cu1 Cu2 Cu1 58.14(2) . . . 2_656 ?
Cu2 Cu1 Cu2 Cu1 0.0 2_656 . . 2_656 ?
S2 Cu1 Cu2 Cu1 26.301(19) 2_656 . . 2_656 ?
S1 Cu1 Cu2 Cu1 -25.664(19) 2_656 . . 2_656 ?
S3 Cu1 Cu2 Cu3 -67.75(5) . . . . ?
S1 Cu1 Cu2 Cu3 28.04(4) . . . . ?
S2 Cu1 Cu2 Cu3 -141.27(4) . . . . ?
I1 Cu1 Cu2 Cu3 135.63(4) . . . . ?
N31 Cu1 Cu2 Cu3 -131.87(10) . . . . ?
Cu2 Cu1 Cu2 Cu3 -58.14(2) 2_656 . . . ?
S2 Cu1 Cu2 Cu3 -31.84(2) 2_656 . . . ?
S1 Cu1 Cu2 Cu3 -83.80(2) 2_656 . . . ?
Cu1 Cu1 Cu2 Cu3 -58.14(2) 2_656 . . . ?
S3 Cu1 Cu2 S1 16.05(5) . . . 2_656 ?
S1 Cu1 Cu2 S1 111.84(4) . . . 2_656 ?
S2 Cu1 Cu2 S1 -57.47(4) . . . 2_656 ?
I1 Cu1 Cu2 S1 -140.57(4) . . . 2_656 ?
N31 Cu1 Cu2 S1 -48.07(10) . . . 2_656 ?
Cu3 Cu1 Cu2 S1 83.80(2) . . . 2_656 ?
Cu2 Cu1 Cu2 S1 25.664(19) 2_656 . . 2_656 ?
S2 Cu1 Cu2 S1 51.96(2) 2_656 . . 2_656 ?
Cu1 Cu1 Cu2 S1 25.664(19) 2_656 . . 2_656 ?
S3 Cu1 Cu2 S2 -35.92(5) . . . 2_656 ?
S1 Cu1 Cu2 S2 59.88(4) . . . 2_656 ?
S2 Cu1 Cu2 S2 -109.43(4) . . . 2_656 ?
I1 Cu1 Cu2 S2 167.47(4) . . . 2_656 ?
N31 Cu1 Cu2 S2 -100.04(11) . . . 2_656 ?
Cu3 Cu1 Cu2 S2 31.84(2) . . . 2_656 ?
Cu2 Cu1 Cu2 S2 -26.301(19) 2_656 . . 2_656 ?
S1 Cu1 Cu2 S2 -51.96(2) 2_656 . . 2_656 ?
Cu1 Cu1 Cu2 S2 -26.301(19) 2_656 . . 2_656 ?
S3 Cu1 Cu2 Cu2 -9.62(4) . . . 2_656 ?
S1 Cu1 Cu2 Cu2 86.18(4) . . . 2_656 ?
S2 Cu1 Cu2 Cu2 -83.13(4) . . . 2_656 ?
I1 Cu1 Cu2 Cu2 -166.23(4) . . . 2_656 ?
N31 Cu1 Cu2 Cu2 -73.74(10) . . . 2_656 ?
Cu3 Cu1 Cu2 Cu2 58.14(2) . . . 2_656 ?
S2 Cu1 Cu2 Cu2 26.301(19) 2_656 . . 2_656 ?
S1 Cu1 Cu2 Cu2 -25.664(19) 2_656 . . 2_656 ?
Cu1 Cu1 Cu2 Cu2 0.0 2_656 . . 2_656 ?
S3 Cu1 Cu3 S2 39.36(5) . . . 2_656 ?
S1 Cu1 Cu3 S2 -129.69(8) . . . 2_656 ?
S2 Cu1 Cu3 S2 -53.87(7) . . . 2_656 ?
I1 Cu1 Cu3 S2 157.27(5) . . . 2_656 ?
Cu2 Cu1 Cu3 S2 -84.30(4) . . . 2_656 ?
N31 Cu1 Cu3 S2 41.20(13) . . . 2_656 ?
Cu2 Cu1 Cu3 S2 16.81(4) 2_656 . . 2_656 ?
S1 Cu1 Cu3 S2 -11.93(4) 2_656 . . 2_656 ?
Cu1 Cu1 Cu3 S2 -27.51(4) 2_656 . . 2_656 ?
S3 Cu1 Cu3 S1 169.05(8) . . . . ?
S2 Cu1 Cu3 S1 75.82(7) . . . . ?
I1 Cu1 Cu3 S1 -73.04(7) . . . . ?
Cu2 Cu1 Cu3 S1 45.39(6) . . . . ?
N31 Cu1 Cu3 S1 170.89(14) . . . . ?
Cu2 Cu1 Cu3 S1 146.50(7) 2_656 . . . ?
S2 Cu1 Cu3 S1 129.69(8) 2_656 . . . ?
S1 Cu1 Cu3 S1 117.76(6) 2_656 . . . ?
Cu1 Cu1 Cu3 S1 102.18(7) 2_656 . . . ?
S3 Cu1 Cu3 I2 -164.33(7) . . . . ?
S1 Cu1 Cu3 I2 26.62(8) . . . . ?
S2 Cu1 Cu3 I2 102.43(7) . . . . ?
I1 Cu1 Cu3 I2 -46.42(9) . . . . ?
Cu2 Cu1 Cu3 I2 72.01(6) . . . . ?
N31 Cu1 Cu3 I2 -162.49(13) . . . . ?
Cu2 Cu1 Cu3 I2 173.12(7) 2_656 . . . ?
S2 Cu1 Cu3 I2 156.31(8) 2_656 . . . ?
S1 Cu1 Cu3 I2 144.38(6) 2_656 . . . ?
Cu1 Cu1 Cu3 I2 128.80(6) 2_656 . . . ?
S3 Cu1 Cu3 I3 -66.53(4) . . . . ?
S1 Cu1 Cu3 I3 124.42(7) . . . . ?
S2 Cu1 Cu3 I3 -159.77(4) . . . . ?
I1 Cu1 Cu3 I3 51.37(5) . . . . ?
Cu2 Cu1 Cu3 I3 169.80(2) . . . . ?
N31 Cu1 Cu3 I3 -64.69(13) . . . . ?
Cu2 Cu1 Cu3 I3 -89.08(3) 2_656 . . . ?
S2 Cu1 Cu3 I3 -105.89(4) 2_656 . . . ?
S1 Cu1 Cu3 I3 -117.82(2) 2_656 . . . ?
Cu1 Cu1 Cu3 I3 -133.40(2) 2_656 . . . ?
S3 Cu1 Cu3 N11 -151.26(10) . . . . ?
S1 Cu1 Cu3 N11 39.68(11) . . . . ?
S2 Cu1 Cu3 N11 115.50(10) . . . . ?
I1 Cu1 Cu3 N11 -33.36(10) . . . . ?
Cu2 Cu1 Cu3 N11 85.07(9) . . . . ?
N31 Cu1 Cu3 N11 -149.42(15) . . . . ?
Cu2 Cu1 Cu3 N11 -173.81(9) 2_656 . . . ?
S2 Cu1 Cu3 N11 169.37(10) 2_656 . . . ?
S1 Cu1 Cu3 N11 157.45(9) 2_656 . . . ?
Cu1 Cu1 Cu3 N11 141.87(9) 2_656 . . . ?
S1 Cu1 Cu3 S3 -169.05(8) . . . . ?
S2 Cu1 Cu3 S3 -93.24(5) . . . . ?
I1 Cu1 Cu3 S3 117.91(6) . . . . ?
Cu2 Cu1 Cu3 S3 -123.66(5) . . . . ?
N31 Cu1 Cu3 S3 1.84(13) . . . . ?
Cu2 Cu1 Cu3 S3 -22.55(4) 2_656 . . . ?
S2 Cu1 Cu3 S3 -39.36(5) 2_656 . . . ?
S1 Cu1 Cu3 S3 -51.29(4) 2_656 . . . ?
Cu1 Cu1 Cu3 S3 -66.87(4) 2_656 . . . ?
S3 Cu1 Cu3 Cu2 123.66(5) . . . . ?
S1 Cu1 Cu3 Cu2 -45.39(6) . . . . ?
S2 Cu1 Cu3 Cu2 30.43(4) . . . . ?
I1 Cu1 Cu3 Cu2 -118.43(5) . . . . ?
N31 Cu1 Cu3 Cu2 125.51(13) . . . . ?
Cu2 Cu1 Cu3 Cu2 101.12(3) 2_656 . . . ?
S2 Cu1 Cu3 Cu2 84.30(4) 2_656 . . . ?
S1 Cu1 Cu3 Cu2 72.37(3) 2_656 . . . ?
Cu1 Cu1 Cu3 Cu2 56.79(2) 2_656 . . . ?
S3 Cu2 Cu3 S2 -40.02(5) 2_656 . . 2_656 ?
S2 Cu2 Cu3 S2 59.98(6) . . . 2_656 ?
S1 Cu2 Cu3 S2 145.79(9) . . . 2_656 ?
I3 Cu2 Cu3 S2 -155.56(5) 1_455 . . 2_656 ?
Cu1 Cu2 Cu3 S2 92.84(4) . . . 2_656 ?
N21 Cu2 Cu3 S2 110.73(11) . . . 2_656 ?
Cu1 Cu2 Cu3 S2 -11.65(4) 2_656 . . 2_656 ?
S1 Cu2 Cu3 S2 16.62(4) 2_656 . . 2_656 ?
Cu2 Cu2 Cu3 S2 29.56(4) 2_656 . . 2_656 ?
S3 Cu2 Cu3 S1 174.19(9) 2_656 . . . ?
S2 Cu2 Cu3 S1 -85.81(8) . . . . ?
I3 Cu2 Cu3 S1 58.65(8) 1_455 . . . ?
Cu1 Cu2 Cu3 S1 -52.95(7) . . . . ?
N21 Cu2 Cu3 S1 -35.06(13) . . . . ?
Cu1 Cu2 Cu3 S1 -157.44(8) 2_656 . . . ?
S1 Cu2 Cu3 S1 -129.18(7) 2_656 . . . ?
S2 Cu2 Cu3 S1 -145.79(9) 2_656 . . . ?
Cu2 Cu2 Cu3 S1 -116.23(8) 2_656 . . . ?
S3 Cu2 Cu3 I2 84.56(5) 2_656 . . . ?
S2 Cu2 Cu3 I2 -175.44(4) . . . . ?
S1 Cu2 Cu3 I2 -89.63(8) . . . . ?
I3 Cu2 Cu3 I2 -30.98(4) 1_455 . . . ?
Cu1 Cu2 Cu3 I2 -142.58(4) . . . . ?
N21 Cu2 Cu3 I2 -124.68(11) . . . . ?
Cu1 Cu2 Cu3 I2 112.93(4) 2_656 . . . ?
S1 Cu2 Cu3 I2 141.20(3) 2_656 . . . ?
S2 Cu2 Cu3 I2 124.58(5) 2_656 . . . ?
Cu2 Cu2 Cu3 I2 154.14(4) 2_656 . . . ?
S3 Cu2 Cu3 I3 -144.64(4) 2_656 . . . ?
S2 Cu2 Cu3 I3 -44.64(5) . . . . ?
S1 Cu2 Cu3 I3 41.17(7) . . . . ?
I3 Cu2 Cu3 I3 99.82(4) 1_455 . . . ?
Cu1 Cu2 Cu3 I3 -11.78(3) . . . . ?
N21 Cu2 Cu3 I3 6.12(11) . . . . ?
Cu1 Cu2 Cu3 I3 -116.27(3) 2_656 . . . ?
S1 Cu2 Cu3 I3 -88.00(3) 2_656 . . . ?
S2 Cu2 Cu3 I3 -104.62(5) 2_656 . . . ?
Cu2 Cu2 Cu3 I3 -75.06(3) 2_656 . . . ?
S3 Cu2 Cu3 N11 143.39(10) 2_656 . . . ?
S2 Cu2 Cu3 N11 -116.61(10) . . . . ?
S1 Cu2 Cu3 N11 -30.80(11) . . . . ?
I3 Cu2 Cu3 N11 27.85(9) 1_455 . . . ?
Cu1 Cu2 Cu3 N11 -83.75(9) . . . . ?
N21 Cu2 Cu3 N11 -65.86(14) . . . . ?
Cu1 Cu2 Cu3 N11 171.76(9) 2_656 . . . ?
S1 Cu2 Cu3 N11 -159.98(9) 2_656 . . . ?
S2 Cu2 Cu3 N11 -176.59(10) 2_656 . . . ?
Cu2 Cu2 Cu3 N11 -147.03(9) 2_656 . . . ?
S3 Cu2 Cu3 Cu1 -132.86(5) 2_656 . . . ?
S2 Cu2 Cu3 Cu1 -32.86(4) . . . . ?
S1 Cu2 Cu3 Cu1 52.95(7) . . . . ?
I3 Cu2 Cu3 Cu1 111.60(4) 1_455 . . . ?
N21 Cu2 Cu3 Cu1 17.89(11) . . . . ?
Cu1 Cu2 Cu3 Cu1 -104.49(2) 2_656 . . . ?
S1 Cu2 Cu3 Cu1 -76.22(3) 2_656 . . . ?
S2 Cu2 Cu3 Cu1 -92.84(4) 2_656 . . . ?
Cu2 Cu2 Cu3 Cu1 -63.28(2) 2_656 . . . ?
S3 Cu2 Cu3 S3 -102.68(4) 2_656 . . . ?
S2 Cu2 Cu3 S3 -2.68(4) . . . . ?
S1 Cu2 Cu3 S3 83.13(8) . . . . ?
I3 Cu2 Cu3 S3 141.78(4) 1_455 . . . ?
Cu1 Cu2 Cu3 S3 30.18(3) . . . . ?
N21 Cu2 Cu3 S3 48.07(11) . . . . ?
Cu1 Cu2 Cu3 S3 -74.31(3) 2_656 . . . ?
S1 Cu2 Cu3 S3 -46.04(3) 2_656 . . . ?
S2 Cu2 Cu3 S3 -62.66(4) 2_656 . . . ?
Cu2 Cu2 Cu3 S3 -33.10(2) 2_656 . . . ?
S2 Cu3 I3 Cu2 20.56(5) 2_656 . . 1_655 ?
S1 Cu3 I3 Cu2 132.45(4) . . . 1_655 ?
I2 Cu3 I3 Cu2 -108.89(3) . . . 1_655 ?
N11 Cu3 I3 Cu2 -177.56(8) . . . 1_655 ?
Cu1 Cu3 I3 Cu2 105.55(3) . . . 1_655 ?
S3 Cu3 I3 Cu2 72.47(3) . . . 1_655 ?
Cu2 Cu3 I3 Cu2 113.66(3) . . . 1_655 ?
S3 Cu1 S1 C11 -135.7(2) . . . . ?
S2 Cu1 S1 C11 120.9(2) . . . . ?
I1 Cu1 S1 C11 5.9(2) . . . . ?
Cu2 Cu1 S1 C11 112.8(2) . . . . ?
N31 Cu1 S1 C11 -149.0(4) . . . . ?
Cu3 Cu1 S1 C11 -124.3(2) . . . . ?
Cu2 Cu1 S1 C11 -152.8(2) 2_656 . . . ?
S2 Cu1 S1 C11 -152.3(2) 2_656 . . . ?
S1 Cu1 S1 C11 174.6(2) 2_656 . . . ?
Cu1 Cu1 S1 C11 174.6(2) 2_656 . . . ?
S3 Cu1 S1 Cu3 -11.40(8) . . . . ?
S2 Cu1 S1 Cu3 -114.76(6) . . . . ?
I1 Cu1 S1 Cu3 130.24(5) . . . . ?
Cu2 Cu1 S1 Cu3 -122.85(7) . . . . ?
N31 Cu1 S1 Cu3 -24.7(4) . . . . ?
Cu2 Cu1 S1 Cu3 -28.52(6) 2_656 . . . ?
S2 Cu1 S1 Cu3 -28.03(4) 2_656 . . . ?
S1 Cu1 S1 Cu3 -61.13(5) 2_656 . . . ?
Cu1 Cu1 S1 Cu3 -61.13(5) 2_656 . . . ?
S3 Cu1 S1 Cu2 111.45(5) . . . . ?
S2 Cu1 S1 Cu2 8.09(4) . . . . ?
I1 Cu1 S1 Cu2 -106.92(5) . . . . ?
N31 Cu1 S1 Cu2 98.2(4) . . . . ?
Cu3 Cu1 S1 Cu2 122.85(7) . . . . ?
Cu2 Cu1 S1 Cu2 94.33(3) 2_656 . . . ?
S2 Cu1 S1 Cu2 94.81(4) 2_656 . . . ?
S1 Cu1 S1 Cu2 61.72(3) 2_656 . . . ?
Cu1 Cu1 S1 Cu2 61.72(3) 2_656 . . . ?
S3 Cu1 S1 S2 16.64(6) . . . 2_656 ?
S2 Cu1 S1 S2 -86.73(5) . . . 2_656 ?
I1 Cu1 S1 S2 158.27(4) . . . 2_656 ?
Cu2 Cu1 S1 S2 -94.81(4) . . . 2_656 ?
N31 Cu1 S1 S2 3.4(4) . . . 2_656 ?
Cu3 Cu1 S1 S2 28.03(4) . . . 2_656 ?
Cu2 Cu1 S1 S2 -0.48(3) 2_656 . . 2_656 ?
S1 Cu1 S1 S2 -33.10(3) 2_656 . . 2_656 ?
Cu1 Cu1 S1 S2 -33.10(3) 2_656 . . 2_656 ?
S2 Cu1 S1 S3 -103.36(6) . . . . ?
I1 Cu1 S1 S3 141.63(7) . . . . ?
Cu2 Cu1 S1 S3 -111.45(5) . . . . ?
N31 Cu1 S1 S3 -13.3(4) . . . . ?
Cu3 Cu1 S1 S3 11.40(8) . . . . ?
Cu2 Cu1 S1 S3 -17.12(4) 2_656 . . . ?
S2 Cu1 S1 S3 -16.64(6) 2_656 . . . ?
S1 Cu1 S1 S3 -49.73(5) 2_656 . . . ?
Cu1 Cu1 S1 S3 -49.73(5) 2_656 . . . ?
S3 Cu1 S1 S2 103.36(6) . . . . ?
I1 Cu1 S1 S2 -115.01(6) . . . . ?
Cu2 Cu1 S1 S2 -8.09(4) . . . . ?
N31 Cu1 S1 S2 90.1(4) . . . . ?
Cu3 Cu1 S1 S2 114.76(6) . . . . ?
Cu2 Cu1 S1 S2 86.24(4) 2_656 . . . ?
S2 Cu1 S1 S2 86.73(5) 2_656 . . . ?
S1 Cu1 S1 S2 53.63(4) 2_656 . . . ?
Cu1 Cu1 S1 S2 53.63(4) 2_656 . . . ?
S3 Cu1 S1 Cu2 17.12(4) . . . 2_656 ?
S2 Cu1 S1 Cu2 -86.24(4) . . . 2_656 ?
I1 Cu1 S1 Cu2 158.75(5) . . . 2_656 ?
Cu2 Cu1 S1 Cu2 -94.33(3) . . . 2_656 ?
N31 Cu1 S1 Cu2 3.9(4) . . . 2_656 ?
Cu3 Cu1 S1 Cu2 28.52(6) . . . 2_656 ?
S2 Cu1 S1 Cu2 0.48(3) 2_656 . . 2_656 ?
S1 Cu1 S1 Cu2 -32.613(19) 2_656 . . 2_656 ?
Cu1 Cu1 S1 Cu2 -32.613(19) 2_656 . . 2_656 ?
S3 Cu1 S1 Cu1 49.73(5) . . . 2_656 ?
S2 Cu1 S1 Cu1 -53.63(4) . . . 2_656 ?
I1 Cu1 S1 Cu1 -168.63(5) . . . 2_656 ?
Cu2 Cu1 S1 Cu1 -61.72(3) . . . 2_656 ?
N31 Cu1 S1 Cu1 36.5(4) . . . 2_656 ?
Cu3 Cu1 S1 Cu1 61.13(5) . . . 2_656 ?
Cu2 Cu1 S1 Cu1 32.613(19) 2_656 . . 2_656 ?
S2 Cu1 S1 Cu1 33.10(3) 2_656 . . 2_656 ?
S1 Cu1 S1 Cu1 0.0 2_656 . . 2_656 ?
S3 Cu1 S1 S1 49.73(5) . . . 2_656 ?
S2 Cu1 S1 S1 -53.63(4) . . . 2_656 ?
I1 Cu1 S1 S1 -168.63(5) . . . 2_656 ?
Cu2 Cu1 S1 S1 -61.72(3) . . . 2_656 ?
N31 Cu1 S1 S1 36.5(4) . . . 2_656 ?
Cu3 Cu1 S1 S1 61.13(5) . . . 2_656 ?
Cu2 Cu1 S1 S1 32.613(19) 2_656 . . 2_656 ?
S2 Cu1 S1 S1 33.10(3) 2_656 . . 2_656 ?
Cu1 Cu1 S1 S1 0.0 2_656 . . 2_656 ?
S2 Cu3 S1 C11 178.56(19) 2_656 . . . ?
I2 Cu3 S1 C11 -39.6(2) . . . . ?
I3 Cu3 S1 C11 69.31(19) . . . . ?
N11 Cu3 S1 C11 -4.2(2) . . . . ?
Cu1 Cu3 S1 C11 124.4(2) . . . . ?
S3 Cu3 S1 C11 131.0(2) . . . . ?
Cu2 Cu3 S1 C11 -145.3(2) . . . . ?
S2 Cu3 S1 Cu1 54.19(8) 2_656 . . . ?
I2 Cu3 S1 Cu1 -164.00(5) . . . . ?
I3 Cu3 S1 Cu1 -55.06(6) . . . . ?
N11 Cu3 S1 Cu1 -128.56(13) . . . . ?
S3 Cu3 S1 Cu1 6.60(5) . . . . ?
Cu2 Cu3 S1 Cu1 90.37(8) . . . . ?
S2 Cu3 S1 Cu2 -36.18(9) 2_656 . . . ?
I2 Cu3 S1 Cu2 105.63(7) . . . . ?
I3 Cu3 S1 Cu2 -145.43(6) . . . . ?
N11 Cu3 S1 Cu2 141.07(14) . . . . ?
Cu1 Cu3 S1 Cu2 -90.37(8) . . . . ?
S3 Cu3 S1 Cu2 -83.77(7) . . . . ?
I2 Cu3 S1 S2 141.81(7) . . . 2_656 ?
I3 Cu3 S1 S2 -109.25(5) . . . 2_656 ?
N11 Cu3 S1 S2 177.25(12) . . . 2_656 ?
Cu1 Cu3 S1 S2 -54.19(8) . . . 2_656 ?
S3 Cu3 S1 S2 -47.59(5) . . . 2_656 ?
Cu2 Cu3 S1 S2 36.18(9) . . . 2_656 ?
S2 Cu3 S1 S3 47.59(5) 2_656 . . . ?
I2 Cu3 S1 S3 -170.59(4) . . . . ?
I3 Cu3 S1 S3 -61.66(3) . . . . ?
N11 Cu3 S1 S3 -135.16(12) . . . . ?
Cu1 Cu3 S1 S3 -6.60(5) . . . . ?
Cu2 Cu3 S1 S3 83.77(7) . . . . ?
S2 Cu3 S1 S2 7.84(9) 2_656 . . . ?
I2 Cu3 S1 S2 149.65(5) . . . . ?
I3 Cu3 S1 S2 -101.42(6) . . . . ?
N11 Cu3 S1 S2 -174.92(13) . . . . ?
Cu1 Cu3 S1 S2 -46.36(5) . . . . ?
S3 Cu3 S1 S2 -39.76(5) . . . . ?
Cu2 Cu3 S1 S2 44.01(5) . . . . ?
S2 Cu3 S1 Cu2 24.85(4) 2_656 . . 2_656 ?
I2 Cu3 S1 Cu2 166.66(5) . . . 2_656 ?
I3 Cu3 S1 Cu2 -84.40(3) . . . 2_656 ?
N11 Cu3 S1 Cu2 -157.90(11) . . . 2_656 ?
Cu1 Cu3 S1 Cu2 -29.34(6) . . . 2_656 ?
S3 Cu3 S1 Cu2 -22.74(3) . . . 2_656 ?
Cu2 Cu3 S1 Cu2 61.03(7) . . . 2_656 ?
S2 Cu3 S1 Cu1 -17.41(5) 2_656 . . 2_656 ?
I2 Cu3 S1 Cu1 124.41(4) . . . 2_656 ?
I3 Cu3 S1 Cu1 -126.66(3) . . . 2_656 ?
N11 Cu3 S1 Cu1 159.84(11) . . . 2_656 ?
Cu1 Cu3 S1 Cu1 -71.60(6) . . . 2_656 ?
S3 Cu3 S1 Cu1 -65.00(3) . . . 2_656 ?
Cu2 Cu3 S1 Cu1 18.77(6) . . . 2_656 ?
S2 Cu3 S1 S1 4.66(6) 2_656 . . 2_656 ?
I2 Cu3 S1 S1 146.47(4) . . . 2_656 ?
I3 Cu3 S1 S1 -104.59(3) . . . 2_656 ?
N11 Cu3 S1 S1 -178.09(12) . . . 2_656 ?
Cu1 Cu3 S1 S1 -49.53(4) . . . 2_656 ?
S3 Cu3 S1 S1 -42.93(3) . . . 2_656 ?
Cu2 Cu3 S1 S1 40.84(5) . . . 2_656 ?
S3 Cu2 S1 C11 138.0(2) 2_656 . . . ?
S2 Cu2 S1 C11 -115.2(2) . . . . ?
I3 Cu2 S1 C11 12.8(2) 1_455 . . . ?
Cu1 Cu2 S1 C11 -106.1(2) . . . . ?
N21 Cu2 S1 C11 -62.7(2) . . . . ?
Cu1 Cu2 S1 C11 163.2(2) 2_656 . . . ?
Cu3 Cu2 S1 C11 143.5(2) . . . . ?
S1 Cu2 S1 C11 -167.7(2) 2_656 . . . ?
S2 Cu2 S1 C11 163.6(2) 2_656 . . . ?
Cu2 Cu2 S1 C11 -167.7(2) 2_656 . . . ?
S3 Cu2 S1 Cu1 -115.85(5) 2_656 . . . ?
S2 Cu2 S1 Cu1 -9.11(5) . . . . ?
I3 Cu2 S1 Cu1 118.96(4) 1_455 . . . ?
N21 Cu2 S1 Cu1 43.40(9) . . . . ?
Cu1 Cu2 S1 Cu1 -90.62(4) 2_656 . . . ?
Cu3 Cu2 S1 Cu1 -110.33(8) . . . . ?
S1 Cu2 S1 Cu1 -61.58(3) 2_656 . . . ?
S2 Cu2 S1 Cu1 -90.25(4) 2_656 . . . ?
Cu2 Cu2 S1 Cu1 -61.58(3) 2_656 . . . ?
S3 Cu2 S1 Cu3 -5.52(8) 2_656 . . . ?
S2 Cu2 S1 Cu3 101.22(8) . . . . ?
I3 Cu2 S1 Cu3 -130.71(6) 1_455 . . . ?
Cu1 Cu2 S1 Cu3 110.33(8) . . . . ?
N21 Cu2 S1 Cu3 153.73(10) . . . . ?
Cu1 Cu2 S1 Cu3 19.71(7) 2_656 . . . ?
S1 Cu2 S1 Cu3 48.75(6) 2_656 . . . ?
S2 Cu2 S1 Cu3 20.08(5) 2_656 . . . ?
Cu2 Cu2 S1 Cu3 48.75(6) 2_656 . . . ?
S3 Cu2 S1 S2 -25.60(5) 2_656 . . 2_656 ?
S2 Cu2 S1 S2 81.15(5) . . . 2_656 ?
I3 Cu2 S1 S2 -150.79(3) 1_455 . . 2_656 ?
Cu1 Cu2 S1 S2 90.25(4) . . . 2_656 ?
N21 Cu2 S1 S2 133.65(9) . . . 2_656 ?
Cu1 Cu2 S1 S2 -0.37(3) 2_656 . . 2_656 ?
Cu3 Cu2 S1 S2 -20.08(5) . . . 2_656 ?
S1 Cu2 S1 S2 28.67(3) 2_656 . . 2_656 ?
Cu2 Cu2 S1 S2 28.67(3) 2_656 . . 2_656 ?
S3 Cu2 S1 S3 -83.66(5) 2_656 . . . ?
S2 Cu2 S1 S3 23.08(5) . . . . ?
I3 Cu2 S1 S3 151.14(3) 1_455 . . . ?
Cu1 Cu2 S1 S3 32.19(3) . . . . ?
N21 Cu2 S1 S3 75.58(9) . . . . ?
Cu1 Cu2 S1 S3 -58.43(3) 2_656 . . . ?
Cu3 Cu2 S1 S3 -78.14(7) . . . . ?
S1 Cu2 S1 S3 -29.39(2) 2_656 . . . ?
S2 Cu2 S1 S3 -58.06(4) 2_656 . . . ?
Cu2 Cu2 S1 S3 -29.39(2) 2_656 . . . ?
S3 Cu2 S1 S2 -106.75(6) 2_656 . . . ?
I3 Cu2 S1 S2 128.06(5) 1_455 . . . ?
Cu1 Cu2 S1 S2 9.11(5) . . . . ?
N21 Cu2 S1 S2 52.50(9) . . . . ?
Cu1 Cu2 S1 S2 -81.51(4) 2_656 . . . ?
Cu3 Cu2 S1 S2 -101.22(8) . . . . ?
S1 Cu2 S1 S2 -52.47(4) 2_656 . . . ?
S2 Cu2 S1 S2 -81.15(5) 2_656 . . . ?
Cu2 Cu2 S1 S2 -52.47(4) 2_656 . . . ?
S3 Cu2 S1 Cu2 -54.27(4) 2_656 . . 2_656 ?
S2 Cu2 S1 Cu2 52.47(4) . . . 2_656 ?
I3 Cu2 S1 Cu2 -179.46(3) 1_455 . . 2_656 ?
Cu1 Cu2 S1 Cu2 61.58(3) . . . 2_656 ?
N21 Cu2 S1 Cu2 104.98(9) . . . 2_656 ?
Cu1 Cu2 S1 Cu2 -29.040(18) 2_656 . . 2_656 ?
Cu3 Cu2 S1 Cu2 -48.75(6) . . . 2_656 ?
S1 Cu2 S1 Cu2 0.0 2_656 . . 2_656 ?
S2 Cu2 S1 Cu2 -28.67(3) 2_656 . . 2_656 ?
S3 Cu2 S1 Cu1 -25.23(4) 2_656 . . 2_656 ?
S2 Cu2 S1 Cu1 81.51(4) . . . 2_656 ?
I3 Cu2 S1 Cu1 -150.42(3) 1_455 . . 2_656 ?
Cu1 Cu2 S1 Cu1 90.62(4) . . . 2_656 ?
N21 Cu2 S1 Cu1 134.02(9) . . . 2_656 ?
Cu3 Cu2 S1 Cu1 -19.71(7) . . . 2_656 ?
S1 Cu2 S1 Cu1 29.040(18) 2_656 . . 2_656 ?
S2 Cu2 S1 Cu1 0.37(3) 2_656 . . 2_656 ?
Cu2 Cu2 S1 Cu1 29.040(19) 2_656 . . 2_656 ?
S3 Cu2 S1 S1 -54.27(4) 2_656 . . 2_656 ?
S2 Cu2 S1 S1 52.47(4) . . . 2_656 ?
I3 Cu2 S1 S1 -179.46(3) 1_455 . . 2_656 ?
Cu1 Cu2 S1 S1 61.58(3) . . . 2_656 ?
N21 Cu2 S1 S1 104.98(9) . . . 2_656 ?
Cu1 Cu2 S1 S1 -29.040(18) 2_656 . . 2_656 ?
Cu3 Cu2 S1 S1 -48.75(6) . . . 2_656 ?
S2 Cu2 S1 S1 -28.67(3) 2_656 . . 2_656 ?
Cu2 Cu2 S1 S1 0.0 2_656 . . 2_656 ?
S3 Cu2 S2 C21 -150.24(19) 2_656 . . . ?
S1 Cu2 S2 C21 109.29(19) . . . . ?
I3 Cu2 S2 C21 -8.8(2) 1_455 . . . ?
Cu1 Cu2 S2 C21 101.17(19) . . . . ?
N21 Cu2 S2 C21 1.7(2) . . . . ?
Cu1 Cu2 S2 C21 -167.18(19) 2_656 . . . ?
Cu3 Cu2 S2 C21 135.87(18) . . . . ?
S1 Cu2 S2 C21 -167.7(2) 2_656 . . . ?
S2 Cu2 S2 C21 160.53(19) 2_656 . . . ?
Cu2 Cu2 S2 C21 160.53(19) 2_656 . . . ?
S3 Cu2 S2 Cu3 -12.42(9) 2_656 . . 2_656 ?
S1 Cu2 S2 Cu3 -112.89(7) . . . 2_656 ?
I3 Cu2 S2 Cu3 129.00(6) 1_455 . . 2_656 ?
Cu1 Cu2 S2 Cu3 -121.01(8) . . . 2_656 ?
N21 Cu2 S2 Cu3 139.49(13) . . . 2_656 ?
Cu1 Cu2 S2 Cu3 -29.36(6) 2_656 . . 2_656 ?
Cu3 Cu2 S2 Cu3 -86.31(7) . . . 2_656 ?
S1 Cu2 S2 Cu3 -29.85(5) 2_656 . . 2_656 ?
S2 Cu2 S2 Cu3 -61.65(6) 2_656 . . 2_656 ?
Cu2 Cu2 S2 Cu3 -61.65(6) 2_656 . . 2_656 ?
S3 Cu2 S2 Cu1 108.59(5) 2_656 . . . ?
S1 Cu2 S2 Cu1 8.13(4) . . . . ?
I3 Cu2 S2 Cu1 -109.98(5) 1_455 . . . ?
N21 Cu2 S2 Cu1 -99.49(11) . . . . ?
Cu1 Cu2 S2 Cu1 91.65(3) 2_656 . . . ?
Cu3 Cu2 S2 Cu1 34.70(4) . . . . ?
S1 Cu2 S2 Cu1 91.16(4) 2_656 . . . ?
S2 Cu2 S2 Cu1 59.36(3) 2_656 . . . ?
Cu2 Cu2 S2 Cu1 59.36(3) 2_656 . . . ?
S3 Cu2 S2 S3 76.61(6) 2_656 . . . ?
S1 Cu2 S2 S3 -23.85(5) . . . . ?
I3 Cu2 S2 S3 -141.96(4) 1_455 . . . ?
Cu1 Cu2 S2 S3 -31.98(3) . . . . ?
N21 Cu2 S2 S3 -131.47(11) . . . . ?
Cu1 Cu2 S2 S3 59.67(3) 2_656 . . . ?
Cu3 Cu2 S2 S3 2.72(4) . . . . ?
S1 Cu2 S2 S3 59.18(4) 2_656 . . . ?
S2 Cu2 S2 S3 27.38(3) 2_656 . . . ?
Cu2 Cu2 S2 S3 27.38(3) 2_656 . . . ?
S3 Cu2 S2 S1 17.43(6) 2_656 . . 2_656 ?
S1 Cu2 S2 S1 -83.04(5) . . . 2_656 ?
I3 Cu2 S2 S1 158.85(4) 1_455 . . 2_656 ?
Cu1 Cu2 S2 S1 -91.16(4) . . . 2_656 ?
N21 Cu2 S2 S1 169.34(11) . . . 2_656 ?
Cu1 Cu2 S2 S1 0.49(3) 2_656 . . 2_656 ?
Cu3 Cu2 S2 S1 -56.46(4) . . . 2_656 ?
S2 Cu2 S2 S1 -31.80(3) 2_656 . . 2_656 ?
Cu2 Cu2 S2 S1 -31.80(3) 2_656 . . 2_656 ?
S3 Cu2 S2 S1 100.47(6) 2_656 . . . ?
I3 Cu2 S2 S1 -118.11(6) 1_455 . . . ?
Cu1 Cu2 S2 S1 -8.13(4) . . . . ?
N21 Cu2 S2 S1 -107.62(11) . . . . ?
Cu1 Cu2 S2 S1 83.53(4) 2_656 . . . ?
Cu3 Cu2 S2 S1 26.58(3) . . . . ?
S1 Cu2 S2 S1 83.04(5) 2_656 . . . ?
S2 Cu2 S2 S1 51.24(4) 2_656 . . . ?
Cu2 Cu2 S2 S1 51.24(4) 2_656 . . . ?
S3 Cu2 S2 Cu1 16.94(4) 2_656 . . 2_656 ?
S1 Cu2 S2 Cu1 -83.53(4) . . . 2_656 ?
I3 Cu2 S2 Cu1 158.36(5) 1_455 . . 2_656 ?
Cu1 Cu2 S2 Cu1 -91.65(3) . . . 2_656 ?
N21 Cu2 S2 Cu1 168.85(10) . . . 2_656 ?
Cu3 Cu2 S2 Cu1 -56.95(2) . . . 2_656 ?
S1 Cu2 S2 Cu1 -0.49(3) 2_656 . . 2_656 ?
S2 Cu2 S2 Cu1 -32.290(17) 2_656 . . 2_656 ?
Cu2 Cu2 S2 Cu1 -32.290(17) 2_656 . . 2_656 ?
S3 Cu2 S2 Cu2 49.23(5) 2_656 . . 2_656 ?
S1 Cu2 S2 Cu2 -51.24(4) . . . 2_656 ?
I3 Cu2 S2 Cu2 -169.35(4) 1_455 . . 2_656 ?
Cu1 Cu2 S2 Cu2 -59.36(3) . . . 2_656 ?
N21 Cu2 S2 Cu2 -158.86(11) . . . 2_656 ?
Cu1 Cu2 S2 Cu2 32.290(18) 2_656 . . 2_656 ?
Cu3 Cu2 S2 Cu2 -24.66(3) . . . 2_656 ?
S1 Cu2 S2 Cu2 31.80(3) 2_656 . . 2_656 ?
S2 Cu2 S2 Cu2 0.0 2_656 . . 2_656 ?
S3 Cu2 S2 S2 49.23(5) 2_656 . . 2_656 ?
S1 Cu2 S2 S2 -51.24(4) . . . 2_656 ?
I3 Cu2 S2 S2 -169.35(4) 1_455 . . 2_656 ?
Cu1 Cu2 S2 S2 -59.36(3) . . . 2_656 ?
N21 Cu2 S2 S2 -158.86(11) . . . 2_656 ?
Cu1 Cu2 S2 S2 32.290(18) 2_656 . . 2_656 ?
Cu3 Cu2 S2 S2 -24.66(3) . . . 2_656 ?
S1 Cu2 S2 S2 31.80(3) 2_656 . . 2_656 ?
Cu2 Cu2 S2 S2 0.0 2_656 . . 2_656 ?
S3 Cu1 S2 C21 127.15(19) . . . . ?
S1 Cu1 S2 C21 -120.13(19) . . . . ?
I1 Cu1 S2 C21 5.37(19) . . . . ?
Cu2 Cu1 S2 C21 -111.11(19) . . . . ?
N31 Cu1 S2 C21 76.7(2) . . . . ?
Cu3 Cu1 S2 C21 -152.86(19) . . . . ?
Cu2 Cu1 S2 C21 152.32(19) 2_656 . . . ?
S2 Cu1 S2 C21 -177.44(19) 2_656 . . . ?
S1 Cu1 S2 C21 152.0(2) 2_656 . . . ?
Cu1 Cu1 S2 C21 -177.44(19) 2_656 . . . ?
S3 Cu1 S2 Cu3 -4.40(8) . . . 2_656 ?
S1 Cu1 S2 Cu3 108.32(7) . . . 2_656 ?
I1 Cu1 S2 Cu3 -126.18(6) . . . 2_656 ?
Cu2 Cu1 S2 Cu3 117.34(8) . . . 2_656 ?
N31 Cu1 S2 Cu3 -54.82(10) . . . 2_656 ?
Cu3 Cu1 S2 Cu3 75.58(7) . . . 2_656 ?
Cu2 Cu1 S2 Cu3 20.76(6) 2_656 . . 2_656 ?
S2 Cu1 S2 Cu3 51.01(6) 2_656 . . 2_656 ?
S1 Cu1 S2 Cu3 20.40(5) 2_656 . . 2_656 ?
Cu1 Cu1 S2 Cu3 51.01(6) 2_656 . . 2_656 ?
S3 Cu1 S2 Cu2 -121.74(5) . . . . ?
S1 Cu1 S2 Cu2 -9.02(5) . . . . ?
I1 Cu1 S2 Cu2 116.49(4) . . . . ?
N31 Cu1 S2 Cu2 -172.16(9) . . . . ?
Cu3 Cu1 S2 Cu2 -41.75(4) . . . . ?
Cu2 Cu1 S2 Cu2 -96.57(3) 2_656 . . . ?
S2 Cu1 S2 Cu2 -66.32(3) 2_656 . . . ?
S1 Cu1 S2 Cu2 -96.94(4) 2_656 . . . ?
Cu1 Cu1 S2 Cu2 -66.32(3) 2_656 . . . ?
S1 Cu1 S2 S3 112.72(6) . . . . ?
I1 Cu1 S2 S3 -121.78(5) . . . . ?
Cu2 Cu1 S2 S3 121.74(5) . . . . ?
N31 Cu1 S2 S3 -50.42(9) . . . . ?
Cu3 Cu1 S2 S3 79.98(4) . . . . ?
Cu2 Cu1 S2 S3 25.16(4) 2_656 . . . ?
S2 Cu1 S2 S3 55.41(4) 2_656 . . . ?
S1 Cu1 S2 S3 24.80(5) 2_656 . . . ?
Cu1 Cu1 S2 S3 55.41(4) 2_656 . . . ?
S3 Cu1 S2 S1 -24.80(5) . . . 2_656 ?
S1 Cu1 S2 S1 87.92(5) . . . 2_656 ?
I1 Cu1 S2 S1 -146.58(3) . . . 2_656 ?
Cu2 Cu1 S2 S1 96.94(4) . . . 2_656 ?
N31 Cu1 S2 S1 -75.22(9) . . . 2_656 ?
Cu3 Cu1 S2 S1 55.18(4) . . . 2_656 ?
Cu2 Cu1 S2 S1 0.36(3) 2_656 . . 2_656 ?
S2 Cu1 S2 S1 30.61(3) 2_656 . . 2_656 ?
Cu1 Cu1 S2 S1 30.61(3) 2_656 . . 2_656 ?
S3 Cu1 S2 S1 -112.72(6) . . . . ?
I1 Cu1 S2 S1 125.50(5) . . . . ?
Cu2 Cu1 S2 S1 9.02(5) . . . . ?
N31 Cu1 S2 S1 -163.14(9) . . . . ?
Cu3 Cu1 S2 S1 -32.74(4) . . . . ?
Cu2 Cu1 S2 S1 -87.55(4) 2_656 . . . ?
S2 Cu1 S2 S1 -57.31(4) 2_656 . . . ?
S1 Cu1 S2 S1 -87.92(5) 2_656 . . . ?
Cu1 Cu1 S2 S1 -57.31(4) 2_656 . . . ?
S3 Cu1 S2 Cu1 -55.41(4) . . . 2_656 ?
S1 Cu1 S2 Cu1 57.31(4) . . . 2_656 ?
I1 Cu1 S2 Cu1 -177.19(3) . . . 2_656 ?
Cu2 Cu1 S2 Cu1 66.32(3) . . . 2_656 ?
N31 Cu1 S2 Cu1 -105.84(9) . . . 2_656 ?
Cu3 Cu1 S2 Cu1 24.57(3) . . . 2_656 ?
Cu2 Cu1 S2 Cu1 -30.248(18) 2_656 . . 2_656 ?
S2 Cu1 S2 Cu1 0.0 2_656 . . 2_656 ?
S1 Cu1 S2 Cu1 -30.61(3) 2_656 . . 2_656 ?
S3 Cu1 S2 Cu2 -25.16(4) . . . 2_656 ?
S1 Cu1 S2 Cu2 87.55(4) . . . 2_656 ?
I1 Cu1 S2 Cu2 -146.94(3) . . . 2_656 ?
Cu2 Cu1 S2 Cu2 96.57(4) . . . 2_656 ?
N31 Cu1 S2 Cu2 -75.59(9) . . . 2_656 ?
Cu3 Cu1 S2 Cu2 54.82(3) . . . 2_656 ?
S2 Cu1 S2 Cu2 30.248(18) 2_656 . . 2_656 ?
S1 Cu1 S2 Cu2 -0.36(3) 2_656 . . 2_656 ?
Cu1 Cu1 S2 Cu2 30.248(18) 2_656 . . 2_656 ?
S3 Cu1 S2 S2 -55.41(4) . . . 2_656 ?
S1 Cu1 S2 S2 57.31(4) . . . 2_656 ?
I1 Cu1 S2 S2 -177.19(3) . . . 2_656 ?
Cu2 Cu1 S2 S2 66.32(3) . . . 2_656 ?
N31 Cu1 S2 S2 -105.84(9) . . . 2_656 ?
Cu3 Cu1 S2 S2 24.57(3) . . . 2_656 ?
Cu2 Cu1 S2 S2 -30.248(18) 2_656 . . 2_656 ?
S1 Cu1 S2 S2 -30.61(3) 2_656 . . 2_656 ?
Cu1 Cu1 S2 S2 0.0 2_656 . . 2_656 ?
C11 S1 S2 C21 -6.1(3) . . . . ?
Cu1 S1 S2 C21 74.4(2) . . . . ?
Cu3 S1 S2 C21 163.2(2) . . . . ?
Cu2 S1 S2 C21 -92.1(2) . . . . ?
S2 S1 S2 C21 167.8(2) 2_656 . . . ?
S3 S1 S2 C21 115.4(2) . . . . ?
Cu2 S1 S2 C21 147.4(2) 2_656 . . . ?
Cu1 S1 S2 C21 -170.5(2) 2_656 . . . ?
S1 S1 S2 C21 167.8(2) 2_656 . . . ?
C11 S1 S2 Cu3 -178.6(2) . . . 2_656 ?
Cu1 S1 S2 Cu3 -98.16(8) . . . 2_656 ?
Cu3 S1 S2 Cu3 -9.31(11) . . . 2_656 ?
Cu2 S1 S2 Cu3 95.32(8) . . . 2_656 ?
S2 S1 S2 Cu3 -4.78(6) 2_656 . . 2_656 ?
S3 S1 S2 Cu3 -57.18(7) . . . 2_656 ?
Cu2 S1 S2 Cu3 -25.17(6) 2_656 . . 2_656 ?
Cu1 S1 S2 Cu3 16.96(6) 2_656 . . 2_656 ?
S1 S1 S2 Cu3 -4.78(6) 2_656 . . 2_656 ?
C11 S1 S2 Cu2 86.1(2) . . . . ?
Cu1 S1 S2 Cu2 166.52(7) . . . . ?
Cu3 S1 S2 Cu2 -104.63(8) . . . . ?
S2 S1 S2 Cu2 -100.10(5) 2_656 . . . ?
S3 S1 S2 Cu2 -152.50(6) . . . . ?
Cu2 S1 S2 Cu2 -120.49(5) 2_656 . . . ?
Cu1 S1 S2 Cu2 -78.37(4) 2_656 . . . ?
S1 S1 S2 Cu2 -100.10(5) 2_656 . . . ?
C11 S1 S2 Cu1 -80.5(2) . . . . ?
Cu3 S1 S2 Cu1 88.85(7) . . . . ?
Cu2 S1 S2 Cu1 -166.52(7) . . . . ?
S2 S1 S2 Cu1 93.38(5) 2_656 . . . ?
S3 S1 S2 Cu1 40.98(4) . . . . ?
Cu2 S1 S2 Cu1 72.99(4) 2_656 . . . ?
Cu1 S1 S2 Cu1 115.12(5) 2_656 . . . ?
S1 S1 S2 Cu1 93.38(5) 2_656 . . . ?
C11 S1 S2 S3 -121.4(2) . . . . ?
Cu1 S1 S2 S3 -40.98(4) . . . . ?
Cu3 S1 S2 S3 47.87(6) . . . . ?
Cu2 S1 S2 S3 152.50(6) . . . . ?
S2 S1 S2 S3 52.40(3) 2_656 . . . ?
Cu2 S1 S2 S3 32.01(3) 2_656 . . . ?
Cu1 S1 S2 S3 74.13(3) 2_656 . . . ?
S1 S1 S2 S3 52.40(3) 2_656 . . . ?
C11 S1 S2 S1 -173.8(2) . . . 2_656 ?
Cu1 S1 S2 S1 -93.38(5) . . . 2_656 ?
Cu3 S1 S2 S1 -4.53(5) . . . 2_656 ?
Cu2 S1 S2 S1 100.10(5) . . . 2_656 ?
S2 S1 S2 S1 0.0 2_656 . . 2_656 ?
S3 S1 S2 S1 -52.40(3) . . . 2_656 ?
Cu2 S1 S2 S1 -20.39(2) 2_656 . . 2_656 ?
Cu1 S1 S2 S1 21.74(2) 2_656 . . 2_656 ?
C11 S1 S2 Cu1 164.4(2) . . . 2_656 ?
Cu1 S1 S2 Cu1 -115.12(5) . . . 2_656 ?
Cu3 S1 S2 Cu1 -26.27(6) . . . 2_656 ?
Cu2 S1 S2 Cu1 78.37(4) . . . 2_656 ?
S2 S1 S2 Cu1 -21.74(2) 2_656 . . 2_656 ?
S3 S1 S2 Cu1 -74.13(3) . . . 2_656 ?
Cu2 S1 S2 Cu1 -42.124(18) 2_656 . . 2_656 ?
S1 S1 S2 Cu1 -21.74(2) 2_656 . . 2_656 ?
C11 S1 S2 Cu2 -153.5(2) . . . 2_656 ?
Cu1 S1 S2 Cu2 -72.99(4) . . . 2_656 ?
Cu3 S1 S2 Cu2 15.86(6) . . . 2_656 ?
Cu2 S1 S2 Cu2 120.49(5) . . . 2_656 ?
S2 S1 S2 Cu2 20.39(2) 2_656 . . 2_656 ?
S3 S1 S2 Cu2 -32.01(3) . . . 2_656 ?
Cu1 S1 S2 Cu2 42.124(19) 2_656 . . 2_656 ?
S1 S1 S2 Cu2 20.39(2) 2_656 . . 2_656 ?
C11 S1 S2 S2 -173.8(2) . . . 2_656 ?
Cu1 S1 S2 S2 -93.38(5) . . . 2_656 ?
Cu3 S1 S2 S2 -4.53(5) . . . 2_656 ?
Cu2 S1 S2 S2 100.10(5) . . . 2_656 ?
S3 S1 S2 S2 -52.40(3) . . . 2_656 ?
Cu2 S1 S2 S2 -20.39(2) 2_656 . . 2_656 ?
Cu1 S1 S2 S2 21.74(2) 2_656 . . 2_656 ?
S1 S1 S2 S2 0.0 2_656 . . 2_656 ?
S1 Cu1 S3 C31 -169.27(19) . . . . ?
S2 Cu1 S3 C31 -62.70(19) . . . . ?
I1 Cu1 S3 C31 48.44(19) . . . . ?
Cu2 Cu1 S3 C31 -108.44(19) . . . . ?
N31 Cu1 S3 C31 6.1(2) . . . . ?
Cu3 Cu1 S3 C31 -175.59(19) . . . . ?
Cu2 Cu1 S3 C31 -129.6(2) 2_656 . . . ?
S2 Cu1 S3 C31 -152.23(19) 2_656 . . . ?
S1 Cu1 S3 C31 -88.61(19) 2_656 . . . ?
Cu1 Cu1 S3 C31 -117.21(19) 2_656 . . . ?
S1 Cu1 S3 Cu2 -39.63(9) . . . 2_656 ?
S2 Cu1 S3 Cu2 66.95(8) . . . 2_656 ?
I1 Cu1 S3 Cu2 178.09(5) . . . 2_656 ?
Cu2 Cu1 S3 Cu2 21.20(10) . . . 2_656 ?
N31 Cu1 S3 Cu2 135.76(14) . . . 2_656 ?
Cu3 Cu1 S3 Cu2 -45.95(7) . . . 2_656 ?
S2 Cu1 S3 Cu2 -22.58(5) 2_656 . . 2_656 ?
S1 Cu1 S3 Cu2 41.03(6) 2_656 . . 2_656 ?
Cu1 Cu1 S3 Cu2 12.44(6) 2_656 . . 2_656 ?
S1 Cu1 S3 S1 -80.66(6) . . . 2_656 ?
S2 Cu1 S3 S1 25.92(5) . . . 2_656 ?
I1 Cu1 S3 S1 137.06(4) . . . 2_656 ?
Cu2 Cu1 S3 S1 -19.83(6) . . . 2_656 ?
N31 Cu1 S3 S1 94.73(12) . . . 2_656 ?
Cu3 Cu1 S3 S1 -86.98(4) . . . 2_656 ?
Cu2 Cu1 S3 S1 -41.03(6) 2_656 . . 2_656 ?
S2 Cu1 S3 S1 -63.61(4) 2_656 . . 2_656 ?
Cu1 Cu1 S3 S1 -28.59(3) 2_656 . . 2_656 ?
S1 Cu1 S3 S2 -17.05(6) . . . 2_656 ?
S2 Cu1 S3 S2 89.53(5) . . . 2_656 ?
I1 Cu1 S3 S2 -159.33(4) . . . 2_656 ?
Cu2 Cu1 S3 S2 43.79(5) . . . 2_656 ?
N31 Cu1 S3 S2 158.34(12) . . . 2_656 ?
Cu3 Cu1 S3 S2 -23.37(3) . . . 2_656 ?
Cu2 Cu1 S3 S2 22.58(5) 2_656 . . 2_656 ?
S1 Cu1 S3 S2 63.61(4) 2_656 . . 2_656 ?
Cu1 Cu1 S3 S2 35.02(3) 2_656 . . 2_656 ?
S1 Cu1 S3 S2 -106.57(6) . . . . ?
I1 Cu1 S3 S2 111.14(5) . . . . ?
Cu2 Cu1 S3 S2 -45.74(4) . . . . ?
N31 Cu1 S3 S2 68.81(12) . . . . ?
Cu3 Cu1 S3 S2 -112.89(4) . . . . ?
Cu2 Cu1 S3 S2 -66.95(8) 2_656 . . . ?
S2 Cu1 S3 S2 -89.53(5) 2_656 . . . ?
S1 Cu1 S3 S2 -25.92(5) 2_656 . . . ?
Cu1 Cu1 S3 S2 -54.51(4) 2_656 . . . ?
S2 Cu1 S3 S1 106.57(6) . . . . ?
I1 Cu1 S3 S1 -142.28(7) . . . . ?
Cu2 Cu1 S3 S1 60.83(5) . . . . ?
N31 Cu1 S3 S1 175.38(12) . . . . ?
Cu3 Cu1 S3 S1 -6.32(5) . . . . ?
Cu2 Cu1 S3 S1 39.63(9) 2_656 . . . ?
S2 Cu1 S3 S1 17.05(6) 2_656 . . . ?
S1 Cu1 S3 S1 80.66(6) 2_656 . . . ?
Cu1 Cu1 S3 S1 52.07(5) 2_656 . . . ?
S1 Cu1 S3 Cu3 6.32(5) . . . . ?
S2 Cu1 S3 Cu3 112.89(4) . . . . ?
I1 Cu1 S3 Cu3 -135.97(4) . . . . ?
Cu2 Cu1 S3 Cu3 67.15(4) . . . . ?
N31 Cu1 S3 Cu3 -178.30(12) . . . . ?
Cu2 Cu1 S3 Cu3 45.95(7) 2_656 . . . ?
S2 Cu1 S3 Cu3 23.37(3) 2_656 . . . ?
S1 Cu1 S3 Cu3 86.98(4) 2_656 . . . ?
Cu1 Cu1 S3 Cu3 58.39(2) 2_656 . . . ?
C21 S2 S3 C31 52.4(3) . . . . ?
Cu3 S2 S3 C31 -62.11(17) 2_656 . . . ?
Cu2 S2 S3 C31 177.94(17) . . . . ?
Cu1 S2 S3 C31 121.57(17) . . . . ?
S1 S2 S3 C31 -87.81(17) 2_656 . . . ?
S1 S2 S3 C31 160.25(17) . . . . ?
Cu1 S2 S3 C31 -122.39(17) 2_656 . . . ?
Cu2 S2 S3 C31 -108.57(17) 2_656 . . . ?
S2 S2 S3 C31 -145.62(17) 2_656 . . . ?
C21 S2 S3 Cu2 161.0(2) . . . 2_656 ?
Cu3 S2 S3 Cu2 46.47(6) 2_656 . . 2_656 ?
Cu2 S2 S3 Cu2 -73.48(6) . . . 2_656 ?
Cu1 S2 S3 Cu2 -129.86(7) . . . 2_656 ?
S1 S2 S3 Cu2 20.76(4) 2_656 . . 2_656 ?
S1 S2 S3 Cu2 -91.17(5) . . . 2_656 ?
Cu1 S2 S3 Cu2 -13.82(4) 2_656 . . 2_656 ?
S2 S2 S3 Cu2 -37.04(4) 2_656 . . 2_656 ?
C21 S2 S3 Cu1 -69.2(2) . . . . ?
Cu3 S2 S3 Cu1 176.32(7) 2_656 . . . ?
Cu2 S2 S3 Cu1 56.38(5) . . . . ?
S1 S2 S3 Cu1 150.62(6) 2_656 . . . ?
S1 S2 S3 Cu1 38.68(4) . . . . ?
Cu1 S2 S3 Cu1 116.04(5) 2_656 . . . ?
Cu2 S2 S3 Cu1 129.86(7) 2_656 . . . ?
S2 S2 S3 Cu1 92.81(5) 2_656 . . . ?
C21 S2 S3 S1 140.2(2) . . . 2_656 ?
Cu3 S2 S3 S1 25.70(4) 2_656 . . 2_656 ?
Cu2 S2 S3 S1 -94.25(5) . . . 2_656 ?
Cu1 S2 S3 S1 -150.62(6) . . . 2_656 ?
S1 S2 S3 S1 -111.94(4) . . . 2_656 ?
Cu1 S2 S3 S1 -34.58(3) 2_656 . . 2_656 ?
Cu2 S2 S3 S1 -20.76(4) 2_656 . . 2_656 ?
S2 S2 S3 S1 -57.81(3) 2_656 . . 2_656 ?
C21 S2 S3 S2 -162.0(2) . . . 2_656 ?
Cu3 S2 S3 S2 83.51(4) 2_656 . . 2_656 ?
Cu2 S2 S3 S2 -36.44(4) . . . 2_656 ?
Cu1 S2 S3 S2 -92.81(5) . . . 2_656 ?
S1 S2 S3 S2 57.81(3) 2_656 . . 2_656 ?
S1 S2 S3 S2 -54.13(3) . . . 2_656 ?
Cu1 S2 S3 S2 23.23(2) 2_656 . . 2_656 ?
Cu2 S2 S3 S2 37.04(4) 2_656 . . 2_656 ?
C21 S2 S3 S1 -107.9(2) . . . . ?
Cu3 S2 S3 S1 137.64(5) 2_656 . . . ?
Cu2 S2 S3 S1 17.69(4) . . . . ?
Cu1 S2 S3 S1 -38.68(4) . . . . ?
S1 S2 S3 S1 111.94(4) 2_656 . . . ?
Cu1 S2 S3 S1 77.36(3) 2_656 . . . ?
Cu2 S2 S3 S1 91.17(5) 2_656 . . . ?
S2 S2 S3 S1 54.13(3) 2_656 . . . ?
C21 S2 S3 Cu3 -128.3(2) . . . . ?
Cu3 S2 S3 Cu3 117.17(4) 2_656 . . . ?
Cu2 S2 S3 Cu3 -2.78(4) . . . . ?
Cu1 S2 S3 Cu3 -59.15(4) . . . . ?
S1 S2 S3 Cu3 91.47(4) 2_656 . . . ?
S1 S2 S3 Cu3 -20.47(3) . . . . ?
Cu1 S2 S3 Cu3 56.89(3) 2_656 . . . ?
Cu2 S2 S3 Cu3 70.71(4) 2_656 . . . ?
S2 S2 S3 Cu3 33.66(3) 2_656 . . . ?
C11 S1 S3 C31 78.2(4) . . . . ?
Cu1 S1 S3 C31 16.5(3) . . . . ?
Cu3 S1 S3 C31 -174.0(3) . . . . ?
Cu2 S1 S3 C31 -48.4(3) . . . . ?
S2 S1 S3 C31 -143.8(3) 2_656 . . . ?
S2 S1 S3 C31 -32.6(3) . . . . ?
Cu2 S1 S3 C31 -131.7(3) 2_656 . . . ?
Cu1 S1 S3 C31 -105.2(3) 2_656 . . . ?
S1 S1 S3 C31 -87.1(3) 2_656 . . . ?
C11 S1 S3 Cu2 -150.1(3) . . . 2_656 ?
Cu1 S1 S3 Cu2 148.30(8) . . . 2_656 ?
Cu3 S1 S3 Cu2 -42.25(5) . . . 2_656 ?
Cu2 S1 S3 Cu2 83.39(5) . . . 2_656 ?
S2 S1 S3 Cu2 -12.00(4) 2_656 . . 2_656 ?
S2 S1 S3 Cu2 99.12(5) . . . 2_656 ?
Cu1 S1 S3 Cu2 26.60(4) 2_656 . . 2_656 ?
S1 S1 S3 Cu2 44.64(4) 2_656 . . 2_656 ?
C11 S1 S3 Cu1 61.6(3) . . . . ?
Cu3 S1 S3 Cu1 169.45(8) . . . . ?
Cu2 S1 S3 Cu1 -64.91(6) . . . . ?
S2 S1 S3 Cu1 -160.30(7) 2_656 . . . ?
S2 S1 S3 Cu1 -49.18(5) . . . . ?
Cu2 S1 S3 Cu1 -148.30(8) 2_656 . . . ?
Cu1 S1 S3 Cu1 -121.70(6) 2_656 . . . ?
S1 S1 S3 Cu1 -103.66(7) 2_656 . . . ?
C11 S1 S3 S1 165.3(3) . . . 2_656 ?
Cu1 S1 S3 S1 103.66(7) . . . 2_656 ?
Cu3 S1 S3 S1 -86.90(4) . . . 2_656 ?
Cu2 S1 S3 S1 38.74(3) . . . 2_656 ?
S2 S1 S3 S1 -56.65(3) 2_656 . . 2_656 ?
S2 S1 S3 S1 54.47(3) . . . 2_656 ?
Cu2 S1 S3 S1 -44.64(4) 2_656 . . 2_656 ?
Cu1 S1 S3 S1 -18.05(2) 2_656 . . 2_656 ?
C11 S1 S3 S2 -138.1(3) . . . 2_656 ?
Cu1 S1 S3 S2 160.30(7) . . . 2_656 ?
Cu3 S1 S3 S2 -30.25(4) . . . 2_656 ?
Cu2 S1 S3 S2 95.39(4) . . . 2_656 ?
S2 S1 S3 S2 111.12(4) . . . 2_656 ?
Cu2 S1 S3 S2 12.00(4) 2_656 . . 2_656 ?
Cu1 S1 S3 S2 38.60(3) 2_656 . . 2_656 ?
S1 S1 S3 S2 56.65(3) 2_656 . . 2_656 ?
C11 S1 S3 S2 110.8(3) . . . . ?
Cu1 S1 S3 S2 49.18(5) . . . . ?
Cu3 S1 S3 S2 -141.37(5) . . . . ?
Cu2 S1 S3 S2 -15.73(3) . . . . ?
S2 S1 S3 S2 -111.12(4) 2_656 . . . ?
Cu2 S1 S3 S2 -99.12(5) 2_656 . . . ?
Cu1 S1 S3 S2 -72.52(3) 2_656 . . . ?
S1 S1 S3 S2 -54.47(3) 2_656 . . . ?
C11 S1 S3 Cu3 -107.8(3) . . . . ?
Cu1 S1 S3 Cu3 -169.45(8) . . . . ?
Cu2 S1 S3 Cu3 125.64(6) . . . . ?
S2 S1 S3 Cu3 30.25(4) 2_656 . . . ?
S2 S1 S3 Cu3 141.37(5) . . . . ?
Cu2 S1 S3 Cu3 42.25(5) 2_656 . . . ?
Cu1 S1 S3 Cu3 68.85(4) 2_656 . . . ?
S1 S1 S3 Cu3 86.90(4) 2_656 . . . ?
S2 Cu3 S3 C31 -87.6(17) 2_656 . . . ?
S1 Cu3 S3 C31 40.5(17) . . . . ?
I2 Cu3 S3 C31 142.1(17) . . . . ?
I3 Cu3 S3 C31 150.9(17) . . . . ?
N11 Cu3 S3 C31 75.9(17) . . . . ?
Cu1 Cu3 S3 C31 46.9(17) . . . . ?
Cu2 Cu3 S3 C31 8.8(17) . . . . ?
S2 Cu3 S3 Cu2 6.95(5) 2_656 . . 2_656 ?
S1 Cu3 S3 Cu2 135.07(6) . . . 2_656 ?
I2 Cu3 S3 Cu2 -123.3(2) . . . 2_656 ?
I3 Cu3 S3 Cu2 -114.48(4) . . . 2_656 ?
N11 Cu3 S3 Cu2 170.45(10) . . . 2_656 ?
Cu1 Cu3 S3 Cu2 141.54(6) . . . 2_656 ?
Cu2 Cu3 S3 Cu2 103.36(4) . . . 2_656 ?
S2 Cu3 S3 Cu1 -134.59(6) 2_656 . . . ?
S1 Cu3 S3 Cu1 -6.47(5) . . . . ?
I2 Cu3 S3 Cu1 95.1(2) . . . . ?
I3 Cu3 S3 Cu1 103.98(4) . . . . ?
N11 Cu3 S3 Cu1 28.91(10) . . . . ?
Cu2 Cu3 S3 Cu1 -38.18(3) . . . . ?
S2 Cu3 S3 S1 -33.67(5) 2_656 . . 2_656 ?
S1 Cu3 S3 S1 94.44(5) . . . 2_656 ?
I2 Cu3 S3 S1 -163.9(2) . . . 2_656 ?
I3 Cu3 S3 S1 -155.10(4) . . . 2_656 ?
N11 Cu3 S3 S1 129.82(9) . . . 2_656 ?
Cu1 Cu3 S3 S1 100.92(5) . . . 2_656 ?
Cu2 Cu3 S3 S1 62.73(3) . . . 2_656 ?
S1 Cu3 S3 S2 128.12(6) . . . 2_656 ?
I2 Cu3 S3 S2 -130.3(2) . . . 2_656 ?
I3 Cu3 S3 S2 -121.43(5) . . . 2_656 ?
N11 Cu3 S3 S2 163.50(10) . . . 2_656 ?
Cu1 Cu3 S3 S2 134.59(6) . . . 2_656 ?
Cu2 Cu3 S3 S2 96.41(5) . . . 2_656 ?
S2 Cu3 S3 S2 -94.81(5) 2_656 . . . ?
S1 Cu3 S3 S2 33.31(4) . . . . ?
I2 Cu3 S3 S2 134.9(2) . . . . ?
I3 Cu3 S3 S2 143.77(3) . . . . ?
N11 Cu3 S3 S2 68.69(9) . . . . ?
Cu1 Cu3 S3 S2 39.78(3) . . . . ?
Cu2 Cu3 S3 S2 1.60(2) . . . . ?
S2 Cu3 S3 S1 -128.12(6) 2_656 . . . ?
I2 Cu3 S3 S1 101.6(2) . . . . ?
I3 Cu3 S3 S1 110.45(4) . . . . ?
N11 Cu3 S3 S1 35.38(9) . . . . ?
Cu1 Cu3 S3 S1 6.47(5) . . . . ?
Cu2 Cu3 S3 S1 -31.71(4) . . . . ?
S2 Cu3 N11 C11 13.1(5) 2_656 . . . ?
S1 Cu3 N11 C11 5.2(3) . . . . ?
I2 Cu3 N11 C11 151.6(3) . . . . ?
I3 Cu3 N11 C11 -101.7(3) . . . . ?
Cu1 Cu3 N11 C11 -20.8(3) . . . . ?
S3 Cu3 N11 C11 -36.8(3) . . . . ?
Cu2 Cu3 N11 C11 23.4(3) . . . . ?
S2 Cu3 N11 C15 -179.4(9) 2_656 . . . ?
S1 Cu3 N11 C15 172.7(11) . . . . ?
I2 Cu3 N11 C15 -40.9(11) . . . . ?
I3 Cu3 N11 C15 65.8(11) . . . . ?
Cu1 Cu3 N11 C15 146.7(11) . . . . ?
S3 Cu3 N11 C15 130.7(11) . . . . ?
Cu2 Cu3 N11 C15 -169.1(11) . . . . ?
S3 Cu2 N21 C25 -129.5(11) 2_656 . . . ?
S2 Cu2 N21 C25 177.9(12) . . . . ?
S1 Cu2 N21 C25 88.5(11) . . . . ?
I3 Cu2 N21 C25 -11.6(11) 1_455 . . . ?
Cu1 Cu2 N21 C25 120.2(11) . . . . ?
Cu1 Cu2 N21 C25 -167.1(11) 2_656 . . . ?
Cu3 Cu2 N21 C25 104.2(11) . . . . ?
S1 Cu2 N21 C25 -173.4(11) 2_656 . . . ?
S2 Cu2 N21 C25 145.8(11) 2_656 . . . ?
Cu2 Cu2 N21 C25 157.2(11) 2_656 . . . ?
S3 Cu2 N21 C21 50.6(3) 2_656 . . . ?
S2 Cu2 N21 C21 -2.0(2) . . . . ?
S1 Cu2 N21 C21 -91.5(3) . . . . ?
I3 Cu2 N21 C21 168.5(3) 1_455 . . . ?
Cu1 Cu2 N21 C21 -59.7(3) . . . . ?
Cu1 Cu2 N21 C21 13.0(3) 2_656 . . . ?
Cu3 Cu2 N21 C21 -75.8(3) . . . . ?
S1 Cu2 N21 C21 6.7(3) 2_656 . . . ?
S2 Cu2 N21 C21 -34.1(3) 2_656 . . . ?
Cu2 Cu2 N21 C21 -22.8(3) 2_656 . . . ?
S3 Cu1 N31 C35 -177.2(12) . . . . ?
S1 Cu1 N31 C35 -161.8(10) . . . . ?
S2 Cu1 N31 C35 -68.0(11) . . . . ?
I1 Cu1 N31 C35 40.6(11) . . . . ?
Cu2 Cu1 N31 C35 -75.1(12) . . . . ?
Cu3 Cu1 N31 C35 -179.4(11) . . . . ?
Cu2 Cu1 N31 C35 -157.8(12) 2_656 . . . ?
S2 Cu1 N31 C35 -158.8(11) 2_656 . . . ?
S1 Cu1 N31 C35 -123.1(12) 2_656 . . . ?
Cu1 Cu1 N31 C35 -127.8(11) 2_656 . . . ?
S3 Cu1 N31 C31 -7.7(3) . . . . ?
S1 Cu1 N31 C31 7.8(6) . . . . ?
S2 Cu1 N31 C31 101.5(3) . . . . ?
I1 Cu1 N31 C31 -149.8(3) . . . . ?
Cu2 Cu1 N31 C31 94.4(3) . . . . ?
Cu3 Cu1 N31 C31 -9.9(4) . . . . ?
Cu2 Cu1 N31 C31 11.8(3) 2_656 . . . ?
S2 Cu1 N31 C31 10.8(3) 2_656 . . . ?
S1 Cu1 N31 C31 46.5(3) 2_656 . . . ?
Cu1 Cu1 N31 C31 41.7(3) 2_656 . . . ?
C15 N11 C11 C12 0.7(9) . . . . ?
Cu3 N11 C11 C12 175.0(5) . . . . ?
C15 N11 C11 S1 179.5(5) . . . . ?
Cu3 N11 C11 S1 -6.3(3) . . . . ?
Cu1 S1 C11 N11 136.1(4) . . . . ?
Cu3 S1 C11 N11 9.4(5) . . . . ?
Cu2 S1 C11 N11 -139.5(4) . . . . ?
S2 S1 C11 N11 10.9(7) 2_656 . . . ?
S3 S1 C11 N11 103.6(4) . . . . ?
S2 S1 C11 N11 180.0(3) . . . . ?
Cu2 S1 C11 N11 69.5(6) 2_656 . . . ?
Cu1 S1 C11 N11 -65.0(9) 2_656 . . . ?
S1 S1 C11 N11 159.1(6) 2_656 . . . ?
Cu1 S1 C11 C12 -45.3(5) . . . . ?
Cu3 S1 C11 C12 -171.9(4) . . . . ?
Cu2 S1 C11 C12 39.2(5) . . . . ?
S2 S1 C11 C12 -170.5(3) 2_656 . . . ?
S3 S1 C11 C12 -77.7(5) . . . . ?
S2 S1 C11 C12 -1.3(6) . . . . ?
Cu2 S1 C11 C12 -111.8(5) 2_656 . . . ?
Cu1 S1 C11 C12 113.7(7) 2_656 . . . ?
S1 S1 C11 C12 -22.2(13) 2_656 . . . ?
N11 C11 C12 C13 -0.6(8) . . . . ?
S1 C11 C12 C13 -179.3(5) . . . . ?
C11 C12 C13 C14 -0.2(9) . . . . ?
C12 C13 C14 C15 0.8(10) . . . . ?
C13 C14 C15 N11 -0.7(11) . . . . ?
C11 N11 C15 C14 -0.1(10) . . . . ?
Cu3 N11 C15 C14 -165.3(7) . . . . ?
C25 N21 C21 C22 0.2(8) . . . . ?
Cu2 N21 C21 C22 -179.8(5) . . . . ?
C25 N21 C21 S2 -177.6(5) . . . . ?
Cu2 N21 C21 S2 2.4(3) . . . . ?
Cu3 S2 C21 N21 -144.8(3) 2_656 . . . ?
Cu2 S2 C21 N21 -3.8(5) . . . . ?
Cu1 S2 C21 N21 77.7(4) . . . . ?
S3 S2 C21 N21 114.5(4) . . . . ?
S1 S2 C21 N21 -161.1(3) 2_656 . . . ?
S1 S2 C21 N21 41.6(5) . . . . ?
Cu1 S2 C21 N21 -89.7(9) 2_656 . . . ?
Cu2 S2 C21 N21 133.2(4) 2_656 . . . ?
S2 S2 C21 N21 70.7(8) 2_656 . . . ?
Cu3 S2 C21 C22 37.6(5) 2_656 . . . ?
Cu2 S2 C21 C22 178.6(4) . . . . ?
Cu1 S2 C21 C22 -99.9(5) . . . . ?
S3 S2 C21 C22 -63.1(5) . . . . ?
S1 S2 C21 C22 21.3(7) 2_656 . . . ?
S1 S2 C21 C22 -136.0(4) . . . . ?
Cu1 S2 C21 C22 92.8(10) 2_656 . . . ?
Cu2 S2 C21 C22 -44.4(7) 2_656 . . . ?
S2 S2 C21 C22 -106.9(7) 2_656 . . . ?
N21 C21 C22 C23 -0.5(8) . . . . ?
S2 C21 C22 C23 177.1(5) . . . . ?
C21 C22 C23 C24 1.2(10) . . . . ?
C22 C23 C24 C25 -1.5(10) . . . . ?
C23 C24 C25 N21 1.2(10) . . . . ?
C21 N21 C25 C24 -0.5(9) . . . . ?
Cu2 N21 C25 C24 179.6(7) . . . . ?
C35 N31 C31 C32 1.8(9) . . . . ?
Cu1 N31 C31 C32 -173.3(5) . . . . ?
C35 N31 C31 S3 -175.4(5) . . . . ?
Cu1 N31 C31 S3 9.5(3) . . . . ?
Cu2 S3 C31 N31 -151.9(4) 2_656 . . . ?
Cu1 S3 C31 N31 -13.8(5) . . . . ?
S1 S3 C31 N31 -113.5(5) 2_656 . . . ?
S2 S3 C31 N31 -138.5(4) 2_656 . . . ?
S2 S3 C31 N31 -52.1(4) . . . . ?
S1 S3 C31 N31 -23.7(6) . . . . ?
Cu3 S3 C31 N31 -59.3(19) . . . . ?
Cu2 S3 C31 C32 31.1(6) 2_656 . . . ?
Cu1 S3 C31 C32 169.2(5) . . . . ?
S1 S3 C31 C32 69.5(5) 2_656 . . . ?
S2 S3 C31 C32 44.6(7) 2_656 . . . ?
S2 S3 C31 C32 130.9(5) . . . . ?
S1 S3 C31 C32 159.4(4) . . . . ?
Cu3 S3 C31 C32 123.7(16) . . . . ?
N31 C31 C32 C33 -1.6(10) . . . . ?
S3 C31 C32 C33 175.5(6) . . . . ?
C31 C32 C33 C34 1.4(13) . . . . ?
C32 C33 C34 C35 -1.3(14) . . . . ?
C33 C34 C35 N31 1.4(12) . . . . ?
C31 N31 C35 C34 -1.7(11) . . . . ?
Cu1 N31 C35 C34 165.9(8) . . . . ?

loop_
_geom_hbond_atom_site_label_D
_geom_hbond_atom_site_label_H
_geom_hbond_atom_site_label_A
_geom_hbond_distance_DH
_geom_hbond_distance_HA
_geom_hbond_distance_DA
_geom_hbond_angle_DHA
_geom_hbond_site_symmetry_A
N11 H11A I2 0.89 2.67 3.492(5) 155.0 .
N21 H21A I3 0.94 2.68 3.569(5) 157.0 1_455
N31 H31A I1 0.86 2.82 3.623(5) 156.8 .

_diffrn_measured_fraction_theta_max 0.996
_diffrn_reflns_theta_full        26.37
_diffrn_measured_fraction_theta_full 0.996
_refine_diff_density_max         1.150
_refine_diff_density_min         -1.242
_refine_diff_density_rms         0.135


#===END
